# Supplementary material for: Getting the most out of intensive longitudinal data: a methodological review of workload–injury studies
Source: PubMed Central journal article supplement — BMJ Open. 2018 Oct 2;8(10):e022626. doi: 10.1136/bmjopen-2018-022626 (PMC6169745; doi:10.1136/bmjopen-2018-022626), 2018-10-02
Supplement: bmjopen-2018-022626.draft_revisions.pdf [file bmjopen-2018-022626.draft_revisions.pdf]

# BMJ Open

BMJ Open is committed to open peer review. As part of this commitment we make the peer review history of every article we publish publicly available.

When an article is published we post the peer reviewers' comments and the authors' responses online. We also post the versions of the paper that were used during peer review. These are the versions that the peer review comments apply to.

The versions of the paper that follow are the versions that were submitted during the peer review process. They are not the versions of record or the final published versions. They should not be cited or distributed as the published version of this manuscript.

BMJ Open is an open access journal and the full, final, typeset and author-corrected version of record of the manuscript is available on our site with no access controls, subscription charges or pay-per-view fees (<http://bmjopen.bmj.com>).

If you have any questions on BMJ Open's open peer review process please email [info.bmjopen@bmj.com](mailto:info.bmjopen@bmj.com)

# BMJ Open

## Getting the most out of intensive longitudinal data: A methodological review of workload—injury studies

|                               |                                                                                                                                                                                                                                                                                                                                                                                                                                                                                                                                                 |
|-------------------------------|-------------------------------------------------------------------------------------------------------------------------------------------------------------------------------------------------------------------------------------------------------------------------------------------------------------------------------------------------------------------------------------------------------------------------------------------------------------------------------------------------------------------------------------------------|
| Journal:                      | <i>BMJ Open</i>                                                                                                                                                                                                                                                                                                                                                                                                                                                                                                                                 |
| Manuscript ID                 | bmjopen-2018-022626                                                                                                                                                                                                                                                                                                                                                                                                                                                                                                                             |
| Article Type:                 | Research                                                                                                                                                                                                                                                                                                                                                                                                                                                                                                                                        |
| Date Submitted by the Author: | 13-Mar-2018                                                                                                                                                                                                                                                                                                                                                                                                                                                                                                                                     |
| Complete List of Authors:     | Windt, Johann; University of British Columbia, Experimental Medicine<br>Ardern, CL; Linköping University, Division of Physiotherapy<br>Gabbett, Tim; Gabbett Performance Solutions; University of Southern Queensland<br>Khan, Karim; The University of British Columbia, Centre for Hip Health & Mobility<br>Cook, Chad; Duke University, Department of Orthopedics<br>Sporer, Ben; University of British Columbia, Family Practice<br>Zumbo, Bruno; University of British Columbia, Measurement, Evaluation, and Research Methodology Program |
| Keywords:                     | STATISTICS & RESEARCH METHODS, PREVENTIVE MEDICINE, SPORTS MEDICINE                                                                                                                                                                                                                                                                                                                                                                                                                                                                             |
|                               |                                                                                                                                                                                                                                                                                                                                                                                                                                                                                                                                                 |

SCHOLARONE™  
Manuscripts

Running Title: ALIGNING THEORY, DATA COLLECTION, AND STATISTICAL ANALYSES IN SPORTS  
MEDICINE RESEARCH USING LONGITUDINAL DATA

## Getting the most out of intensive longitudinal data: A methodological review of workload—injury studies

Johann Windt,<sup>1,2,3</sup> Clare L Ardern,<sup>4,5</sup> Tim J. Gabbett,<sup>6,7</sup> Karim M. Khan,<sup>1</sup> Chad E. Cook,<sup>8</sup>

Ben Sporer,<sup>9,10</sup> Bruno D. Zumbo<sup>11</sup>

<sup>1</sup> *Experimental Medicine Program, University of British Columbia, Vancouver, Canada*

<sup>2</sup> *United States Olympic Committee, Colorado Springs, United States of America*

<sup>3</sup> *United States Coalition for the Prevention of Illness and Injury in Sport, Colorado Springs, United States of America*

<sup>4</sup> *Division of Physiotherapy, Linköping University, Linköping, Sweden*

<sup>5</sup> *School of Allied Health, La Trobe University, Melbourne, Australia*

<sup>6</sup> *Gabbett Performance Solutions, Brisbane, Australia*

<sup>7</sup> *University of Southern Queensland, Institute for Resilient Regions, Ipswich, Australia*

<sup>8</sup> *Department of Orthopaedics, Duke University, Durham, United States of America*

<sup>9</sup> *Department of Family Practice, University of British Columbia*

<sup>10</sup> *Vancouver Whitecaps Football Club, Vancouver, British Columbia*

<sup>11</sup> *Measurement, Evaluation, and Research Methodology Program, University of British Columbia, Vancouver, Canada*

Corresponding Author:

Johann Windt, MSc, CSCS (ORCID ID: 0000-0001-5517-2609)

2635 Laurel Street, Vancouver, BC V5Z 1M9.

Email: johannwindt@gmail.com

Key Words: Methodology, workloads, training load, athletic injury, statistics

Word Count: 7085

1  
2  
3 **Objectives:** The quality of longitudinal research can be improved by authors aligning the (1) theoretical model,  
4 (2) temporal design, and (3) statistical approach. Intensive longitudinal data (ILD) are increasingly common and  
5 pose methodological/statistical challenges that increase the need to align these three components. The field of  
6 sports medicine provides an example where many prospective cohort studies include ILD; a specific example that  
7 provides substrate to evaluate the statistical approaches is in studies of the association between athletic workloads  
8 and injury. Therefore, we reviewed the statistical approaches used in prospective cohort studies that used ILD to  
9 examine the association between athletic workloads and injury.  
10  
11  
12  
13  
14  
15  
16  
17

18 **Design:** Methodological review.  
19  
20

21 **Methods:** We systematically identified, and qualitatively reviewed, the statistical approaches used in 34  
22 prospective cohort studies of team sports that reported ILD (>20 observations per athlete) and examined the  
23 relationship between athletic workloads and injuries. Using Lisa Collins' three-part framework, our primary aim  
24 was to assess how well the statistical approaches aligned with the intensive longitudinal nature of the data, and  
25 with the underlying theoretical model.  
26  
27  
28  
29  
30  
31

32 **Results:** Statistical methods such as correlations, t-tests, and simple linear/logistic regression were commonly  
33 used. However, these methods did not adequately address the (1) themes of theoretical models underlying  
34 workloads and injury, nor the (2) temporal design challenges (ILD). Time-to-event analyses (e.g. Cox  
35 Proportional Hazards and frailty models), generalized estimating equations and multilevel modelling are better-  
36 suited for ILD, but these were utilized in fewer than a 30% of the studies (n=10).  
37  
38  
39  
40  
41  
42  
43

44 **Conclusions:** Rapidly accelerating availability of intensive longitudinal data is the norm in many fields of health  
45 care delivery and thus health research. These data present an opportunity to better address research questions,  
46 especially when appropriate statistical analyses are chosen.  
47  
48  
49  
50  
51  
52  
53  
54  
55  
56  
57  
58  
59  
60

### STRENGTHS AND LIMITATIONS

- As intensive longitudinal data are becoming increasingly common across disciplines, catalysed by technological advances, this methodological review provides researchers with a number of considerations when determining how they will analyse these data.
- Whereas systematic reviews provide a quantitative synthesis of research findings, they do not account for the statistical approaches used in the original studies. Therefore, methodological reviews like this one fill an important void in the literature to highlight key shortcomings and ways forward from a methodological and statistical perspective.
- By choosing a homogenous group of papers – prospective cohort studies in team sports that collected intensive longitudinal data – we were able to focus more directly on the statistical analyses that authors employed.
- It was beyond the scope of this review to list every challenge posed by intensive longitudinal data, and we are not exhaustive in our discussion of different analyses and their capacity to handle the challenges that we did highlight.

## INTRODUCTION

Intensive longitudinal data (ILD) are being collected more frequently in various research areas [1], catalysed by technological advancements that simplify data collection and analysis [2]. By collecting data repeatedly on the same participants, researchers are enabled to answer more detailed research questions, particularly regarding phenomena that change or fluctuate over time. However, arriving at these answers requires researchers to overcome the challenges of analysing ILD, which include: (1) the dependencies created by repeated measures, (2) missing/unbalanced data, (3) separating between- and within-person effects, (4) time-varying and time-invariant (stable) factors, and (5) specifying the role of time/temporality [3].

The field of exercise and sports medicine provides one specific example which can illustrate principles that apply to the use of intensive longitudinal data broadly. In the field of sports performance, technological advances mean that a plethora of physiological, psychological and physical data are conveniently available from athletes [4,5]. As one example, of professional 48 football clubs that responded to a survey on player monitoring, 100% reported collecting daily global positioning system (GPS) and heart rate (HR) data [6].

One research question that has gained a great deal of interest in the last decade is how athletes' training and competition workloads relate to injury risk. Since athletes' training and injury risk continually varies over time – many researchers have used prospective cohort studies to collect and analyse ILD to answer this question [7].

There is moderate evidence from systematic reviews and an International Olympic Committee (IOC) consensus statement suggesting a positive relationship between injury rates and high training workloads, increased risk of injury with low workloads, and a pronounced increase in injury risk associated with rapid workload increases [7–11]. However, such systematic reviews do not consider the statistical approaches used in included studies [12].

Choosing the wrong statistical analysis or poorly implementing an otherwise correct one (e.g. violating statistical assumptions) can bias results and create false conclusions. Even a perfectly performed systematic review cannot compensate for poorly designed, or poorly analysed studies [13].

1  
2  
3 Longitudinal data analysis is most effective when the chosen statistical approach aligns with the frequency of data  
4 collection and with the theoretical model underpinning the research question (See Box 1) [14]. Therefore, we used  
5 this lens to evaluate whether the statistical models employed in prospective cohort studies using ILD to  
6 investigate the relation between athletic workloads and injury were optimal. There were 3 aims: (1) to summarise  
7 researchers' data collection, methodological, statistical, and reporting practices [12,15]; (2) to evaluate the degree  
8 to which the adopted statistical analyses fit within Collins' three-fold alignment; and (3) to provide  
9 recommendations for future investigations in the field.  
10  
11  
12  
13  
14  
15  
16  
17  
18

19 *Box 1: Theoretical model – temporal design – analytical model.*

20  
21  
22 *In a landmark, highly-cited paper, Professor Linda Collins described how aligning the (1) theoretical model*  
23 *(subject matter theory), (2) temporal design (data collection strategy/timing), and (3) statistical model (analytical*  
24 *strategy) is crucial when analysing longitudinal data [14]. For example, if researchers (1) theorize that a given*  
25 *physiological variable fluctuates every hour, (2) data must be collected at least on an hourly basis. If researchers*  
26 *measure participants once a day, they will miss virtually all the hourly fluctuations that their theories predict.*  
27 *Once researchers have collected their hourly data, they should (3) select a statistical strategy that enables them*  
28 *to examine the relationship between these fluctuations and the outcome of interest. As Collins noted, perfect*  
29 *alignment of these 3 components may not be possible, but it provides researchers a target, and readers a lens*  
30 *through which longitudinal research can be evaluated.*  
31  
32  
33  
34  
35  
36  
37  
38  
39  
40  
41  
42  
43

## 44 **METHODS**

### 45 **Article selection**

46 We systematically searched the literature (MEDLINE, CINAHL, SPORTDISCUS, PsychInfo, and EMBASE)  
47 (December 10, 2016) to identify systematic reviews and consensus statements that investigated the relationship  
48 between workloads and athletic injuries, with the aim of extracting all original articles included in these reviews  
49 that met our inclusion criteria. A summary of the systematic search and article selection process is described in  
50 Appendix 1 (Table A1 and Figure A1), and the full systematic search is available from the authors.  
51  
52  
53  
54  
55  
56  
57  
58  
59  
60

1  
2  
3 A priori, we operationally defined ‘workload’ as either external – the amount of work completed by the athlete  
4 (e.g. distance run, hours completed, etc.) or internal – the athlete’s response to a given external workload (e.g.  
5 session rating of perceived exertion, heart-rate based measures, etc.). We acknowledge that athlete self-reported  
6 measures often evaluate how athletes are handling the demands of training and may be referred to as ‘internal’  
7 load measures, but we considered these perceptual wellbeing measures as a distinct step from quantifying  
8 athletes’ internal or external workloads [16]. Athletic injuries have been diversely defined in the literature, so we  
9 operationally defined athletic injury as any article that reported measuring ‘injury’, regardless of their specific  
10 definition (e.g. time loss, medical attention, etc).

11  
12 Two authors (JW + TG) screened the titles/abstracts of the systematic reviews. Where necessary, the full texts of  
13 the reviews retrieved in the search. A total of 6 systematic reviews [7–10,17,18] and 1 consensus statement [11]  
14 were identified that included at least 1 article meeting the inclusion criteria.

15  
16 We extracted and reviewed the full texts of all the original studies included (n=279) in these 7 papers. For our  
17 analysis included all the original articles that met the following criteria:

- 18  
19  
20  
21  
22  
23  
24  
25  
26  
27  
28  
29  
30  
31  
32  
33 1) Original articles were prospective cohort studies that examined the relationship between at least 1  
34 measure of internal or external workload (as defined above) and athletic injury. Since theoretical models  
35 describe the recursive nature of injury risk with each training or competition exposure, workloads had to  
36 be continually monitored and include both training and match workloads for the same athletes. Although  
37 some athletes may have entered or left the group during the study period (e.g. through retirement or trades  
38 to other teams) the same team/group of athletes had to be followed throughout the study period, as  
39 opposed to repeated cross-sectional snapshots of different  
40  
41  
42  
43  
44  
45  
46  
47  
48  
49  
50  
51  
52  
53  
54  
55  
56  
57  
58  
59  
60  
61  
62  
63  
64  
65  
66  
67  
68  
69  
70  
71  
72  
73  
74  
75  
76  
77  
78  
79  
80  
81  
82  
83  
84  
85  
86  
87  
88  
89  
90  
91  
92  
93  
94  
95  
96  
97  
98  
99  
100  
101  
102  
103  
104  
105  
106  
107  
108  
109  
110  
111  
112  
113  
114  
115  
116  
117  
118  
119  
120  
121  
122  
123  
124  
125  
126  
127  
128  
129  
130  
131  
132  
133  
134  
135  
136  
137  
138  
139  
140  
141  
142  
143  
144  
145  
146  
147  
148  
149  
150  
151  
152  
153  
154  
155  
156  
157  
158  
159  
160  
161  
162  
163  
164  
165  
166  
167  
168  
169  
170  
171  
172  
173  
174  
175  
176  
177  
178  
179  
180  
181  
182  
183  
184  
185  
186  
187  
188  
189  
190  
191  
192  
193  
194  
195  
196  
197  
198  
199  
200  
201  
202  
203  
204  
205  
206  
207  
208  
209  
210  
211  
212  
213  
214  
215  
216  
217  
218  
219  
220  
221  
222  
223  
224  
225  
226  
227  
228  
229  
230  
231  
232  
233  
234  
235  
236  
237  
238  
239  
240  
241  
242  
243  
244  
245  
246  
247  
248  
249  
250  
251  
252  
253  
254  
255  
256  
257  
258  
259  
260  
261  
262  
263  
264  
265  
266  
267  
268  
269  
270  
271  
272  
273  
274  
275  
276  
277  
278  
279  
280  
281  
282  
283  
284  
285  
286  
287  
288  
289  
290  
291  
292  
293  
294  
295  
296  
297  
298  
299  
300  
301  
302  
303  
304  
305  
306  
307  
308  
309  
310  
311  
312  
313  
314  
315  
316  
317  
318  
319  
320  
321  
322  
323  
324  
325  
326  
327  
328  
329  
330  
331  
332  
333  
334  
335  
336  
337  
338  
339  
340  
341  
342  
343  
344  
345  
346  
347  
348  
349  
350  
351  
352  
353  
354  
355  
356  
357  
358  
359  
360  
361  
362  
363  
364  
365  
366  
367  
368  
369  
370  
371  
372  
373  
374  
375  
376  
377  
378  
379  
380  
381  
382  
383  
384  
385  
386  
387  
388  
389  
390  
391  
392  
393  
394  
395  
396  
397  
398  
399  
400  
401  
402  
403  
404  
405  
406  
407  
408  
409  
410  
411  
412  
413  
414  
415  
416  
417  
418  
419  
420  
421  
422  
423  
424  
425  
426  
427  
428  
429  
430  
431  
432  
433  
434  
435  
436  
437  
438  
439  
440  
441  
442  
443  
444  
445  
446  
447  
448  
449  
450  
451  
452  
453  
454  
455  
456  
457  
458  
459  
460  
461  
462  
463  
464  
465  
466  
467  
468  
469  
470  
471  
472  
473  
474  
475  
476  
477  
478  
479  
480  
481  
482  
483  
484  
485  
486  
487  
488  
489  
490  
491  
492  
493  
494  
495  
496  
497  
498  
499  
500  
501  
502  
503  
504  
505  
506  
507  
508  
509  
510  
511  
512  
513  
514  
515  
516  
517  
518  
519  
520  
521  
522  
523  
524  
525  
526  
527  
528  
529  
530  
531  
532  
533  
534  
535  
536  
537  
538  
539  
540  
541  
542  
543  
544  
545  
546  
547  
548  
549  
550  
551  
552  
553  
554  
555  
556  
557  
558  
559  
560  
561  
562  
563  
564  
565  
566  
567  
568  
569  
570  
571  
572  
573  
574  
575  
576  
577  
578  
579  
580  
581  
582  
583  
584  
585  
586  
587  
588  
589  
590  
591  
592  
593  
594  
595  
596  
597  
598  
599  
600  
601  
602  
603  
604  
605  
606  
607  
608  
609  
610  
611  
612  
613  
614  
615  
616  
617  
618  
619  
620  
621  
622  
623  
624  
625  
626  
627  
628  
629  
630  
631  
632  
633  
634  
635  
636  
637  
638  
639  
640  
641  
642  
643  
644  
645  
646  
647  
648  
649  
650  
651  
652  
653  
654  
655  
656  
657  
658  
659  
660  
661  
662  
663  
664  
665  
666  
667  
668  
669  
670  
671  
672  
673  
674  
675  
676  
677  
678  
679  
680  
681  
682  
683  
684  
685  
686  
687  
688  
689  
690  
691  
692  
693  
694  
695  
696  
697  
698  
699  
700  
701  
702  
703  
704  
705  
706  
707  
708  
709  
710  
711  
712  
713  
714  
715  
716  
717  
718  
719  
720  
721  
722  
723  
724  
725  
726  
727  
728  
729  
730  
731  
732  
733  
734  
735  
736  
737  
738  
739  
740  
741  
742  
743  
744  
745  
746  
747  
748  
749  
750  
751  
752  
753  
754  
755  
756  
757  
758  
759  
760  
761  
762  
763  
764  
765  
766  
767  
768  
769  
770  
771  
772  
773  
774  
775  
776  
777  
778  
779  
780  
781  
782  
783  
784  
785  
786  
787  
788  
789  
790  
791  
792  
793  
794  
795  
796  
797  
798  
799  
800  
801  
802  
803  
804  
805  
806  
807  
808  
809  
810  
811  
812  
813  
814  
815  
816  
817  
818  
819  
820  
821  
822  
823  
824  
825  
826  
827  
828  
829  
830  
831  
832  
833  
834  
835  
836  
837  
838  
839  
840  
841  
842  
843  
844  
845  
846  
847  
848  
849  
850  
851  
852  
853  
854  
855  
856  
857  
858  
859  
860  
861  
862  
863  
864  
865  
866  
867  
868  
869  
870  
871  
872  
873  
874  
875  
876  
877  
878  
879  
880  
881  
882  
883  
884  
885  
886  
887  
888  
889  
890  
891  
892  
893  
894  
895  
896  
897  
898  
899  
900  
901  
902  
903  
904  
905  
906  
907  
908  
909  
910  
911  
912  
913  
914  
915  
916  
917  
918  
919  
920  
921  
922  
923  
924  
925  
926  
927  
928  
929  
930  
931  
932  
933  
934  
935  
936  
937  
938  
939  
940  
941  
942  
943  
944  
945  
946  
947  
948  
949  
950  
951  
952  
953  
954  
955  
956  
957  
958  
959  
960  
961  
962  
963  
964  
965  
966  
967  
968  
969  
970  
971  
972  
973  
974  
975  
976  
977  
978  
979  
980  
981  
982  
983  
984  
985  
986  
987  
988  
989  
990  
991  
992  
993  
994  
995  
996  
997  
998  
999  
1000
- 1) Articles collected intensive longitudinal data. We defined intensive longitudinal data as >20 observations per athlete [14].
- 2) Articles studied team sport athletes. We chose team sports because (1) there are high amounts of ILD collected in applied team sport settings [6], and (2) the majority of workload—injury studies are in team



1  
2  
3 sport athletes (Jones, 2016). Military populations and individual sports (e.g. distance running) were  
4  
5 excluded due to the differences in task requirements and operating environment.  
6  
7

### 8 **Patient and public involvement**

9 As a methodological review, there was no patient or public involvement in this current investigation.  
10

### 11 **Article coding and description**

12 To describe the methodological, statistical, and reporting approaches utilized in each article, two authors (JW +  
13 CA) reviewed all the included papers and extracted 50 items of information, including publication year, journal,  
14  
15 variable operationalization (e.g. internal vs. external load measures, injury definition, etc), methodological  
16  
17 approaches, statistical analyses implemented, reported findings, and more. To ensure consistency between coders,  
18  
19 10 articles were randomly selected and coded independently by both reviewers. Discrepancies were discussed by  
20  
21 the two coders and an additional 5 articles were randomly selected and coded. The remaining articles were coded  
22  
23 by JW and checked by CA.  
24  
25  
26  
27

### 28 **Assessing statistical models' alignment with Collins' threefold framework**

29 To evaluate the statistical approaches used in this field, we first identified the key themes and challenges within  
30  
31 the theoretical models and temporal design features within the workload—injury field, then developed a  
32  
33 qualitative assessment to evaluate the statistical approaches.  
34  
35  
36  
37

38 Collins Component 1: The theoretical models that underpin athletic workloads and injury risk (in brief)

39 Briefly, we identified at least 3 key elements of athletic injury aetiology models. First, *sports injuries are*  
40  
41 *multifactorial* [19–21]. Aetiology models since 1994 have all explained between-athlete differences in injury risk  
42  
43 by identifying a host of 'internal' (e.g. athlete characteristics, psychological wellbeing, previous injury) and  
44  
45 'external' (e.g. opponent behaviour, playing surface) risk factors. More recently, Meeuwisse et al.'s dynamic  
46  
47 recursive model [22] and the workload—injury aetiology model [23], have highlighted the recurrent nature of  
48  
49 injury risk, meaning each athlete's injury risk (i.e. within-athlete risk) also fluctuates continually as they train or  
50  
51 compete in their sport (Figure 1). Thus, a second theme is that *injury risk differs between- and within-athletes*.  
52  
53

54 Finally, more recent injury aetiology models have highlighted *injury risk as a complex, dynamic system* (Figure 2)  
55  
56  
57  
58  
59

1  
2  
3 [24,25]. Complex systems, as in weather forecasting or biological systems [26,27], possess many key features,  
4 including an open-system, inherent non-linearity between variables and outcomes, recursive loops where the  
5 system output becomes the new system input, self-organization where regular patterns (risk profiles) may emerge  
6 for given outcomes (emergent pattern), and uncertainty [24].  
7  
8  
9

10  
11 --- INSERT FIGURE 1 HERE ---  
12

13 **Figure 1** – The workload—injury aetiology model. Key features include the multifactorial nature of injury,  
14 between- and within- athlete differences in risk, and a recursive loop.  
15  
16

17  
18  
19 --- INSERT FIGURE 2 HERE ---  
20

21 **Figure 2** – Complex systems model of athletic injury. Web of determinants are shown for an ACL injury in  
22 basketball players (A), and in a ballet dancer (B)  
23  
24

25 Collins' 2<sup>nd</sup> Component – Temporal design / data collection  
26

27  
28 The theoretical models relating workloads and injury illustrate a continuously fluctuating injury risk, with many  
29 variables that influence risk on a daily or weekly basis [22–24]. Thus, if researchers want to investigate the  
30 association between workloads and injuries, these data must be collected frequently enough to observe changes in  
31 these variables as they occur (temporal design). With technological advances, athletes' physiological,  
32 psychological and physical variables are now often collected on a daily, weekly or monthly basis, along with  
33 ongoing injury surveillance data [4,5]. Therefore, in the workload—injury field, the theoretical models (injury  
34 aetiology models that describe regular fluctuation in workloads and injury risk) and the temporal design (frequent,  
35 often daily, data collection) are often well-aligned, especially in prospective cohort studies using ILD. This leaves  
36 us to consider only Professor Collins' third component – the statistical model – aligns with these first two.  
37  
38  
39  
40  
41  
42  
43  
44  
45  
46  
47  
48  
49  
50  
51  
52  
53  
54  
55  
56  
57  
58  
59  
60

### Collins' Component 3 – Statistical model

From the theoretical aetiology models underpinning the workload—injury association, we highlighted three key themes to consider when choosing a statistical model: (1) injury risk is multifactorial, (2) between-athlete and within-athlete differences in injury risk fluctuate regularly, and (3) injury risk may be considered a complex, dynamic system.

From a temporal design perspective, intensive longitudinal data (ILD) are necessary to address these key themes, but they also carry at least 5 challenges that influence the choice of the statistical model.

- 1) Differentiating between- and within-person effects.
- 2) ILD include time-varying variables (e.g. workloads), and may also incorporate stable (time-invariant) variables (e.g., sex).
- 3) The 'dependency' created by repeated measurements of the same individuals violates the assumption of 'independence' common to many traditional analyses [28,29].
- 4) Almost all longitudinal datasets have missing or unbalanced data [14]. Researchers must learn how best to deal with missing data (e.g. imputation methods), and where appropriate, choose analyses that are sufficiently robust to handle missing/unbalanced data.
- 5) Longitudinal data analysis require researchers to consider the role of time in their analysis [3].

### Evaluating statistical approaches

We deliberately tried to align components 1 and 2 of Collins' framework by describing the theoretical models underpinning the workload—injury association and only including articles that had a temporal design characterised by ILD. To review whether statistical approaches aligned with these two components, two authors (JW + BZ) qualitatively assessed whether the statistical models, as employed in the included studies, (1) were multifactorial, (2) differentiated between- and within-athlete differences in injury risk, and (3) analyzed the data as a dynamic system – the three themes highlighted in the theoretical framework. From the temporal design, the same two authors evaluated whether the statistical analyses (4) included both time-varying and time-invariant

1  
2  
3 variables, (5) were robust to missing/unbalanced data, 6) addressed the dependencies created by repeated  
4  
5 measures, and (7) incorporated time into the analysis.  
6  
7  
8  
9

### 10 **Data synthesis approach**

11 We first describe the characteristics of the included articles, then present our qualitative assessment of how well  
12  
13 the various statistical approaches fit within Collins' framework.  
14  
15

## 16 **RESULTS**

17  
18 Thirty-four articles were included in this methodological review (Appendix 1). In the first 10 articles coded by  
19  
20 both reviewers, 500 criteria were coded, with 10 discrepancies between reviewers (98% agreement). No item had  
21  
22 more than 2 discrepancies. Of the 250 study criteria in the second set of 5 articles coded by both reviewers, there  
23  
24 were 8 discrepancies (97% agreement).  
25  
26

27  
28 Included articles were published from 2003 – 2016, with 78% of the studies published since 2010. Sports studied  
29  
30 included rugby league (n = 10), soccer (n = 7), Australian football (n = 6), cricket (n = 5), rugby union (n = 2),  
31  
32 multiple sports (n = 1), and basketball, handball, and volleyball (n = 1 each). Studies included an average of 96  
33  
34 athletes (median = 46), ranging from 12 [30] to 502 athletes [31]. The observation period for these cohort studies  
35  
36 ranged from 14 weeks [32] to 6 years [33]. Most studies investigated male athletes (n = 30), with 2 studies on  
37  
38 female athletes, and 2 on both sexes. Table 1 summarizes the basic characteristics of the included articles, while  
39  
40 the full data extraction table is available from the authors upon request.  
41  
42

### 43 **Data collection**

#### 44 **Injury definitions**

45  
46  
47  
48 Injury definitions varied across articles, with exact wording outlined in the Online Supplementary Appendix. In  
49  
50 Table 2, we have categorised the definitions into more discrete injury categories (and subcategories) in  
51  
52 accordance with recognized consensus statements [34]. Where studies used multiple injury definitions, we  
53  
54 categorized them according to the definition used for the primary analysis.  
55  
56  
57  
58  
59  
60

| Reference                          | Journal                          | Study Length        | Sport                                                   | Level                        | Sex               | Age                                                                                    |
|------------------------------------|----------------------------------|---------------------|---------------------------------------------------------|------------------------------|-------------------|----------------------------------------------------------------------------------------|
| (Anderson et al., 2003) [30]       | <i>JSCR</i>                      | 21 weeks            | Basketball                                              | Sub-elite competitive        | Female            | 18-22                                                                                  |
| (Arnason et al., 2004) [35]        | <i>AJSM</i>                      | 1 season            | Soccer                                                  | Professional                 | Male              | 24 (16-38)                                                                             |
| (Bowen et al., 2016) [36]          | <i>BJSM</i>                      | 2 seasons           | Soccer                                                  | Elite Youth Players          | Male              | 17.3 ± 0.9                                                                             |
| (Bresciani et al., 2010) [37]      | <i>Eur J Sport Sci</i>           | 1 season (40 weeks) | Handball                                                | Elite                        | Male              | 20.1 (2.5)                                                                             |
| (Brink et al., 2010) [38]          | <i>JSCR</i>                      | 2 years             | Soccer                                                  | Elite Youth Players          | Male              | 16.5 ± 1.2                                                                             |
| (Brooks et al., 2008) [31]         | <i>J Sports Sci</i>              | 2 seasons           | Rugby Union                                             | Professional                 | Male              | Not reported                                                                           |
| (Clausen et al., 2014) [39]        | <i>AJSM</i>                      | 1 season            | Soccer                                                  | Recreational / Adolsecent    | Female            | 15-18                                                                                  |
| (Colby et al., 2014) [40]          | <i>JSCR</i>                      | 1 season            | AFL                                                     | Professional                 | Male              | 25.1 ± 3.4                                                                             |
| (Cross et al., 2015) [41]          | <i>IJSP</i>                      | 1 season            | Rugby Union                                             | Professional                 | Male              | Not reported                                                                           |
| (Dennis et al., 2004) [42]         | <i>J Sci Med Sport</i>           | 1 season            | Cricket                                                 | Professional                 | Male              | 25.2 (range = 21-34)                                                                   |
| (Dennis et al., 2003) [43]         | <i>J Sci Med Sport</i>           | 2 seasons           | Cricket                                                 | Professional                 | Male              | 27 (range 18 - 38)                                                                     |
| (Dennis et al., 2005) [44]         | <i>BJSM</i>                      | 1 season            | Cricket                                                 | Sub-elite                    | Male              | 14.7 years                                                                             |
| (Duhig et al., 2016) [45]          | <i>BJSM</i>                      | 2 seasons           | AFL                                                     | Professional                 | Male              | 22.2 (3.4)                                                                             |
| (Ehrmann et al., 2015) [46]        | <i>JSCR</i>                      | 1 season            | Soccer                                                  | Professional                 | Male              | 25.7 (5.1) Range 18-33                                                                 |
| (Gabbett, 2010) [47]               | <i>JSCR</i>                      | 4 years             | Rugby league                                            | Professional                 | Male              | 23.7 (3.8)                                                                             |
| (Tim J. Gabbett, 2004) [48]        | <i>J Sports Sci</i>              | 1 season (2001)     | Rugby league                                            | Semi-professional            | Male              | Not reported                                                                           |
| (Tim J. Gabbett, 2004) [49]        | <i>BJSM</i>                      | 3 years (2001-2003) | Rugby league                                            | Sub-elite                    | Male              | 22.9 (20.7-25.1) in 2001<br>19.6 (18.4 to 20.8) in 2002<br>21.5 (19.6 to 23.4) in 2003 |
| (Gabbett and Jenkins, 2011) [50]   | <i>J Sci Med Sport</i>           | 4 years             | Rugby league                                            | Professional                 | Male              | 23.3 (3.8)                                                                             |
| (Gabbett and Domrow, 2007) [51]    | <i>J Sports Sci</i>              | 2 seasons           | Rugby league                                            | "Sub-elite"                  | Male              | 21.4 ± 5.1                                                                             |
| (Gabbett and Ullah, 2012) [52]     | <i>JSCR</i>                      | 1 season            | Rugby league                                            | Professional                 | Male              | 23.6 (3.8)                                                                             |
| (Hulin et al., 2014) [33]          | <i>BJSM</i>                      | 6 years             | Cricket                                                 | Professional                 | Male              | 26 ± 5                                                                                 |
| (Hulin et al., 2016a) [53]         | <i>BJSM</i>                      | 2 seasons           | Rugby league                                            | Professional                 | Male              | 24.8 (3.4)                                                                             |
| (Hulin et al., 2016b) [53]         | <i>BJSM</i>                      | 2 seasons           | Rugby league                                            | Professional                 | Male              | 23.4 (3.5)                                                                             |
| (Killen et al., 2010) [32]         | <i>JSCR</i>                      | 14 weeks            | Rugby league                                            | Professional                 | Male              | 17-32                                                                                  |
| (Malisoux et al., 2013) [54]       | <i>J Sci Med Sport</i>           | 41 weeks            | Varied (individual sports, racquet sports, team sports) | Competitive (high-school)    | Both              | 14.1 (12-19)                                                                           |
| (Mallo and Dellal, 2012) [55]      | <i>J Sports Med Phys Fitness</i> | 2 seasons           | Soccer                                                  | Professional                 | Male              | 21.4                                                                                   |
| (Murray et al., 2016b) [56]        | <i>Scand J Med Sci Sports</i>    | 2 seasons           | AFL                                                     | Professional                 | Male              | 23 (4)                                                                                 |
| (Murray et al., 2016a) [57]        | <i>IJSP</i>                      | 1 season            | AFL                                                     | Professional                 | Male              | 23.1 (3.7)                                                                             |
| (Owen et al., 2015) [58]           | <i>J Sci Med Sport</i>           | 1 season            | AFL                                                     | Elite                        | Male              | 22 (2.9)                                                                               |
| (Rogalski et al., 2013) [59]       | <i>BJSM</i>                      | 1 season            | Cricket                                                 | Elite                        | Male              | 24.4 (3.9). Range 18-32                                                                |
| (Saw et al., 2011)[60]             | <i>J Sci Med Sport</i>           | 15 weeks            | AFL                                                     | Elite                        | Male              | 23.4 (3.8)                                                                             |
| (Veugelers et al., 2015)[61]       | <i>Scand J Med Sci Sports</i>    | 4 years             | Volleyball                                              | Elite high school volleyball | Both (69 M, 72 F) | 16.8 ± 0.8                                                                             |
| (Visnes and Bahr, 2013) [62]       | <i>BJSM</i>                      | 1 season            | Rugby league                                            | Elite                        | Male              | 25 ± 3                                                                                 |
| (Windt et al., 2016) <sup>68</sup> | <i>JSCR</i>                      | 2 seasons           | Soccer                                                  | Professional                 | Male              | 26.8 years                                                                             |

**Table 1:** Summary of included workload—injury investigations

**Table 2:** Broad injury definitions used in workload—injury investigations

| Injury Definition                                                       | N  |
|-------------------------------------------------------------------------|----|
| <b>Time-Loss</b>                                                        |    |
| All time-loss                                                           | 13 |
| Match time-loss                                                         | 2  |
| Non-contact time-loss                                                   | 7  |
| Non-contact match time-loss                                             | 1  |
| <b>Medical Attention</b>                                                |    |
| Medical attention                                                       | 7  |
| Player-reported pain, soreness, or discomfort                           | 1  |
| Non-contact medical attention injuries                                  | 1  |
| Clinical diagnosis of jumper's knee                                     | 1  |
| <b>Other</b>                                                            |    |
| Injury scale on the Recovery-Stress Questionnaire for Athletes (REST-Q) | 1  |

#### Subsequent or recurrent injuries

Of the 34 articles, 30 did not define or include subsequent or recurrent injuries. Of those that explicitly addressed subsequent injuries, two defined these injuries as those occurring at the same time and occurring by the same mechanism [55,63]. Two articles explicitly stated that they only considered time until first injury, meaning no injuries were subsequent or recurrent [43,44].

#### Workload definitions

Workload variables varied widely across articles and are summarized in Table 3. For a more detailed description of each article's load measures, see the Online Supplementary Appendix. Many articles used workload metrics to derive additional variables from workload distribution over time (e.g. monotony, strain, acute:chronic workload ratios).

**Table 3:** Independent variables used in workload—injury investigations

| <b>Workload Measure</b>   | <b>N</b> |
|---------------------------|----------|
| Internal                  |          |
| - sRPE                    | 15       |
| - Heart rate zones        | 2        |
| External                  |          |
| - Balls bowled or pitched | 5        |
| - GPS / accelerometry     | 10       |
| - Hours                   | 6        |

\* If articles included more than one type of workload variable they are counted more than once. sRPE scores could be the original Foster scale or modified. GPS – Global positioning system. sRPE – Session-rating of perceived exertion (calculated as the product of session intensity on a 1-10 Borg Scale and activity duration in minutes).

#### Measurement frequency

Most included articles (n=32) collected workload data at every session that athletes completed, while 2 studies recorded workload on a weekly basis [39,61].

#### Handling missing data

Twenty-three of the 34 articles (67%) did not report any strategies for missing data. Of those that did, 5 used listwise or casewise deletion, and 6 used estimation. Estimation methods for players missing data included techniques such as: using the full team average values for the drills a player completed [36], using an individual's mean weekly value [38], and multiplying player's pre-season per-minute match data by the number of minutes they played in a match [40].

### **Statistical analysis and reporting in included articles**

#### Data binning/aggregation

Although 32 articles collected daily workload measurements, many aggregated data for analysis. Most (n = 16) summed workload metrics for a total or average weekly workload. Three studies aggregated workload data for the entire year, 3 aggregated data into season periods, 2 aggregated data monthly, and 3 used multiple aggregation strategies.

## Analysis methods

Table 4 summarises the statistical practices of applied researchers investigating the relationship between workload and injury. Although some studies had analysed other primary or secondary objectives, we recorded only the analyses used to investigate the workload – injury relationship.

**Table 4:** The number of studies using various statistical analysis techniques

| Analytical Method                        | N  |
|------------------------------------------|----|
| Correlation                              |    |
| - Pearson                                | 9  |
| - Spearman                               | 1  |
| T-tests                                  |    |
| - Paired and independent samples         | 4  |
| - Independent samples only               | 2  |
| Chi-square tests                         | 1  |
| Repeated measures ANOVA (one or two-way) | 5  |
| Relative risk/rate ratio*                | 8  |
| Regression modelling                     |    |
| - Logistic                               |    |
| o Regular                                | 10 |
| o Generalised Estimating Equation        | 5  |
| o Multilevel                             | 1  |
| - Linear                                 |    |
| o Regular                                | 2  |
| - Poisson                                |    |
| o Generalised Estimating Equation**      | 1  |
| - Multinomial regression                 |    |
| o Regular                                | 1  |
| - Cox proportional hazards model         | 1  |
| - Frailty model                          | 1  |

If articles used more than one statistical method to analyse workload and injury, they are included more than once in the table. We only report analyses used to analyse workload–injury associations, not other analyses reported in the articles (e.g. ANOVA to test for differences in total workloads at separate times of the season).

\* Relative risk here refers to the use of RR as a primary analysis based on risks in different categorical groups, not as an effect estimated from another model. For example, comparing risks among different load groups like Hulin et al., (2014, 2016, 2016) are counted here, whereas Gabbett and Ullah (2012) derived RR from their frailty model, and Clausen et al. (2014) derived RR from their Poisson model, but neither are included in the count for RR.

\*\* Clausen et al. (2014) also report fitting multilevel models, but do not report any of the results – presenting only their GEE findings in results and discussion sections.



### Typical uses of statistical tools

Most studies that used correlations (7/10) measured the association between weekly or monthly workloads and injury incidence at the team level. Of those that used correlation at the individual level, two compared the amount of pre-season sessions with the amount of in-season sessions completed [23,56], while the final compared workload with injury operationalised as a numerical score on the injury subscale of the Recovery-Stress Questionnaire for Athletes (REST-Q) [37].

Group comparisons were sometimes made using t-tests, ANOVAs or chi-square analyses. Typically, unpaired t-tests compared workload variables (e.g. mean sessions/week) between athletes who sustained an injury during the year, to those who did not [43,44]. Paired t-tests and repeated measures ANOVAs (one- or two-way) were most often used to compare the workloads of the same athletes at different time periods. For example, workloads in an 'injury block' (like the week preceding an injury), were compared with non-injury blocks, like other weeks in the season [43,59], or the 4 weeks preceding the injury block [54].

Relative risk approaches were used in two primary ways. First, workload categories were established for the entire year, like cricket bowlers who averaged <2, 2-2.99, 3-3.99, 4-4.99 or >5 days between bowling sessions up until an injury, or for the entire year if they didn't sustain an injury (Dennis, 2003). Risks were calculated as the number of injuries/number of athletes in a given group, and relative risks were calculated to compare across groups [59]. In the second approach, athletes contributed exposures on a weekly basis, and thus contributed to multiple workload classifications. In this case, the likelihood/risk was the number of injuries/number of weekly player exposures to that workload category (Bowen et al., 2016; Hulin et al., 2014, 2016).

As an overall category, regression approaches were the dominant statistical tool (22/34 studies), with multiple types of regression used. The most common approach was logistic regression (binary injury status as the outcome variable), independently or jointly modelling workload variables as independent variables. Generalised estimating equations were used to account for the clustering of observations within players and were used very similarly to simple logistic regression approaches.

### Justifications for statistical approaches

Fifteen of the included articles (44%) did not cite any sources to support their analytical choices (Table 5). Of those that did, most (n=14) cited previous literature in the sports medicine field (Table 5).

**Table 5:** Sources cited to justify analyses used in workload—injury investigations

| Citation Source                            | N  |
|--------------------------------------------|----|
| No references to justify approach          | 15 |
| Previous journal article in field of study | 14 |
| Statistics or methodology article          | 8  |
| Will Hopkins' website (www.sportsci.org/)  | 4  |
| Statistical textbook                       | 3  |

\* Note – if articles cited another source for reason other than analysis (e.g. defining injury incidence), those citations are not included here.

### Addressing analysis assumptions

More than half (n = 20) the included articles did not report on the assumptions underlying their statistical analyses. Among those that did report on analysis assumptions, checks included checks for normality, collinearity of predictor variables in regression analyses [41], sphericity for repeated measures ANOVA [37], overdispersion [39], or correlation structures for generalised estimating equations [60].

### Alignment of authors' statistical models with theoretical model and temporal design challenges

In Table 6 (a more detailed table – Table A2 - is available in Appendix 2), we qualitatively evaluated whether the statistical approaches chosen by the authors in our current review effectively addressed the key themes/challenges presented by the theoretical model and the temporal design (intensive longitudinal data). This table is meant as an analytical tool to guide the reader through the discussion and highlight the themes/challenges of the theoretical model and temporal design, as well as the strengths/weaknesses of the statistical tools used in our included studies. The table is arranged such that the challenges/themes form columns, while the statistical tools form rows. Readers can thus follow a row to see how well a given statistical tool addressed key challenges as used by researchers in our included articles, or they can choose a challenge and follow the column down to see which analyses were used in a way that addressed that challenge adequately. The rows are ordered according to their

1  
2  
3 qualitative 'score'. As one proceeds down the rows, the statistical tools can address more of the temporal design  
4 and theoretical model challenges.  
5

6  
7 We caution the reader that (1) not every possible statistical tool is included in the table, only those used in at least  
8 1 article in our review, and (2) the evaluation is based on whether researchers of our included papers used a test in  
9 a way that addresses a given challenge, not necessarily whether the test is capable of being used in a way that  
10 meets that challenge. For example, a logistic regression analysis conducted using a generalised estimating  
11 equation framework can include multiple explanatory/predictor variables – thereby allowing for a multifactorial  
12 model). However, some authors used GEEs in this way but only used one predictor variable [42,51], so in this  
13 case the GEE did not address the multifactorial theme.  
14  
15  
16  
17  
18  
19  
20  
21  
22  
23

## 24 **DISCUSSION**

25  
26  
27 By design, the theoretical models underpinning the workload—injury field and the temporal design (ILD) were  
28 aligned in all the included articles, but common statistical approaches varied in how adequately they addressed the  
29 key themes needed to align them with the other two components.  
30  
31  
32  
33

### 34 **Consideration #1 – Theoretical theme – multifactorial aetiology**

35 Aetiological models of the last 2 decades have all highlighted the multifactorial nature of athletic injury, with both  
36 internal and external risk factors at play [19,21]. With the growing body of research highlighting the association  
37 of workloads to injury, one challenge is how to address the effects of workloads while incorporating known risk  
38 factors. Few articles in this review incorporated previously identified risk factors and workload into the same  
39 analysis. In some instances, the choice of analyses prevented this from being an option. For example, simple  
40 analyses like t-tests, correlations, and chi-square tests do not allow for multiple variables to be included. In other  
41 instances, the statistical approaches allowed a multifactorial approach (e.g. generalised estimating equations) but  
42 researchers opted to focus on the effects of workloads in isolation [42,51].  
43  
44  
45  
46  
47  
48  
49  
50  
51  
52  
53  
54  
55  
56  
57  
58  
59  
60

**Table 6:** Evaluation of the degree to which authors' use of statistical tools addressed theoretical and temporal design challenges

| Method                                                  | n  | Themes of theoretical model |                                        |                | Themes of temporal design - intensive longitudinal data |                          |                             |                                     |
|---------------------------------------------------------|----|-----------------------------|----------------------------------------|----------------|---------------------------------------------------------|--------------------------|-----------------------------|-------------------------------------|
|                                                         |    | Multifactorial aetiology    | Between and Within-Athlete Differences | Complex System | Includes Time-Varying and Time-Invariant Variables      | Missing/Unbalanced Data* | Repeated Measure Dependency | Incorporates Time into the Analysis |
| Correlation (Pearson and Spearman)                      | 10 | X                           | X                                      | X              | X                                                       | X                        | X                           | X                                   |
| Unpaired t-test                                         | 6  | X                           | X                                      | X              | X                                                       | X                        | X                           | X                                   |
| Chi-square tests                                        | 1  | X                           | X                                      | X              | X                                                       | X                        | X                           | X                                   |
| Relative risk calculations                              | 8  | O                           | X                                      | X              | X                                                       | X                        | X                           | X                                   |
| Regression (logistic, linear, multinomial)              | 13 | O                           | X                                      | X              | X                                                       | X                        | X                           | X                                   |
| Paired t-test                                           | 2  | X                           | X                                      | X              | X                                                       | X                        | ✓                           | ✓                                   |
| Repeated measures ANOVA (one or two-way)                | 5  | O                           | O                                      | X              | O                                                       | X                        | ✓                           | ✓                                   |
| Cox proportional hazards model                          | 1  | ✓                           | X                                      | X              | X                                                       | ✓                        | ✓                           | ✓                                   |
| Generalised Estimating Equations (Poisson and logistic) | 6  | O                           | X                                      | X              | O                                                       | ✓                        | ✓                           | O                                   |
| Multilevel modeling                                     | 2  | ✓                           | ✓                                      | X              | ✓                                                       | ✓                        | ✓                           | X                                   |
| Frailty model                                           | 1  | ✓                           | ✓                                      | X              | ✓                                                       | ✓                        | ✓                           | ✓                                   |

Qualitative assessment performed on a three-tiered scale. An 'X' (red formatting) means that none of the authors using this tool adequately addressed that specific challenge. In some cases, this may be because the statistical model was unable to address it, and other times it may be because of the way they used it. An 'O' (yellow formatting) indicates that some authors addressed that challenge while others did not. This generally happened when the statistical tool could address that challenge but the authors sometimes chose not to use it in that way. A '✓' (green formatting) indicates that all authors using this statistical tool addressed that challenge adequately. \*Missing/unbalanced data here is that caused by intensive longitudinal data – meaning a different number of observations for each athlete during the observation period, some of which may be missing.

1  
2  
3 Other statistical approaches that allow multivariable analyses enabled researchers to examine the effects of  
4 workloads while controlling for known risk factors. Malisoux et al. (2013) used a Cox-proportional hazards model  
5 to control for age and sex while examining the effects of average training volume and intensity. Gabbett and  
6 Ullah's frailty model (2012) incorporated previous injury – a commonly cited injury risk factor – into the  
7 evaluation of the influence of different GPS workloads on injury risk. When investigating multifactorial  
8 phenomena, these types of statistical approaches that enable multiple explanatory variables provide a more  
9 appropriate option.  
10  
11  
12  
13  
14  
15  
16  
17  
18

### 19 **Consideration #2 – Theoretical theme - between and within-athlete differences**

20 One of the primary benefits of ILD is that it enables researchers (when using certain analyses) to differentiate  
21 within-person and between-person effects [3]. In the sports medicine field, this would correspond to researchers  
22 asking, (1) why are some athletes robust against injury (between-person inquiry) while others are 'injury-prone'?  
23 and on the other hand, (2) at what point is a given athlete (within-person inquiry) more likely to sustain an injury?  
24  
25 The simpler statistical approaches used by researchers in our included studies (correlation, t-tests, ANOVAs,  
26 regular regression) are limited in the number of variables they can include, and consequently cannot differentiate  
27 risk between- and within-athletes. Tests of group differences (independent sample t-tests and one-way ANOVAs)  
28 only differentiate between athletes (e.g. injured vs. uninjured), while repeated measures tests (repeated measures  
29 ANOVA and paired t-tests) only examine within-athlete differences (e.g. loads preceding injuries vs. loads during  
30 non-injury weeks).  
31  
32  
33  
34  
35  
36  
37  
38  
39  
40  
41  
42

43 Generalised estimating equations (GEE) were a common statistical choice used to deal with some of the  
44 longitudinal data challenges. However, although they account for the clustering within-persons, they assume the  
45 effects of predictor variables are constant across all athletes [64]. Simple Cox proportional hazards models  
46 (Malisoux et al. 2013) are common in survival analyses, but do not differentiate between- and within-person  
47 effects [65].  
48  
49  
50  
51  
52  
53

54 Only two statistical tools were used in a way that examined between- and within-athlete differences in injury risk.  
55 The frailty model by Gabbett and Ullah (2012) models each athlete as a random effect with a given frailty. The  
56  
57  
58  
59  
60

1  
2  
3 multilevel model by Windt et al., (2016) incorporated athlete-level variables (age, position, pre-season sessions)  
4 and observation-level variables (weekly workload measures). In the latter case, athletes' weekly distances did not  
5 affect their risk of injury in the subsequent week (OR = 0.82 for 1 standard deviation increase, 95% CI = 0.55 to  
6 1.21) – a within-athlete inquiry. However, controlling for weekly distance and the proportion of distance at high  
7 speeds, athletes who had completed more pre-season training had significantly reduced odds of injury (OR = 0.83  
8 for each 10 pre-season sessions, 95% CI = 0.70 to 0.99) – a between-athlete inquiry. These two examples  
9 highlight that certain analyses carry a distinct advantage of allowing researchers to tease out differences both  
10 between- and within- study participants – an important consideration when such differences are of interest.  
11  
12  
13  
14  
15  
16  
17  
18  
19  
20

### 21 **Consideration #3 – Theoretical theme - injury risk as a complex dynamic system**

22 Complex systems are defined, among other things, by the interaction between multiple internal and external  
23 variables that interact to produce an outcome. Simple analyses (t-tests, correlations), which cannot incorporate  
24 multiple variables, cannot examine the interaction between multiple factors. However, even other traditional  
25 analyses which are more effective in handling the challenges of longitudinal data (e.g. generalised estimating  
26 equations, Cox-proportional hazards models) were not used to incorporate non-linear interactions between  
27 predictor variables.  
28  
29  
30  
31  
32  
33  
34

35 As the most recent 'theme' underling athletic injury aetiology, heuristic reviews on injury aetiology have  
36 increasingly presented as complex systems models [24,66]. However, none of the analyses included in our review  
37 analysed intensive longitudinal workload—injury data with statistical analyses that fit within a complex systems  
38 framework. This lack of research may reflect the fact that the suggestion that injury aetiology fits within a  
39 dynamic, complex systems framework is still relatively 'new'. It remains to be seen whether a complex systems  
40 approach and the analyses recommended in such reviews (e.g. self-organising feature maps, classification and  
41 regression trees, agent based models, etc.) are more effective for evaluating the association between workloads  
42 and injury [24].  
43  
44  
45  
46  
47  
48  
49  
50  
51  
52

### 53 **Consideration #4 – ILD challenge – including time-varying and time-invariant variables**

1  
2  
3 Tying back to the theoretical model of workloads and injury, some relevant factors may be relatively stable (time-  
4 invariant) over the course of an observation period (e.g. height, age), while others are time-varying (e.g.  
5 workload). Some analyses can incorporate both time-varying and time-invariant variables, while others are  
6 limited in this respect – and all analyses that cannot or did not address the multifactorial nature of injury cannot  
7 include time-varying and time-invariant variables concurrently. Group difference tests (t-tests, ANOVAs, etc.)  
8 may collect time-varying measures, but must aggregate them into a single average for analysis.  
9  
10  
11  
12  
13  
14  
15

16 Including time-varying and stable variables in the same analysis links closely to between- and within-athlete  
17 differences – with the frailty model [52] and multilevel model [62] both used in a way that allowed the  
18 researchers to include both. The one exception in our included studies was the generalised estimating equation  
19 approach. As mentioned earlier, the GEE assumes an ‘overall’ effect for each explanatory variable, such that  
20 between- and within-athlete differences cannot be differentiated. However, the major benefit to a GEE is that it  
21 accounts for the repeated measures for each participant, and can therefore include both time-invariant and time-  
22 varying variables for each participant.  
23  
24  
25  
26  
27  
28  
29  
30  
31

### 32 **Consideration #5 – ILD challenge – handling missing and unbalanced data**

33  
34 Dealing with missing and unbalanced data is a near certainty when dealing with ILD, and is common in applied  
35 workload-monitoring settings [67]. The approach to missing data is important from both a methodological and  
36 statistical perspective. Statistically, four types of analyses used in this review are robust to missing and  
37 unbalanced data – Cox proportional hazards models, GEEs, multilevel models, and frailty models, where all  
38 observations can be included in the analysis, and athletes can have different numbers of observations.  
39  
40  
41  
42  
43  
44

45 A case could be made that group-difference analyses, like the independent samples or paired t-test, also handle  
46 unbalanced data across different athletes. For example, Dennis et al (2003) compare the average number of balls  
47 bowled per week for injured vs. uninjured bowlers. Some of these bowlers may have contributed 2 weeks of data  
48 before being injured, while others contributed a full season of bowling data and were not injured – in this way,  
49 there are ‘unbalanced’ data. However, we contend that these group difference tests aggregate these data across the  
50 whole season and force all athletes to only have one observation (usually an aggregated statistic like ‘average  
51  
52  
53  
54  
55  
56  
57  
58  
59  
60

1  
2  
3 number of balls bowled per week'. A paired t-test does the same, except it requires all athletes to contribute 2  
4 observations (or in this case, 2 aggregated statistics).  
5  
6

7  
8 Few authors discussed how they handled missing data in cases of technological difficulties, athlete non-  
9 compliance, etc. This is extremely important in cases where authors derive variables like rolling workload  
10 averages (e.g. one-week, 'acute', workloads, four-week average, 'chronic', workloads, etc.) [33,36], 'monotony'  
11 (average weekly workload divided by the standard deviation of that workload) or 'strain' (the monotony  
12 multiplied by the average weekly workload) [30]. Since these measures are all calculated from workloads  
13 accumulated over time, failing to estimate workloads for these missing sessions (that end up being treated as '0'  
14 workload days) means inferences from these derived measures may be unreliable. In these instances – it is  
15 important that researchers report how they accounted for missing data, whether they be strategies employed in the  
16 past – e.g. full team average values (Bowen et al., 2016), weekly individual averages (Brink et al., 2010), player  
17 specific per-minute values by time played (Colby et al., 2014) – or whether through other advanced imputation  
18 methods recommended for ILD [68].  
19  
20  
21  
22  
23  
24  
25  
26  
27  
28  
29  
30

### 31 32 **Challenge #6 – ILD challenge – dependencies created by repeated measures**

33  
34 Collecting ILD in applied sport settings means repeated (often daily) measurements taken from the same athletes  
35 – such that observations are clustered within athletes. Comparisons of independent groups, through chi-square  
36 tests, independent sample t-tests and one-way/two-way ANOVAs all assume participants contribute a single  
37 observation to the analysis and force an aggregated variable (e.g. average number of balls bowled in a week) to  
38 conduct the analysis (Dennis, 2003). Similarly, correlation and simple regression (in its linear, logistic, and  
39 multinomial forms) assume independence of observations [69]. Paired t-tests and repeated measures ANOVA  
40 were used to deal with repeated measurements by comparing the same athletes' workloads at different periods  
41 (e.g. the week before injury vs. weeks that did not precede injury).  
42  
43  
44  
45  
46  
47  
48  
49

50  
51 Of the analyses that addressed this challenge, GEEs were the most common – used in 6 studies. Its ability to  
52 handle clustering was also used in one article to control for players clustering within teams [39]. Cox proportional  
53 hazard models, used in one article [54], can handle repeated measurements for participants [70]. Multilevel  
54  
55  
56  
57  
58  
59



1  
2  
3 models (Windt et al., 2016) and frailty models – an extension of the Cox- proportional hazards model (Gabbett  
4 and Ullah, 2012) – were also used in a single instance each, where repeated measures were clustered within  
5 players through a random player effect.  
6  
7  
8

9  
10 As mentioned in the introduction, there may be additional data dependency created by recurrent injuries [71].  
11 Previous recommendations to handle the recurrent injury challenges have included frailty models [72], and a  
12 multistate framework [73]. However, as so few articles reported collecting information on recurrent injuries (n =  
13 5), we focused primarily on the dependencies caused by repeated measures across participants.  
14  
15  
16  
17

### 18 19 **Challenge #7 – ILD challenge – incorporating time into the analysis / temporality**

20  
21 One of the most relevant questions in ILD analyses is the way that time is accounted for [1,3]. Some authors used  
22 one-way [32] and two-way repeated measures ANOVAs [49] to compare loading in different seasons or season-  
23 periods – a very simple way of accounting for time. Repeated measures ANOVAs [46,54,56] and paired t-tests  
24 [43,59] also account for time by categorising time-periods as pre-injury blocks or non-injury blocks. Multilevel  
25 models have been used to examine change through the interactions of variables with time, but the one multilevel  
26 model used in this review did not include time as a covariate [62]. Survival analyses explicitly account for time by  
27 calculating the effects of variables on the predicted time-to-event [52,54]. Notably, only one analysis – the frailty  
28 model (Gabbett and Ullah, 2012) – adjusted the probability of long-term outcomes (e.g., injury) based on  
29 variations after an initial capture of risk, something few traditional analyses accomplish (Cook 2016).  
30  
31  
32  
33  
34  
35  
36  
37  
38  
39

40  
41 Temporality is also vital in considering potential causal associations. While making causal inferences from  
42 observational data is a topic beyond the scope of this paper, temporality is a well-accepted component of causality  
43 dating back, at least, to Bradford Hill's 'criteria' [74]. Without temporality – where a postulated cause precedes  
44 the outcome – directional associations cannot be made [75,76]. A lack of temporality can also skew associations  
45 since it allows for reverse causality. In the workload—injury field, findings that high weekly workloads are  
46 sometimes associated with lower odds of injury in a given week [60,62] may be in part because players who get  
47 injured in a given week are less likely to accumulate high weekly workloads.  
48  
49  
50  
51  
52  
53  
54

1  
2  
3 Trying to account for temporality, some researchers have included a latent period – where workload variables are  
4 examined for their association with injury occurrence in a given proceeding time window, like the subsequent  
5 week [33,62]. While recent work has noted that the length of the latent period may affect model findings [77], it is  
6 clear that without some type of latent period, any directional inferences between workloads and injury cannot be  
7 made.  
8  
9  
10  
11  
12

### 13 14 **Methodological, statistical and reporting considerations**

#### 15 16 Data aggregation

17  
18 Data aggregation was common, whether in data preparation, or forced through the analysis. In some cases,  
19 researchers aggregated individual level data into team-level measures (total/average workload and injury  
20 incidence). Although 32/34 articles collected daily data, most aggregated these daily data into weekly measures,  
21 potentially contributing to temporality problems if no latent period was included. Finally, certain analyses (e.g.  
22 paired t-tests, simple logistic regression) aggregated data for athletes across an entire year so that workload  
23 measures were used to control for exposure [35,61]. Differences in analyses make it impossible to measure the  
24 effect of fluctuations in workload and potential impact on injury risk. Further, with no latent period, the  
25 directionality of the relationship is unclear. For example, players with high exposure throughout the year were at a  
26 lower injury risk than the intermediate group, but it could be interpreted that players who do not sustain an injury  
27 throughout the year are more likely to accumulate high total training and match exposures (i.e. higher workload)  
28 [35]. Aggregated data may be easier to analyse, but comes at the cost of losing some of the inherent benefits of  
29 collecting ILD. As a result, theory-driven questions that relate to daily workload fluctuations and injury risk will  
30 become challenging, or impossible to answer.  
31  
32  
33  
34  
35  
36  
37  
38  
39  
40  
41  
42  
43  
44  
45  
46

#### 47 Checking model assumptions and fit

48  
49 Authors commonly reported checking was for normality, through Shapiro-Wilk [56] or Kolmogorov-Smirnov  
50 tests [32]. Regression modelling was the most common analysis to investigate the workload—injury association.  
51 In 8/10 simple logistic regression instances, the authors appear to conduct the analyses using weekly observations  
52  
53  
54  
55  
56  
57  
58  
59  
60

1  
2  
3 without accounting for the dependencies created by repeated-measures across players. In all regression instances,  
4 it was uncommon for model assumptions to be checked. Where multiple regression approaches were used,  
5 multicollinearity checks were rarely reported – an important consideration since multicollinearity can be a  
6 problem when multiple workload variables are simultaneously modelled [41].  
7  
8  
9

10  
11 Of the papers that modelled data using regression or similar techniques, six described how they assessed model  
12 fit. Some authors assessed specificity/sensitivity, or receiver operating characteristics, either on the current data  
13 set [61], or future data set (Gabbett, 2010). Other in-sample model fit indices  $R^2$  values [63], Aikeke Information  
14 Criteria (AIC) and Bayesian Information Criteria (BIC), which were sometimes mentioned as guiding the model  
15 selection process [62].  
16  
17  
18  
19  
20  
21

22 While many studies may have under-reported how they assessed model assumptions or fit, others [41] provide an  
23 example for other researchers to emulate. In fitting a GEE to account for intra-team and intra-player clustering  
24 effects, they explained how they selected an appropriate autocorrelation structure, reported how potential  
25 quadratic relationships were assessed in the case of non-linear associations, and described checking for potential  
26 multicollinearity with defined thresholds (variance inflation factor >10) and for their GEE.  
27  
28  
29  
30  
31  
32

### 33 **Researcher ‘trade-offs’, consequences of misalignment**

34 We have used the workload—injury field to highlight seven key themes that emerge from the theoretical model  
35 and temporal design (ILD), and shown how some statistical models either cannot, or were not used in a way that  
36 addresses these themes. In some cases, misalignment may carry a severe cost – like assumption violations that  
37 may bias study results [29]. This is akin to building conclusions on an unstable foundation. Other times,  
38 researchers have properly employed their chosen statistical approach, but the approaches themselves are limited,  
39 and unable to answer research questions that ILD can address. This is more akin to having a grand building plan  
40 and all the necessary supplies, but only using a screwdriver to construct the building.  
41  
42  
43  
44  
45  
46  
47  
48  
49

50 Regular regression models provide an ideal example of researchers’ trade-offs when using traditional statistical  
51 analyses on ILD, and the potential costs of misalignment. Although 13 papers used regular regression to analyse  
52 the association between workloads and injury outcome, they chose one of three paths when dealing with ILD.  
53  
54  
55  
56  
57  
58  
59  
60

1  
2  
3 First, many proceeded to analyse each daily or weekly data point as an independent observation – not addressing  
4 the violation of the independence assumption (e.g. Hulin et al., 2014, 2016; Rogalski et al., 2013). Second, some  
5 researchers aggregated the workload data into an average weekly workload or total workload exposure over the  
6 course of the year, such that each participant contributed only one observation to a classic logistic regression  
7 [35,61]. Although the regression assumptions aren't violated, workload is aggregated into a single metric, the  
8 temporal relationship between workload and injury has been lost, and there is no way to analyse the effects of  
9 workload fluctuations on injury risk. Third, some researchers converted individual data to team level data and  
10 examined team workloads with team injury incidence in a linear regression [48,63]. In this final case, no  
11 differentiation can be made between players or within-players, and inferences are only possible at the team level.  
12 This may be sufficient to inform research on the association of workloads and injury at the team level, but the  
13 theoretical model underpinning team injury rates may be different than those underpinning individual athletes'  
14 injury risk.

### 29 **Bright spots and future directions**

30 Researchers in the sports medicine field should be encouraged that the increased availability of ILD may improve  
31 understanding of athletes' fluctuating injury risks – as articulated by their theoretical models. To capitalise on this  
32 understanding, researchers must choose statistical models that most closely align with their theory, and that  
33 address longitudinal data challenges. Generalised estimating equations, a Cox proportional hazards model, a  
34 multilevel logistic model, and a frailty model were the 4 analyses that most closely approached this alignment.  
35 Although, these are not the only options available to researchers.

36 More advanced statistical techniques for longitudinal data are increasingly being developed and implemented  
37 across disciplines. This will enable sports medicine researchers to answer their theory-driven questions while  
38 taking full advantage of the benefits of ILD. Functional data analysis [78], machine learning approaches [79,80],  
39 generalised estimating equations [81], mixed effects/multilevel/hierarchical models [82], time series analysis [83],  
40 survival analyses like shared frailty models [72,84], and time-varying effect models [85] all show promise for  
41 ILD.

1  
2  
3 Since the search for this current review was conducted, there have been some promising developments in the  
4 sports medicine field. Recent publications have applied statistical models that more appropriately take advantage  
5 of the strengths inherent to ILD, and better align with the theoretical frameworks [79–81,86–88].  
6  
7  
8  
9

10 Mediation and moderation are causal models which may also contribute to theoretical models [89]. We recently  
11 proposed that traditional intrinsic and extrinsic risk factors may act as moderators of the workload—injury  
12 association [90]. If that is true, the most appropriate statistical model would be one that incorporates workload  
13 measures as the variable of interest, and includes other risk factors as interaction terms that act as ‘effect-measure  
14 modifiers’ [91]. While none of the included articles performed such an analysis, a recent study (not included in  
15 this review because it was published after our search) adopted this approach [86]. Møller et al. used a frailty  
16 model with weekly workload fluctuations (decrease or <20% increase, 20-60% increase, and >60% increase) as  
17 the primary predictor variable in a frailty model. Known shoulder risk factors were treated as ‘effect measure  
18 modifiers’, so the model was stratified based on the presence or absence of a given risk factor (e.g. scapular  
19 dyskinesia). In so doing, the researchers used a statistical tool (Component #3) that addressed all the challenges  
20 inherent to longitudinal data (Component #2), conducting a multifactorial analysis that clearly differentiated both  
21 within- and between-athlete injury risk – key aspects of the theoretical model (Component #1).  
22  
23  
24  
25  
26  
27  
28  
29  
30  
31  
32  
33  
34  
35

36 We encourage collaboration between applied researchers and statisticians. More sophisticated models may better  
37 suit ILD, but come with increased complexity and the need for in-depth understanding that statisticians can  
38 provide. However, these complex approaches will only have value where they align with the theoretical models  
39 underpinning the specific research field. Based on our included papers, there is an opportunity for improved  
40 collaboration, as few researchers referenced any methodological or statistical references to justify their analytical  
41 approaches. In some instances, this may be attributable to using common, relatively simple analyses – one likely  
42 doesn’t expect a citation for a t-test. Where such references existed, they were often to previous papers in the  
43 field, not statistical sources. In future longitudinal analyses, we encourage researchers to partner with a  
44 statistician, psychometrician, biostatistician, etc., working together to facilitate more optimal, theory-driven  
45 approaches [92].  
46  
47  
48  
49  
50  
51  
52  
53  
54  
55  
56  
57  
58  
59  
60

### Review limitations

Previous systematic reviews investigating the workload—injury relationship have documented the challenges of identifying articles through classic systematic review search strategies [7,9]. Heterogeneous key word use and the breadth of sporting contexts have meant previous systematic reviews include many articles post-hoc that were not originally identified by their systematic searches (29 of 67 articles in Jones, 12 of 35 articles in Drew/Finch). Therefore, although we worked to identify articles through 6 systematic reviews and the IOC consensus statement, there may have been potentially eligible articles that were not found.

We used the cut-off for intensive longitudinal data (>20 observations) proposed by Collins (2006). However, there is no universal cut-off for ILD, with previous thresholds of ‘more than a handful’ [1], ten observations [93], or 40 [3].

It is possible that we are a little unfair to some papers. For example, they may have chosen analyses that aligned with ‘their’ theoretical model at the time, not what is considered the most current theoretical model. However, most papers were published since 2010 – the dynamic, recursive aetiology model was introduced in 2007 (Meeuwisse, 2007), and the multifactorial nature of injury risk has been highlighted since 1994 (Meeuwisse, 1994). As complex systems approaches are the most recently proposed theoretical model (Bittencourt et al., 2016, Hulme et al., 2015), it is not surprising that none of the included articles analysed the data within this type of framework. Although heuristically appealing, it remains to be seen whether complex systems approaches are effective for analysing workload—injury data. It may also be the case that some environments (e.g. non-professional) lacked the resources to collect multiple variables, limiting their ability to conduct multifactorial analyses.

Finally, it was beyond the scope of this review to list every challenge posed by ILD, and we are not exhaustive in our discussion of different analyses and their capacity to handle the challenges that we did highlight. Where possible, we have tried to identify the themes that are most common within the sports medicine field. Ultimately, the goal of the paper is not that statistical tools should guide our practice, but that statistical tools are more

1  
2  
3 thoughtfully chosen so that the extensive work put into theory building and data collection is not short-changed by  
4  
5 a sub-optimal statistical model.  
6

## 7 8 **CONCLUSION** 9

10 We used studies investigating the relationship between workloads and injury as substrate to remind sports  
11  
12 medicine researchers how important it is to align their theoretical model, temporal design, and statistical model. In  
13  
14 longitudinal research, thoughtfully chosen statistical analyses are those grounded in subject matter theory and that  
15  
16 maximise the utility of the collected data. The three most common analyses in our included papers (logistic  
17  
18 regression, correlations, and relative risk calculations) addressed one or none of the 3 key theoretical themes, and  
19  
20 one or fewer of the 4 inherent challenges of intensive longitudinal data. In this example discipline, researchers  
21  
22 have developed sophisticated theories and frequently collect data that will enable them to test these theoretical  
23  
24 models. The missing step, and future opportunity for researchers is to avail themselves of all the tools at their  
25  
26 disposal – choosing statistical models that address the ILD challenges and answer theory-driven research  
27  
28 questions.  
29  
30  
31  
32  
33  
34  
35  
36  
37  
38  
39  
40  
41  
42  
43  
44  
45  
46  
47  
48  
49  
50  
51  
52  
53  
54  
55  
56  
57  
58  
59  
60

1  
2  
3 **Contributions:** JW and TG searched for, screened, and identified appropriate systematic reviews and  
4 consensus statements. JW identified appropriate original data papers from included systematic  
5 reviews/consensus statements. JW and CA performed quality assessment of original data papers and  
6 coded the study methods. BZ provided the statistical feedback on the creation of the data extraction  
7 spreadsheet and advice on the approach of the methodological review. JW and BZ completed the  
8 qualitative assessment of whether authors' use of statistical tools aligned with theoretical or temporal  
9 design themes. BS, CA, BZ and KK provided early input during early stages of study development CC  
10 contributed to the original idea for the review, and contributed to the discussion section of the  
11 manuscript. JW compiled the first draft of the manuscript. CA, CC, BS, BZ, and KK all contributed to  
12 critical revision of multiple drafts of the current manuscript.  
13  
14  
15

16 **Acknowledgements:** The United States Coalition for the Prevention of Illness & Injury in Sport is a  
17 partner in the United States Coalition for the Prevention of Illness and Injury in Sport an International  
18 Research Centres for Prevention of Injury and Protection of Athlete Health supported by the  
19 International Olympic Committee (IOC).  
20  
21

22 Technical or equipment support for this study was not provided by any outside companies,  
23 manufacturers or organizations.  
24

25 **Funding:** JW was a Vanier Scholar funded by the Canadian Institutes of Health Research.  
26

27 **Competing interests:** None  
28

29 **Provenance and peer review:** Not commissioned, externally peer reviewed.  
30

31 **Ethics approval:** No ethics approval was sought for conducting this methodological review.  
32  
33  
34  
35  
36  
37  
38  
39  
40  
41  
42  
43  
44  
45  
46  
47  
48  
49  
50  
51  
52  
53  
54  
55  
56  
57  
58  
59  
60



## REFERENCES

- 1 Walls TA, Schafer JL. *Models for intensive longitudinal data*. Oxford [U.K.]: : Oxford University Press 2006. <http://www.loc.gov/catdir/enhancements/fy0636/2005047269-t.html> (accessed 13 Apr 2016).
- 2 Ginexi EM, Riley W, Atienza AA, *et al*. The promise of intensive longitudinal data capture for behavioral health research. *Nicotine Tob Res Off J Soc Res Nicotine Tob* 2014;**16 Suppl 2**:S73–5. doi:10.1093/ntr/ntt273
- 3 Hamaker EL, Wichers M. No Time Like the Present: Discovering the Hidden Dynamics in Intensive Longitudinal Data. *Curr Dir Psychol Sci* 2017;**26**:10–5. doi:10.1177/0963721416666518
- 4 Halson SL. Monitoring Training Load to Understand Fatigue in Athletes. *Sports Med* 2014;**44**:139–47. doi:10.1007/s40279-014-0253-z
- 5 McCall A, Carling C, Nedelec M, *et al*. Risk factors, testing and preventative strategies for non-contact injuries in professional football: current perceptions and practices of 44 teams from various premier leagues. *Br J Sports Med* 2014;**48**:1352–7. doi:10.1136/bjsports-2014-093439
- 6 Akenhead R, Nassis GP. Training Load and Player Monitoring in High-Level Football: Current Practice and Perceptions. *Int J Sports Physiol Perform* Published Online First: 9 October 2015. doi:10.1123/ijsp.2015-0331
- 7 Jones CM, Griffiths PC, Mellalieu SD. Training Load and Fatigue Marker Associations with Injury and Illness: A Systematic Review of Longitudinal Studies. *Sports Med* 2016;:1–32. doi:10.1007/s40279-016-0619-5
- 8 Black GM, Gabbett TJ, Cole MH, *et al*. Monitoring Workload in Throwing-Dominant Sports: A Systematic Review. *Sports Med* 2016;:1–14. doi:10.1007/s40279-016-0529-6
- 9 Drew MK, Finch CF. The Relationship Between Training Load and Injury, Illness and Soreness: A Systematic and Literature Review. *Sports Med* 2016;:1–23. doi:10.1007/s40279-015-0459-8
- 10 Gabbett TJ, Whyte DG, Hartwig TB, *et al*. The Relationship Between Workloads, Physical Performance, Injury and Illness in Adolescent Male Football Players. *Sports Med* 2014;**44**:989–1003. doi:10.1007/s40279-014-0179-5
- 11 Soligard T, Schweltnus M, Alonso J-M, *et al*. How much is too much? (Part 1) International Olympic Committee consensus statement on load in sport and risk of injury. *Br J Sports Med* 2016;**50**:1030–41. doi:10.1136/bjsports-2016-096581
- 12 Keselman HJ, Huberty CJ, Lix LM, *et al*. Statistical Practices of Educational Researchers: An Analysis of Their ANOVA, MANOVA, and ANCOVA Analyses. *Rev Educ Res* 1998;**68**:350–86. doi:10.2307/1170601
- 13 Weir A, Rabia S, Ardern C. Trusting systematic reviews and meta-analyses: all that glitters is not gold! *Br J Sports Med* 2016;:bjsports-2015-095896. doi:10.1136/bjsports-2015-095896

- 1  
2  
3 14 Collins L. Analysis of Longitudinal Data: The Integration of Theoretical Model, Temporal  
4 Design, and Statistical Model. *Annu Rev Psychol* 2006;**57**:505–28.  
5 doi:10.1146/annurev.psych.57.102904.190146  
6
- 7 15 Lemon SC, Wang ML, Haughton CF, *et al.* Methodological quality of behavioural weight loss  
8 studies: a systematic review. *Obes Rev* 2016;:n/a-n/a. doi:10.1111/obr.12412  
9
- 10 16 Gabbett TJ, Nassis GP, Oetter E, *et al.* The athlete monitoring cycle: a practical guide to  
11 interpreting and applying training monitoring data. *Br J Sports Med* 2017;:bjssports-2016-097298.  
12 doi:10.1136/bjssports-2016-097298  
13
- 14 17 Olivier B, Taljaard T, Burger E, *et al.* Which Extrinsic and Intrinsic Factors are Associated with  
15 Non-Contact Injuries in Adult Cricket Fast Bowlers? *Sports Med* 2015;:1–23. doi:10.1007/s40279-015-  
16 0383-y  
17
- 18 18 Whittaker JL, Small C, Maffey L, *et al.* Risk factors for groin injury in sport: an updated  
19 systematic review. *Br J Sports Med* 2015;**49**:803–9. doi:10.1136/bjssports-2014-094287  
20
- 21 19 Bahr R, Holme I. Risk factors for sports injuries — a methodological approach. *Br J Sports Med*  
22 2003;**37**:384–92. doi:10.1136/bjssm.37.5.384  
23
- 24 20 Bahr R, Krosshaug T. Understanding injury mechanisms: a key component of preventing injuries  
25 in sport. *Br J Sports Med* 2005;**39**:324–9. doi:10.1136/bjssm.2005.018341  
26
- 27 21 Meeuwisse WH. Assessing Causation in Sport Injury: A Multifactorial Model. *Clin J Sport Med*  
28 1994;**4**:166–170.  
29
- 30 22 Meeuwisse WH, Tyreman H, Hagel B, *et al.* A Dynamic Model of Etiology in Sport Injury: The  
31 Recursive Nature of Risk and Causation. *Clin J Sport Med* 2007;**17**:215–9.  
32 doi:10.1097/JSM.0b013e3180592a48  
33
- 34 23 Windt J, Gabbett TJ. How do training and competition workloads relate to injury? The  
35 workload—injury aetiology model. *Br J Sports Med* 2016;:bjssports-2016-096040. doi:10.1136/bjssports-  
36 2016-096040  
37
- 38 24 Bittencourt NFN, Meeuwisse WH, Mendonça LD, *et al.* Complex systems approach for sports  
39 injuries: moving from risk factor identification to injury pattern recognition—narrative review and new  
40 concept. *Br J Sports Med* 2016;:bjssports-2015-095850. doi:10.1136/bjssports-2015-095850  
41
- 42 25 Hulme A, Salmon PM, Nielsen RO, *et al.* Closing Pandora’s Box: adapting a systems  
43 ergonomics methodology for better understanding the ecological complexity underpinning the  
44 development and prevention of running-related injury. *Theor Issues Ergon Sci* 2017;**18**:338–59.  
45 doi:10.1080/1463922X.2016.1274455  
46
- 47 26 Cook C. Predicting future physical injury in sports: it’s a complicated dynamic system. *Br J*  
48 *Sports Med* 2016;:bjssports-2016-096445. doi:10.1136/bjssports-2016-096445  
49  
50  
51  
52  
53  
54  
55  
56  
57  
58  
59  
60

- 1  
2  
3 27 Sun L, Wu R. Mapping complex traits as a dynamic system. *Phys Life Rev* 2015;**13**:155–85.  
4 doi:10.1016/j.plrev.2015.02.007  
5
- 6 28 Hoffman L. *Longitudinal Analysis: Modeling Within-Person Fluctuation and Change*. Routledge  
7 2014. <http://www.tandfebooks.com/isbn/9781315744094> (accessed 8 Apr 2016).  
8
- 9 29 Wilkinson M, Akenhead R. Violation of statistical assumptions in a recent publication? *Int J*  
10 *Sports Med* 2013;**34**:281. doi:10.1055/s-0032-1331775  
11
- 12 30 Anderson L, Triplett-McBride T, Foster C, *et al*. Impact of training patterns on incidence of  
13 illness and injury during a women's collegiate basketball season. *J Strength Cond Res* 2003;**17**:734–8.  
14
- 15 31 Brooks JHM, Fuller CW, Kemp SPT, *et al*. An assessment of training volume in professional  
16 rugby union and its impact on the incidence, severity, and nature of match and training injuries. *J Sports*  
17 *Sci* 2008;**26**:863–73. doi:10.1080/02640410701832209  
18
- 19 32 Killen NM, Gabbett TJ, Jenkins DG. Training Loads and Incidence of Injury During the  
20 Preseason in Professional Rugby League Players: *J Strength Cond Res* 2010;**24**:2079–84.  
21 doi:10.1519/JSC.0b013e3181ddafff  
22
- 23 33 Hulin BT, Gabbett TJ, Blanch P, *et al*. Spikes in acute workload are associated with increased  
24 injury risk in elite cricket fast bowlers. *Br J Sports Med* 2014;**48**:708–12. doi:10.1136/bjsports-2013-  
25 092524  
26
- 27 34 Fuller CW, Ekstrand J, Junge A, *et al*. Consensus statement on injury definitions and data  
28 collection procedures in studies of football (soccer) injuries. *Br J Sports Med* 2006;**40**:193–201.  
29 doi:10.1136/bjism.2005.025270  
30
- 31 35 Arnason A, Sigurdsson SB, Gudmundsson A, *et al*. Risk Factors for Injuries in Football. *Am J*  
32 *Sports Med* 2004;**32**:5S–16S. doi:10.1177/0363546503258912  
33
- 34 36 Bowen L, Gross AS, Gimpel M, *et al*. Accumulated workloads and the acute:chronic workload  
35 ratio relate to injury risk in elite youth football players. *Br J Sports Med* 2016;**;**bjsports-2015-095820.  
36 doi:10.1136/bjsports-2015-095820  
37
- 38 37 Bresciani G, Cuevas MJ, Garatachea N, *et al*. Monitoring biological and psychological measures  
39 throughout an entire season in male handball players. *Eur J Sport Sci* 2010;**10**:377–84.  
40 doi:10.1080/17461391003699070  
41
- 42 38 Brink MS, Nederhof E, Visscher C, *et al*. Monitoring load, recovery, and performance in young  
43 elite soccer players. *J Strength Cond Res Natl Strength Cond Assoc* 2010;**24**:597–603.  
44 doi:10.1519/JSC.0b013e3181c4d38b  
45
- 46 39 Clausen MB, Zebis MK, Møller M, *et al*. High Injury Incidence in Adolescent Female Soccer.  
47 *Am J Sports Med* 2014;**42**:2487–94. doi:10.1177/0363546514541224  
48  
49  
50  
51  
52  
53  
54  
55  
56  
57  
58  
59  
60

- 1  
2  
3 40 Colby MJ, Dawson B, Heasman J, *et al.* Accelerometer and GPS-Derived Running Loads and  
4 Injury Risk in Elite Australian Footballers: *J Strength Cond Res* 2014;**28**:2244–52.  
5 doi:10.1519/JSC.0000000000000362  
6
- 7 41 Cross MJ, Williams S, Trewartha G, *et al.* The Influence of In-Season Training Loads on Injury  
8 Risk in Professional Rugby Union. *Int J Sports Physiol Perform* Published Online First: 26 August  
9 2015. doi:10.1123/ijsp.2015-0187  
10
- 11 42 Dennis R, Farhart P, Clements M, *et al.* The relationship between fast bowling workload and  
12 injury in first-class cricketers: a pilot study. *J Sci Med Sport Sports Med Aust* 2004;**7**:232–6.  
13  
14
- 15 43 Dennis R, Farhart R, Goumas C, *et al.* Bowling workload and the risk of injury in elite cricket  
16 fast bowlers. *J Sci Med Sport* 2003;**6**:359–67. doi:10.1016/S1440-2440(03)80031-2  
17  
18
- 19 44 Dennis RJ, Finch CF, Farhart PJ. Is bowling workload a risk factor for injury to Australian junior  
20 cricket fast bowlers? *Br J Sports Med* 2005;**39**:843–6. doi:10.1136/bjism.2005.018515  
21
- 22 45 Duhig S, Shield AJ, Opar D, *et al.* Effect of high-speed running on hamstring strain injury risk.  
23 *Br J Sports Med* 2016;:bjssports-2015-095679. doi:10.1136/bjssports-2015-095679  
24
- 25 46 Ehrmann FE, Duncan CS, Sindhusake D, *et al.* GPS and Injury Prevention in Professional  
26 Soccer. *J Strength Cond Res* Published Online First: 2015. doi:10.1519/JSC.0000000000001093  
27  
28
- 29 47 Gabbett TJ. The development and application of an injury prediction model for noncontact, soft-  
30 tissue injuries in elite collision sport athletes. *J Strength Cond Res* 2010;**24**:2593–603.  
31 doi:10.1519/JSC.0b013e3181f19da4  
32
- 33 48 Gabbett TJ. Influence of training and match intensity on injuries in rugby league. *J Sports Sci*  
34 2004;**22**:409–17. doi:10.1080/02640410310001641638  
35
- 36 49 Gabbett TJ. Reductions in pre-season training loads reduce training injury rates in rugby league  
37 players. *Br J Sports Med* 2004;**38**:743–9. doi:10.1136/bjism.2003.008391  
38
- 39 50 Gabbett TJ, Jenkins DG. Relationship between training load and injury in professional rugby  
40 league players. *J Sci Med Sport* 2011;**14**:204–9. doi:10.1016/j.jsams.2010.12.002  
41  
42
- 43 51 Gabbett TJ, Domrow N. Relationships between training load, injury, and fitness in sub-elite  
44 collision sport athletes. *J Sports Sci* 2007;**25**:1507–19. doi:10.1080/02640410701215066  
45
- 46 52 Gabbett TJ, Ullah S. Relationship Between Running Loads and Soft-Tissue Injury in Elite Team  
47 Sport Athletes. *J Strength Cond Res* 2012;**26**:953–60. doi:10.1519/JSC.0b013e3182302023  
48
- 49 53 Hulin BT, Gabbett TJ, Caputi P, *et al.* Low chronic workload and the acute:chronic workload  
50 ratio are more predictive of injury than between-match recovery time: a two-season prospective cohort  
51 study in elite rugby league players. *Br J Sports Med* 2016;:bjssports-2015-095364. doi:10.1136/bjssports-  
52 2015-095364  
53  
54  
55  
56  
57  
58  
59  
60

- 1  
2  
3 54 Malisoux L, Frisch A, Urhausen A, *et al.* Monitoring of sport participation and injury risk in  
4 young athletes. *J Sci Med Sport* 2013;**16**:504–8. doi:10.1016/j.jsams.2013.01.008  
5
- 6 55 Mallo J, Dellal A. Injury risk in professional football players with special reference to the  
7 playing position and training periodization. *J Sports Med Phys Fitness* 2012;**52**:631–8.  
8
- 9 56 Murray NB, Gabbett TJ, Townshend AD, *et al.* Individual and combined effects of acute and  
10 chronic running loads on injury risk in elite Australian footballers. *Scand J Med Sci Sports* 2016;;n/a-  
11 n/a. doi:10.1111/sms.12719  
12  
13
- 14 57 Murray NB, Gabbett TJ, Townshend AD. Relationship Between Pre-Season Training Load and  
15 In-Season Availability in Elite Australian Football Players. *Int J Sports Physiol Perform* 2016;;1–21.  
16 doi:10.1123/ijsp.2015-0806  
17
- 18 58 Rogalski B, Dawson B, Heasman J, *et al.* Training and game loads and injury risk in elite  
19 Australian footballers. *J Sci Med Sport* 2013;**16**:499–503. doi:10.1016/j.jsams.2012.12.004  
20  
21
- 22 59 Saw R, Dennis RJ, Bentley D, *et al.* Throwing workload and injury risk in elite cricketers. *Br J*  
23 *Sports Med* 2011;**45**:805–8. doi:10.1136/bjism.2009.061309  
24
- 25 60 Veugelers KR, Young WB, Fahrner B, *et al.* Different methods of training load quantification  
26 and their relationship to injury and illness in elite Australian football. *J Sci Med Sport* 2015;**19**:24–8.  
27 doi:10.1016/j.jsams.2015.01.001  
28
- 29 61 Visnes H, Bahr R. Training volume and body composition as risk factors for developing  
30 jumper’s knee among young elite volleyball players. *Scand J Med Sci Sports* 2013;**23**:607–13.  
31 doi:10.1111/j.1600-0838.2011.01430.x  
32  
33
- 34 62 Windt J, Gabbett TJ, Ferris D, *et al.* Training load--injury paradox: is greater preseason  
35 participation associated with lower in-season injury risk in elite rugby league players? *Br J Sports Med*  
36 2016;;bjsports-2016-095973. doi:10.1136/bjsports-2016-095973  
37
- 38 63 Owen AL, Forsyth JJ, Wong DP, *et al.* Heart rate-based training intensity and its impact on  
39 injury incidence among elite-level professional soccer players. *J Strength Cond Res Natl Strength Cond*  
40 *Assoc* 2015;**29**:1705–12. doi:10.1519/JSC.0000000000000810  
41  
42
- 43 64 Ghisletta P, Spini D. An Introduction to Generalized Estimating Equations and an Application to  
44 Assess Selectivity Effects in a Longitudinal Study on Very Old Individuals. *J Educ Behav Stat*  
45 2004;**29**:421–37. doi:10.3102/10769986029004421  
46
- 47 65 Bellera CA, MacGrogan G, Debled M, *et al.* Variables with time-varying effects and the Cox  
48 model: Some statistical concepts illustrated with a prognostic factor study in breast cancer. *BMC Med*  
49 *Res Methodol* 2010;**10**:20. doi:10.1186/1471-2288-10-20  
50  
51
- 52 66 Hulme A, Finch CF. From monocausality to systems thinking: a complementary and alternative  
53 conceptual approach for better understanding the development and prevention of sports injury. *Inj*  
54 *Epidemiol* 2015;**2**. doi:10.1186/s40621-015-0064-1  
55  
56  
57  
58  
59  
60



- 1  
2  
3 67 Buchheit M. Applying the acute:chronic workload ratio in elite football: worth the effort? *Br J Sports Med* 2016;:bjssports-2016-097017. doi:10.1136/bjssports-2016-097017  
4  
5  
6 68 Collins N, Crossley K, Beller E, *et al*. Foot orthoses and physiotherapy in the treatment of  
7 patellofemoral pain syndrome: randomised clinical trial. *Br J Sports Med* 2009;**43**:163–8.  
8 doi:10.1136/bmj.a1735  
9  
10 69 McDonald JH. *Handbook of biological statistics*. Sparky House Publishing Baltimore, MD 2009.  
11 <http://biostathandbook.com/HandbookBioStatSecond.pdf>  
12  
13  
14 70 Therneau TM, Grambsch PM. *Modeling survival data: extending the Cox model*. New York: :  
15 Springer 2000.  
16  
17 71 Finch CF, Cook J. Categorising sports injuries in epidemiological studies: the subsequent injury  
18 categorisation (SIC) model to address multiple, recurrent and exacerbation of injuries. *Br J Sports Med*  
19 2014;**48**:1276–80. doi:10.1136/bjssports-2012-091729  
20  
21 72 Ullah S, Gabbett TJ, Finch CF. Statistical modelling for recurrent events: an application to sports  
22 injuries. *Br J Sports Med* 2014;**48**:1287–93. doi:10.1136/bjssports-2011-090803  
23  
24 73 Shrier I, Steele RJ, Zhao M, *et al*. A multistate framework for the analysis of subsequent injury  
25 in sport (M-FASIS). *Scand J Med Sci Sports* 2016;**26**:128–39. doi:10.1111/sms.12493  
26  
27 74 Hill AB. The Environment and Disease: Association or Causation? *Proc R Soc Med*  
28 1965;**58**:295–300.  
29  
30 75 Höfler M. The Bradford Hill considerations on causality: a counterfactual perspective. *Emerg*  
31 *Themes Epidemiol* 2005;**2**:11. doi:10.1186/1742-7622-2-11  
32  
33 76 Rothman KJ, Greenland S. Causation and causal inference in epidemiology. *Am J Public Health*  
34 2005;**95 Suppl 1**:S144-150. doi:10.2105/AJPH.2004.059204  
35  
36 77 Carey DL, Blanch P, Ong K-L, *et al*. Training loads and injury risk in Australian football—  
37 differing acute: chronic workload ratios influence match injury risk. *Br J Sports Med* 2016;:bjssports-  
38 2016-096309. doi:10.1136/bjssports-2016-096309  
39  
40 78 Trail JB, Collins LM, Rivera DE, *et al*. Functional data analysis for dynamical system  
41 identification of behavioral processes. *Psychol Methods* 2014;**19**:175–87. doi:10.1037/a0034035  
42  
43 79 Carey DL, Ong K-L, Whiteley R, *et al*. Predictive modelling of training loads and injury in  
44 Australian football. *ArXiv170604336 Stat* Published Online First: 14 June  
45 2017.<http://arxiv.org/abs/1706.04336>  
46  
47 80 Rossi A, Pappalardo L, Cintia P, *et al*. Effective injury prediction in professional soccer with  
48 GPS data and machine learning. *ArXiv170508079 Stat* Published Online First: 23 May  
49 2017.<http://arxiv.org/abs/1705.08079>  
50  
51  
52  
53  
54  
55  
56  
57  
58  
59  
60

- 1  
2  
3 81 Colby MJ, Dawson B, Peeling P, *et al.* Multivariate modelling of subjective and objective  
4 monitoring data improve the detection of non-contact injury risk in elite Australian footballers. *J Sci*  
5 *Med Sport* Published Online First:  
6 2017.<http://www.sciencedirect.com/science/article/pii/S144024401730436X>  
7
- 8  
9 82 Smith DM, Walls TA. Multiple Time Scale Models in Sport and Exercise Science. *Meas Phys*  
10 *Educ Exerc Sci* 2016;**20**:185–99. doi:10.1080/1091367X.2016.1195390  
11
- 12 83 de Haan-Rietdijk S, Kuppens P, Hamaker EL. What's in a Day? A Guide to Decomposing the  
13 Variance in Intensive Longitudinal Data. *Front Psychol* 2016;**7**. doi:10.3389/fpsyg.2016.00891  
14
- 15 84 Nielsen RØ, Malisoux L, Møller M, *et al.* Shedding Light on the Etiology of Sports Injuries: A  
16 Look Behind the Scenes of Time-to-Event Analyses. *J Orthop Sports Phys Ther* 2016;**46**:300–11.  
17 doi:10.2519/jospt.2016.6510  
18
- 19  
20 85 Biddle SJH, Edwardson CL, Wilmot EG, *et al.* A Randomised Controlled Trial to Reduce  
21 Sedentary Time in Young Adults at Risk of Type 2 Diabetes Mellitus: Project STAND (Sedentary Time  
22 ANd Diabetes). *PLOS ONE* 2015;**10**:e0143398. doi:10.1371/journal.pone.0143398  
23
- 24 86 Møller M, Nielsen RO, Attermann J, *et al.* Handball load and shoulder injury rate: a 31-week  
25 cohort study of 679 elite youth handball players. *Br J Sports Med* 2017;**51**:231–7. doi:10.1136/bjsports-  
26 2016-096927  
27
- 28 87 Stares J, Dawson B, Peeling P, *et al.* Identifying high risk loading conditions for in-season injury  
29 in elite Australian football players. *J Sci Med Sport* Published Online First: 25 May 2017.  
30 doi:10.1016/j.jsams.2017.05.012  
31
- 32  
33 88 Williams S, Trewartha G, Cross MJ, *et al.* Monitoring What Matters: A Systematic Process for  
34 Selecting Training Load Measures. *Int J Sports Physiol Perform* 2016;:1–20. doi:10.1123/ijsp.2016-  
35 0337  
36
- 37 89 Wu AD, Zumbo BD. Understanding and Using Mediators and Moderators. *Soc Indic Res*  
38 2007;**87**:367. doi:10.1007/s11205-007-9143-1  
39
- 40  
41 90 Windt J, Zumbo BD, Sporer B, *et al.* Why do workload spikes cause injuries, and which athletes  
42 are at higher risk? Mediators and moderators in workload–injury investigations. *Br J Sports Med*  
43 2017;:bjsports-2016-097255. doi:10.1136/bjsports-2016-097255  
44
- 45 91 Nielsen RO, Bertelsen ML, Møller M, *et al.* Training load and structure-specific load:  
46 applications for sport injury causality and data analyses. *Br J Sports Med* 2017;:bjsports-2017-097838.  
47 doi:10.1136/bjsports-2017-097838  
48
- 49  
50 92 Casals M, Finch CF. Sports Biostatistician: a critical member of all sports science and medicine  
51 teams for injury prevention. *Inj Prev* 2016;:injuryprev-2016-042211. doi:10.1136/injuryprev-2016-  
52 042211  
53
- 54 93 Tan X, Shiyko MP, Li R, *et al.* A time-varying effect model for intensive longitudinal data.  
55 *Psychol Methods* 2012;**17**:61–77. doi:10.1037/a0025814  
56  
57  
58  
59

1  
2  
3  
4  
5  
6  
7  
8  
9  
10  
11  
12  
13  
14  
15  
16  
17  
18  
19  
20  
21  
22  
23  
24  
25  
26  
27  
28  
29  
30  
31  
32  
33  
34  
35  
36  
37  
38  
39  
40  
41  
42  
43  
44  
45  
46  
47  
48  
49  
50  
51  
52  
53  
54  
55  
56  
57  
58  
59  
60

For peer review only



1  
2  
3  
4  
5  
6  
7  
8  
9  
10  
11  
12  
13  
14  
15  
16  
17  
18  
19  
20  
21  
22  
23  
24  
25  
26  
27  
28  
29  
30  
31  
32  
33  
34  
35  
36  
37  
38  
39  
40  
41  
42  
43  
44  
45  
46  
47  
48  
49  
50  
51  
52  
53  
54  
55  
56  
57  
58  
59  
60

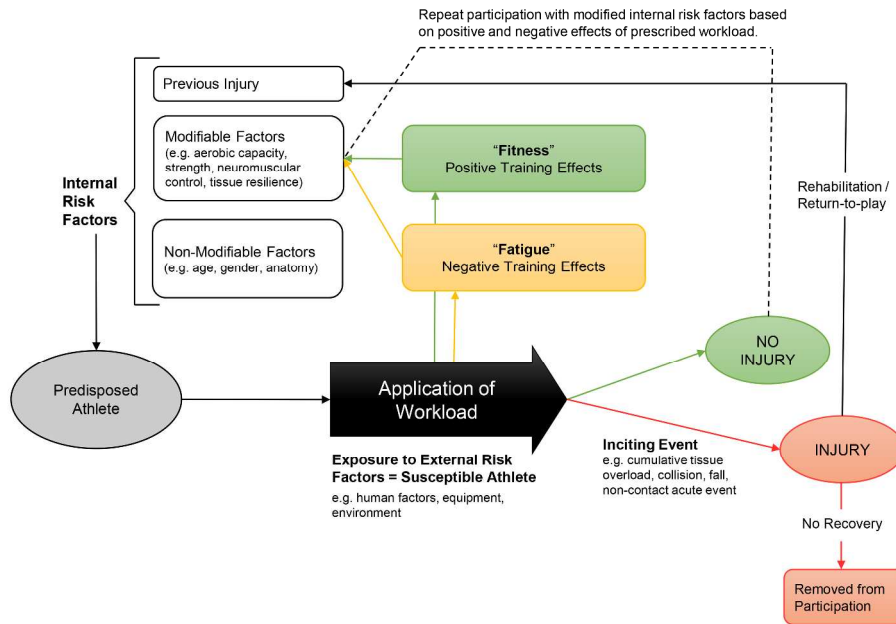

Figure 1 – The workload—injury aetiology model. Key features include the multifactorial nature of injury, between- and within- athlete differences in risk, and a recursive loop.

299x199mm (300 x 300 DPI)

iew only

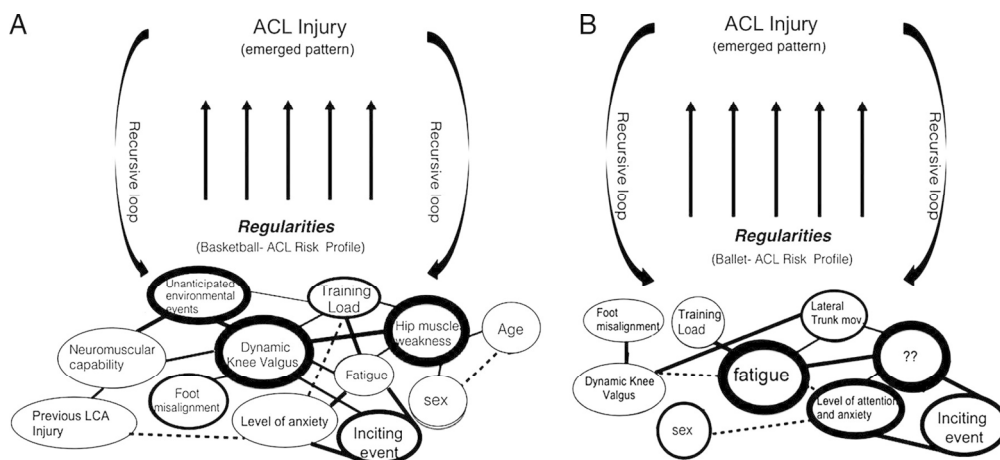

Figure 2 – Complex systems model of athletic injury. Web of determinants are shown for an ACL injury in basketball players (A), and in a ballet dancer (B)

152x69mm (300 x 300 DPI)

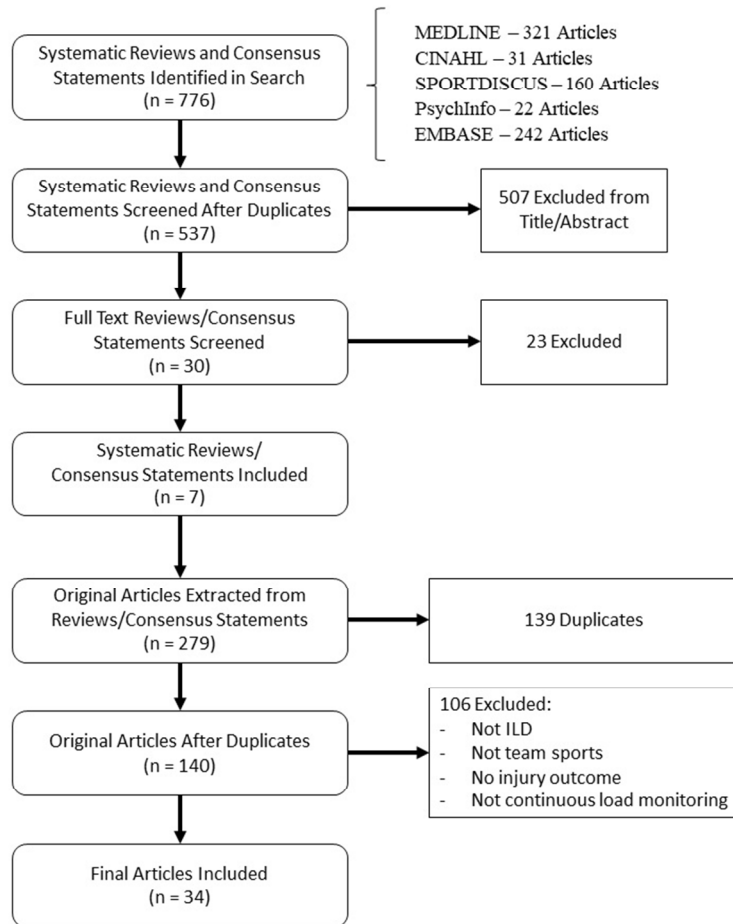

Figure A1 – Flow chart of included articles

80x96mm (300 x 300 DPI)

## APPENDIX 1 – Systematic Search Strategy and Article Selection

**Table A1 – Example search categories and terms:**

| Category                | Search Terms                                                                                                                                                                                                                                    |
|-------------------------|-------------------------------------------------------------------------------------------------------------------------------------------------------------------------------------------------------------------------------------------------|
| <b>Population</b>       | Athlet*, sport*                                                                                                                                                                                                                                 |
| <b>Method</b>           | Systematic review, Consensus statement                                                                                                                                                                                                          |
| <b>Outcome (Injury)</b> | Injur*, illness*, strain, sprain, incidence, overuse, overreach*, accidents, stress, wellness, recover*                                                                                                                                         |
| <b>Workload</b>         | Training, resistance training, external load, internal load, workload, acute:chronic workload ratio, congested calendar, physical exertion, session RPE, global position systems, accelerometry, intensity, duration, physical fitness, fatigue |

--- INSERT FIGURE A1 HERE ---

Figure A1 – Flow chart of included articles

**APPENDIX 2 – TABLE A2: Expanded Table of 3-Fold Alignment (With Descriptions)**

|                                                                                                                                                                                               |    | Themes of theoretical model                                   |                                                                                                                                                                                          |                                             | Themes of temporal design: intensive longitudinal data                                                                                             |                                                                                                                                     |                                                                                                        |                                                                                        | Statistical summary and typical uses                                                                                                                                                                                                              |
|-----------------------------------------------------------------------------------------------------------------------------------------------------------------------------------------------|----|---------------------------------------------------------------|------------------------------------------------------------------------------------------------------------------------------------------------------------------------------------------|---------------------------------------------|----------------------------------------------------------------------------------------------------------------------------------------------------|-------------------------------------------------------------------------------------------------------------------------------------|--------------------------------------------------------------------------------------------------------|----------------------------------------------------------------------------------------|---------------------------------------------------------------------------------------------------------------------------------------------------------------------------------------------------------------------------------------------------|
| Method                                                                                                                                                                                        | n  | Multifactorial aetiology                                      | Between and within-athlete differences                                                                                                                                                   | Complex system                              | Includes time-varying and time-invariant variables                                                                                                 | Missing/unbalanced data (due to rep. measures)                                                                                      | Repeated measure dependency                                                                            | Incorporates time in the analysis                                                      |                                                                                                                                                                                                                                                   |
| <b>Correlation (Pearson and Spearman)</b>                                                                                                                                                     | 10 | X                                                             | X                                                                                                                                                                                        | X                                           | X                                                                                                                                                  | X                                                                                                                                   | X                                                                                                      | X                                                                                      | 7 of the 10 articles correlated team loads with injury incidence (team-level). Of those at the individual level, 2 looked at # of pre-season sessions and % in-season completed, and 1 looked at training load and injury subscale on the REST-Q. |
| Anderson - 2003<br>Bresciani - 2010<br>Books - 2008<br>Gabbett - 2004<br>Gabbett Jenkins - 2011<br>Killen 2010<br>Mallo Dellal - 2012<br>Murray Gabbett - 2016<br>Owen - 2015<br>Windt – 2016 |    | Can only handle one x and one y variable.                     | Correlation could be at the team level (training load and # of injuries), or on individual level with quantitative outcome, but cannot differentiate within/between athlete differences. | No interactions between multiple predictors | No, assumes independent observations.                                                                                                              | Assumes one observation per research participant/study unit, so participants couldn't have different numbers of observations.       | In this case the correlation assumes independent observations so dependency is not taken into account. | Could, through having time as one of the variables, but cannot account for temporality |                                                                                                                                                                                                                                                   |
| <b>Unpaired t-test</b>                                                                                                                                                                        | 6  | X                                                             | X                                                                                                                                                                                        | X                                           | X                                                                                                                                                  | X                                                                                                                                   | X                                                                                                      | X                                                                                      |                                                                                                                                                                                                                                                   |
| Dennis et al., 2003<br>Dennis et al., 2005<br>Duhig et al - 2016<br>Owen et al., 2015<br>Saw et al., 2011<br>Visnes Bahr., 2013                                                               |    | Can only handle one x (grouping) and one y (outcome) variable | Only between-athlete differences (injured vs. uninjured)                                                                                                                                 | No interactions between multiple predictors | Independent samples t-test compare group means on either a time-varying (e.g average workload) or time-invariant variable (e.g. height), not both. | No, assumes one observation per research participant/study unit, so by design forces a balanced set (1 observation per participant) | By definition, assumes independence                                                                    | None included time in the analysis.                                                    | Generally, compared injured and uninjured players across a season. A group comparison of loading across the year fails to account for between/within athlete considerations and doesn't specify temporality.                                      |

|                                                                                                                          |   | Themes of theoretical model                                                                                                                                                                                        |                                                                            |                                             | Themes of temporal design: intensive longitudinal data |                                                            |                                                  |                                                                                   | Statistical summary and typical uses                                                                                                |
|--------------------------------------------------------------------------------------------------------------------------|---|--------------------------------------------------------------------------------------------------------------------------------------------------------------------------------------------------------------------|----------------------------------------------------------------------------|---------------------------------------------|--------------------------------------------------------|------------------------------------------------------------|--------------------------------------------------|-----------------------------------------------------------------------------------|-------------------------------------------------------------------------------------------------------------------------------------|
| Method                                                                                                                   | n | Multifactorial aetiology                                                                                                                                                                                           | Between and within-athlete differences                                     | Complex system                              | Includes time-varying and time-invariant variables     | Missing/unbalanced data (due to rep. measures)             | Repeated measure dependency                      | Incorporates time in the analysis                                                 |                                                                                                                                     |
| Chi-Square Tests                                                                                                         | 1 | X                                                                                                                                                                                                                  | X                                                                          | X                                           | X                                                      | X                                                          | X                                                | X                                                                                 |                                                                                                                                     |
| Murray - 2016 - IJSPP                                                                                                    |   | Only examines load groups and injury incidence                                                                                                                                                                     | Examines differences in injury incidence across different load groups only | No interactions between multiple predictors | Included load groups and injury incidence only         | Forces 1 observation (aggregated variable) per participant | Designed for independent observations and groups | Only included load groups and injury incidence                                    |                                                                                                                                     |
| Relative Risk Calculations                                                                                               | 8 | O                                                                                                                                                                                                                  | X                                                                          | X                                           | X                                                      | X                                                          | X                                                | X                                                                                 |                                                                                                                                     |
| Bowen - 2016<br>Dennis - 2003<br>Dennis - 2005<br>Hulin - 2014<br>Hulin - 2016<br>Hulin - 2016<br>Murray - 2016 - Scand. |   | In some cases, authors examined relative risks of loading groups after subdividing across another variable, like chronic workload, making it multifactorial. Other authors only examined risks across load groups. | No differentiation, and independence assumed                               | No interactions between multiple predictors | Only loading (time-varying variables included)         | Assumes independence of observations                       | Assumes independence                             | Uses weeks as unit of analysis but no incorporation of time into the calculations | Many of these RR approaches seem to use RRs that traditionally require independence, but do not account for this in their analysis. |

|                                                                                                                                                                                                                                                                                                                                                                                                                                                                                              |    | Themes of theoretical model                                                                 |                                                                               |                                               | Themes of temporal design: intensive longitudinal data                                                                                                                                |                                                          |                                                                                                                                           |                                                                | Statistical summary and typical uses |
|----------------------------------------------------------------------------------------------------------------------------------------------------------------------------------------------------------------------------------------------------------------------------------------------------------------------------------------------------------------------------------------------------------------------------------------------------------------------------------------------|----|---------------------------------------------------------------------------------------------|-------------------------------------------------------------------------------|-----------------------------------------------|---------------------------------------------------------------------------------------------------------------------------------------------------------------------------------------|----------------------------------------------------------|-------------------------------------------------------------------------------------------------------------------------------------------|----------------------------------------------------------------|--------------------------------------|
| Method                                                                                                                                                                                                                                                                                                                                                                                                                                                                                       | n  | Multifactorial aetiology                                                                    | Between and within-athlete differences                                        | Complex system                                | Includes time-varying and time-invariant variables                                                                                                                                    | Missing/unbalanced data (due to repeated measures)       | Repeated measure dependency                                                                                                               | Incorporates time in the analysis                              |                                      |
| <b>Regression (logistic, linear, multinomial)</b>                                                                                                                                                                                                                                                                                                                                                                                                                                            | 13 | O                                                                                           | X                                                                             | X                                             | X                                                                                                                                                                                     | X                                                        | X                                                                                                                                         | X                                                              |                                      |
| Arnason 2004 - Regular logistic<br>Bowen - 2016 - Regular logistic<br>Brink - 2010 - Regular multinomial<br>Colby - 2014 - Regular logistic<br>Duhig - 2016 - Regular logistic<br>Gabbett Domrow - 2007 - Regular linear<br>Hulin - 2014 - Regular logistic<br>Hulin - 2016 - Regular logistic<br>Hulin - 2016 - Regular logistic<br>Murray - 2016 - Regular logistic (Scand)<br>Owen - 2015 - Regular linear<br>Rogalski - 2013 - Regular logistic<br>Visnes Bahr - 2013 - Regular logistic |    | Some authors include multiple variables, others only single load measurements independently | Assume independent observations, so cannot examine within-athlete differences | None included interactions between predictors | Assumes 1 observation per unit<br><br>Becomes time invariant on aggregation<br><br>In this case, some authors have included both, but in doing so violate the independence assumption | No, assumes one observation per athlete or research unit | Assumes independence.<br><br>Visnes & Bahr (2013) do take it into account through logistic regression, but do not have the benefit of ILD | Assumes 1 observation per unit                                 |                                      |
| <b>Paired t-test</b>                                                                                                                                                                                                                                                                                                                                                                                                                                                                         | 2  | X                                                                                           | X                                                                             | X                                             | X                                                                                                                                                                                     | X                                                        | √                                                                                                                                         | √                                                              |                                      |
| Saw et al., 2011<br>Dennis et al., 2003                                                                                                                                                                                                                                                                                                                                                                                                                                                      |    | No, only one variable (before/after) and outcome (load)                                     | Only examines within-athlete differences                                      | No interactions between multiple predictors   | No - only time-varying variables                                                                                                                                                      | All subjects must have 2 'observations'                  | By definition, accounts for repeated measures through paired sample                                                                       | Time is incorporated as pre-injury and 'injury' blocks of time |                                      |

|                                                                                         |   | Themes of theoretical model                                                                                                                 |                                                                                                                            |                                             | Themes of temporal design: intensive longitudinal data  |                                                |                                                                         |                                                           | Statistical summary and typical uses                                                                                                                                                                                                                                                                                                                     |
|-----------------------------------------------------------------------------------------|---|---------------------------------------------------------------------------------------------------------------------------------------------|----------------------------------------------------------------------------------------------------------------------------|---------------------------------------------|---------------------------------------------------------|------------------------------------------------|-------------------------------------------------------------------------|-----------------------------------------------------------|----------------------------------------------------------------------------------------------------------------------------------------------------------------------------------------------------------------------------------------------------------------------------------------------------------------------------------------------------------|
| Method                                                                                  | n | Multifactorial aetiology                                                                                                                    | Between and within-athlete differences                                                                                     | Complex system                              | Includes time-varying and time-invariant variables      | Missing/unbalanced data (due to rep. measures) | Repeated measure dependency                                             | Incorporates time in the analysis                         |                                                                                                                                                                                                                                                                                                                                                          |
| <b>Repeated measures ANOVA (One- or two-way ANOVA allowing for between- and within)</b> | 5 | O                                                                                                                                           | O                                                                                                                          | X                                           | O                                                       | X                                              | √                                                                       | √                                                         | Killen used 1-way ANOVA to compare the load in early pre-season compared to late pre-season, and used chi-square analyses to compare injury rate in the early and late pre-season. Uses the two separate analyses to tentatively link load leads to injury. Gabbett, 2004 performed a 2-way ANOVA comparing loads (season X month), so time is included. |
| Ehrman - 2016<br>Gabbett - 2004<br>Malisoux - 2013<br>Murray - 2016<br>Killen - 2011    |   | Murray (2016) compared part of season by training load group, Malisoux (2013) and Ehrmann (2016) only compared injury and pre-injury blocks | In some cases (Murray, 2016), a two-way repeated measures ANOVA can examine between and within athlete differences in risk | No interactions between multiple predictors | Murray (2013) compared load group by season period      | Assume sphericity                              | Yes, by definition                                                      | Yes, as season period, or as pre-injury and injury period |                                                                                                                                                                                                                                                                                                                                                          |
| <b>Cox proportional hazards model</b>                                                   | 1 | √                                                                                                                                           | X                                                                                                                          | X                                           | X                                                       | √                                              | √                                                                       | √                                                         |                                                                                                                                                                                                                                                                                                                                                          |
| Malisoux - 2013                                                                         |   | Included volume and intensity of training along with age and sex                                                                            | Cox PH conducted at the team/school level examined between-athlete differences                                             | No interactions between factors             | Only included average weekly load and average intensity | Can handle unbalanced data                     | By using time-to-event as the outcome, Cox-PH robust to this dependency | Uses time to event in analysis                            |                                                                                                                                                                                                                                                                                                                                                          |



|                                                                                                                 |   | Themes of theoretical model                                                                                                                       |                                                                                      |                                         | Themes of temporal design: intensive longitudinal data               |                                                         |                                                               |                                                                                                                    | Statistical summary and typical uses                                                                                                                                       |
|-----------------------------------------------------------------------------------------------------------------|---|---------------------------------------------------------------------------------------------------------------------------------------------------|--------------------------------------------------------------------------------------|-----------------------------------------|----------------------------------------------------------------------|---------------------------------------------------------|---------------------------------------------------------------|--------------------------------------------------------------------------------------------------------------------|----------------------------------------------------------------------------------------------------------------------------------------------------------------------------|
| Method                                                                                                          | n | Multifactorial aetiology                                                                                                                          | Between and within-athlete differences                                               | Complex system                          | Includes time-varying and time-invariant variables                   | Missing/unbalanced data (due to rep. measures)          | Repeated measure dependency                                   | Incorporates time in the analysis                                                                                  |                                                                                                                                                                            |
| <b>Generalised estimating equations (modeled through logistic and poisson regression)</b>                       | 6 | O                                                                                                                                                 | X                                                                                    | X                                       | O                                                                    | √                                                       | √                                                             | O                                                                                                                  | Most GEE approaches accounted for repeated measures, but Clausen et al (2014) used them to cluster players within teams), averaging exposure throughout the entire season. |
| Clausen - 2014<br>Cross - 2016<br>Dennis - 2004<br>Gabbett - 2010<br>Gabbett Domrow - 2007<br>Veugeleers - 2016 |   | Most authors used multiple variables with GEEs, although some only used GEE to account for repeated measures (Dennis, 2004, Gabbett Domrow, 2007) | Provides an 'average' effect for all athletes, but controls for the clustering       | No complex interactions between factors | Some authors only predicted injury (y/n) based on workload variables | GEEs handle unbalanced data well                        | GEE accounts for clustering                                   | Do not incorporate time explicitly into the modelling process, and none of the authors included time in the model. |                                                                                                                                                                            |
| <b>Multilevel Modeling</b>                                                                                      | 1 | √                                                                                                                                                 | √                                                                                    | X                                       | √                                                                    | √                                                       | √                                                             | X                                                                                                                  |                                                                                                                                                                            |
| Windt et al - 2016                                                                                              |   | Multiple physical outputs included and pre-season training                                                                                        | Within-athlete risks determined from level 1 variables, between-athlete from level 2 | No complex interactions between factors | Pre-season and player variables along with training variables        | Multilevel models are robust to missing/unbalanced data | Via random effects for each player                            | Analysed weekly risk and subsequent week risk; did not directly incorporate time                                   |                                                                                                                                                                            |
| <b>Frailty model</b>                                                                                            | 1 | √                                                                                                                                                 | √                                                                                    | X                                       | √                                                                    | √                                                       | √                                                             | √                                                                                                                  | Included a many physical output metrics that were dichotomised into high/low categories and calculated RRs. Multicollinearity was not considered                           |
| Gabbett Ullah - 2012                                                                                            |   | Yes, previous injury and physical outputs                                                                                                         | Unclear (I think yes due to the frailty term)                                        | No complex interactions between factors | Yes (injury history)                                                 | Yes (robust to unbalanced data)                         | Yes (frailty model allows for dependency of recurrent events) | Yes, since this is a time-to-event analysis.                                                                       |                                                                                                                                                                            |

1  
2  
3  
4  
5  
6  
7  
8  
9  
10  
11  
12  
13  
14  
15  
16  
17  
18  
19  
20  
21  
22  
23  
24  
25  
26  
27  
28  
29  
30  
31  
32  
33  
34  
35  
36  
37  
38  
39  
40  
41  
42  
43  
44  
45  
46  
47  
48  
49  
50  
51  
52  
53  
54  
55  
56  
57  
58  
59  
60

For peer review only

# BMJ Open

## Getting the most out of intensive longitudinal data: A methodological review of workload—injury studies

|                                    |                                                                                                                                                                                                                                                                                                                                                                                                                                                                                                                                                                                           |
|------------------------------------|-------------------------------------------------------------------------------------------------------------------------------------------------------------------------------------------------------------------------------------------------------------------------------------------------------------------------------------------------------------------------------------------------------------------------------------------------------------------------------------------------------------------------------------------------------------------------------------------|
| Journal:                           | <i>BMJ Open</i>                                                                                                                                                                                                                                                                                                                                                                                                                                                                                                                                                                           |
| Manuscript ID                      | bmjopen-2018-022626.R1                                                                                                                                                                                                                                                                                                                                                                                                                                                                                                                                                                    |
| Article Type:                      | Research                                                                                                                                                                                                                                                                                                                                                                                                                                                                                                                                                                                  |
| Date Submitted by the Author:      | 24-Jul-2018                                                                                                                                                                                                                                                                                                                                                                                                                                                                                                                                                                               |
| Complete List of Authors:          | Windt, Johann; University of British Columbia, Experimental Medicine<br>Ardern, CL; Linköping University, Division of Physiotherapy<br>Gabbett, Tim; Gabbett Performance Solutions; University of Southern<br>Queensland, Institute for Resilient Regions<br>Khan, Karim; The University of British Columbia, Centre for Hip Health &<br>Mobility<br>Cook, Chad; Duke University, Department of Orthopedics<br>Sporer, Ben; University of British Columbia, Family Practice<br>Zumbo, Bruno; University of British Columbia, Measurement, Evaluation,<br>and Research Methodology Program |
| <b>Primary Subject<br>Heading</b>: | Sports and exercise medicine                                                                                                                                                                                                                                                                                                                                                                                                                                                                                                                                                              |
| Secondary Subject Heading:         | Research methods                                                                                                                                                                                                                                                                                                                                                                                                                                                                                                                                                                          |
| Keywords:                          | STATISTICS & RESEARCH METHODS, PREVENTIVE MEDICINE, SPORTS<br>MEDICINE                                                                                                                                                                                                                                                                                                                                                                                                                                                                                                                    |
|                                    |                                                                                                                                                                                                                                                                                                                                                                                                                                                                                                                                                                                           |

SCHOLARONE™  
Manuscripts

Running Title: ALIGNING THEORY, DATA COLLECTION, AND STATISTICAL ANALYSES IN SPORTS  
MEDICINE RESEARCH USING LONGITUDINAL DATA

**Getting the most out of intensive longitudinal data: A methodological review of workload—injury studies**

Johann Windt,<sup>1,2,3</sup> Clare L Ardern,<sup>4,5</sup> Tim J. Gabbett,<sup>6,7</sup> Karim M. Khan,<sup>1,8</sup> Chad E. Cook,<sup>9</sup>

Ben Sporer,<sup>8,10</sup> Bruno D. Zumbo<sup>11</sup>

<sup>1</sup> *Experimental Medicine Program, University of British Columbia, Vancouver, Canada*

<sup>2</sup> *United States Olympic Committee, Colorado Springs, United States of America*

<sup>3</sup> *United States Coalition for the Prevention of Illness and Injury in Sport, Colorado Springs, United States of America*

<sup>4</sup> *Division of Physiotherapy, Linköping University, Linköping, Sweden*

<sup>5</sup> *School of Allied Health, La Trobe University, Melbourne, Australia*

<sup>6</sup> *Gabbett Performance Solutions, Brisbane, Australia*

<sup>7</sup> *University of Southern Queensland, Institute for Resilient Regions, Ipswich, Australia*

<sup>8</sup> *Department of Family Practice, University of British Columbia*

<sup>9</sup> *Department of Orthopaedics, Duke University, Durham, United States of America* <sup>10</sup> *Vancouver Whitecaps Football Club, Vancouver, British Columbia*

<sup>11</sup> *Measurement, Evaluation, and Research Methodology Program, University of British Columbia, Vancouver, Canada*

Corresponding Author:

Johann Windt, MSc, CSCS (ORCID ID: 0000-0001-5517-2609)

1 Olympic Plaza, Colorado Springs, CO 80909

Email: johannwindt@gmail.com

Key Words: Methodology, workloads, training load, athletic injury, statistics

Word Count: 8323

1  
2  
3 **Objectives:** To systematically identify and qualitatively review the statistical approaches used in prospective  
4 cohort studies of team sports that reported ILD (>20 observations per athlete) and examined the relationship  
5 between athletic workloads and injuries. Since longitudinal research can be improved by aligning the (1)  
6 theoretical model, (2) temporal design, and (3) statistical approach, we reviewed the statistical approaches used in  
7 these studies to evaluate how closely they aligned these three components.  
8  
9  
10  
11  
12

13  
14 **Design:** Methodological review.  
15

16  
17 **Methods:** After finding 6 systematic reviews and 1 consensus statement in our systematic search, we extracted 34  
18 original prospective cohort studies of team sports that reported ILD (>20 observations per athlete) and examined  
19 the relationship between athletic workloads and injuries. Using Prof. Linda Collins' three-part framework of  
20 aligning the theoretical model, temporal design, and statistical approach, we qualitatively assessed how well the  
21 statistical approaches aligned with the intensive longitudinal nature of the data, and with the underlying  
22 theoretical model. Finally, we discussed the implications of each statistical approach and provide  
23 recommendations for future research.  
24  
25  
26  
27  
28  
29  
30  
31

32 **Results:** Statistical methods such as correlations, t-tests, and simple linear/logistic regression were commonly  
33 used. However, these methods did not adequately address the (1) themes of theoretical models underlying  
34 workloads and injury, nor the (2) temporal design challenges (ILD). Although time-to-event analyses (e.g. Cox  
35 Proportional Hazards and frailty models) and multilevel modelling are better-suited for ILD, these were utilized in  
36 fewer than a 10% of the studies (n=3).  
37  
38  
39  
40  
41  
42  
43

44 **Conclusions:** Rapidly accelerating availability of intensive longitudinal data is the norm in many fields of health  
45 care delivery and thus health research. These data present an opportunity to better address research questions,  
46 especially when appropriate statistical analyses are chosen.  
47  
48  
49  
50  
51  
52  
53  
54  
55  
56  
57  
58  
59  
60

### STRENGTHS AND LIMITATIONS

- As intensive longitudinal data become increasingly common across disciplines, catalysed by technological advances, this methodological review provides researchers with several considerations when determining how to analyse these data.
- Whereas systematic reviews provide a quantitative synthesis of research findings, they do not account for the statistical approaches used in the original studies. Therefore, methodological reviews like this one fill an important void in the literature to highlight key shortcomings and ways forward from a methodological and statistical perspective.
- By choosing a homogenous group of papers – prospective cohort studies in team sports that collected intensive longitudinal data – we were able to focus more directly on the statistical analyses that authors employed.
- It was beyond the scope of this review to list every challenge posed by intensive longitudinal data, and we are not exhaustive in our discussion of different analyses and their capacity to handle the challenges that we did highlight.

## INTRODUCTION

Intensive longitudinal data (ILD) are being collected more frequently in various research areas [1], catalysed by technological advancements that simplify data collection and analysis [2]. By collecting data repeatedly on the same participants, researchers are enabled to answer more detailed research questions, particularly regarding phenomena that change or fluctuate over time. However, arriving at these answers requires researchers to overcome the challenges of analysing ILD, which include: (1) the dependencies created by repeated measures, (2) missing/unbalanced data, (3) separating between- and within-person effects, (4) time-varying and time-invariant (stable) factors, and (5) specifying the role of time/temporality [3].

The field of exercise and sports medicine provides one specific example which can illustrate principles that apply to the use of intensive longitudinal data broadly. In the field of sports performance, technological advances mean that a plethora of physiological, psychological and physical data are conveniently available from athletes [4,5]. As one example, of 48 professional football clubs that responded to a survey on player monitoring, 100% reported collecting daily global positioning system (GPS) and heart rate (HR) data [6].

One research question that has gained a great deal of interest in the last decade is how athletes' training and competition workloads relate to injury risk. Since athletes' training and injury risk continually varies over time, many researchers have used prospective cohort studies to collect and analyse ILD to answer this question [7].

There is moderate evidence from systematic reviews and an International Olympic Committee (IOC) consensus statement suggesting a positive relationship between injury rates and high training workloads, increased risk of injury with low workloads, and a pronounced increase in injury risk associated with rapid workload increases [7–11]. However, such systematic reviews do not consider the statistical approaches used in included studies [12].

Choosing the wrong statistical analysis or poorly implementing an otherwise correct one (e.g. violating statistical assumptions) can bias results and create false conclusions. Even a perfectly performed systematic review cannot compensate for poorly designed, or poorly analysed studies [13].

1  
2  
3 Longitudinal data analysis is most effective when the chosen statistical approach aligns with the frequency of data  
4 collection and with the theoretical model underpinning the research question (See Box 1) [14]. Therefore, we used  
5 this lens to evaluate whether the statistical models employed in prospective cohort studies using ILD to  
6 investigate the relation between athletic workloads and injury were optimal. We had 3 aims: (1) to summarise  
7 researchers' data collection, methodological, statistical, and reporting practices [12,15]; (2) to evaluate the degree  
8 to which the adopted statistical analyses fit within Collins' three-fold alignment [see Box 1]; and (3) to provide  
9 recommendations for future investigations in the field.  
10  
11  
12  
13  
14  
15  
16  
17  
18

19 *Box 1: Theoretical model – temporal design – statistical model.*

20  
21  
22 *In a landmark, highly-cited paper, Professor Linda Collins described how aligning the (1) theoretical model*  
23 *(subject matter theory), (2) temporal design (data collection strategy/timing), and (3) statistical model (analytical*  
24 *strategy) is crucial when analysing longitudinal data [14]. For example, if researchers (1) theorize that a given*  
25 *physiological variable fluctuates every hour, (2) data must be collected at least on an hourly basis. If researchers*  
26 *measure participants once a day, they will miss virtually all the hourly fluctuations that their theories predict.*  
27 *Once researchers have collected their hourly data, they should (3) select a statistical strategy that enables them*  
28 *to examine the relationship between these fluctuations and the outcome of interest. As Collins noted, perfect*  
29 *alignment of these 3 components may not be possible, but it provides researchers a target, and readers a lens*  
30 *through which longitudinal research can be evaluated.*  
31  
32  
33  
34  
35  
36  
37  
38  
39  
40  
41  
42  
43

## 44 **METHODS**

### 45 **Article selection**

46 We systematically searched the literature (MEDLINE, CINAHL, SPORTDISCUS, PsychInfo, and EMBASE)  
47 (December 10, 2016) to identify systematic reviews and consensus statements that investigated the relationship  
48 between workloads and athletic injuries, with the aim of extracting all original articles included in these reviews  
49 that met our inclusion criteria. A summary of the systematic search and article selection process is described in  
50 Appendix 1 (Table A1 and Figure A1), and the full systematic search is available from the authors.  
51  
52  
53  
54  
55  
56  
57  
58  
59  
60



1  
2  
3 A priori, we operationally defined ‘workload’ as either external – the amount of work completed by the athlete  
4 (e.g. distance run, hours completed, etc.), or internal – the athlete’s response to a given external workload (e.g.  
5 session rating of perceived exertion, heart-rate based measures, etc.). We acknowledge that athlete self-reported  
6 measures often evaluate how athletes are handling training demands and may be referred to as ‘internal’ load  
7 measures, but we considered these perceptual wellbeing measures as a distinct step from quantifying athletes’  
8 internal or external workloads [16]. Athletic injuries have been diversely defined in the literature, so we  
9 operationally defined athletic injury as any article that reported measuring ‘injury’, regardless of their specific  
10 definition (e.g. time loss, medical attention, etc).

11  
12  
13  
14  
15  
16  
17  
18  
19  
20  
21 Two authors (JW + TG) screened the titles/abstracts of the systematic reviews. Where necessary, the full texts  
22 were retrieved to determine whether they should be included. A total of 6 systematic reviews [7–10,17,18] and 1  
23 consensus statement [11] were identified that included at least 1 article meeting the inclusion criteria.

24  
25  
26  
27  
28 We extracted and reviewed the full texts of all the original studies included (n=279) in these 7 papers. For our  
29 analysis, we included all the original articles that met the following criteria:

- 30  
31  
32  
33  
34  
35  
36  
37  
38  
39  
40  
41  
42  
43  
44  
45  
46  
47  
48  
49  
50  
51  
52  
53  
54  
55  
56  
57  
58  
59  
60
- 1) Original articles were prospective cohort studies that examined the relationship between at least 1 measure of internal or external workload (as defined above) and athletic injury. Since theoretical models describe the recursive nature of injury risk with each training or competition exposure, workloads had to be continually monitored and include both training and match workloads for the same athletes. Although some athletes may have entered or left the group during the study period (e.g. through retirement or trades to other teams) the same team/group of athletes had to be followed throughout the study period, as opposed to repeated cross-sectional snapshots of different cohorts.
  - 2) Articles collected intensive longitudinal data. We defined intensive longitudinal data as >20 observations per athlete [14].
  - 3) Articles studied team sport athletes. We chose team sports because (1) there are high amounts of ILD collected in applied team sport settings [6], and (2) the majority of workload—injury studies are in team

1  
2  
3 sport athletes (Jones, 2016). Military populations and individual sports (e.g. distance running) were  
4  
5 excluded due to the differences in task requirements and operating environment.  
6  
7

### 8 **Patient and public involvement**

9 As a methodological review, there was no patient or public involvement in this current investigation.  
10

### 11 **Article coding and description**

12 To describe the methodological, statistical, and reporting approaches utilized in each article, two authors (JW +  
13 CA) reviewed all the included papers and extracted 50 items of information for each article. These items included  
14  
15 publication year, journal, variable operationalization (e.g. internal vs. external load measures, injury definition,  
16  
17 etc), methodological approaches, statistical analyses implemented, reported findings, and more. To ensure  
18  
19 consistency between coders, 10 articles were randomly selected, coded independently by both reviewers, and  
20  
21 compared to assess agreement. Discrepancies were discussed by the two coders and an additional 5 articles were  
22  
23 randomly selected and coded independently. The remaining articles were coded by JW and checked by CA.  
24  
25  
26  
27

### 28 **Assessing how statistical models aligned with Collins' threefold framework**

29 To evaluate the statistical approaches used in this field, we first identified the key themes and challenges within  
30  
31 the theoretical models and temporal design features within the workload—injury field, then developed a  
32  
33 qualitative assessment to evaluate the statistical approaches.  
34  
35  
36  
37

38 Collins Component 1: The theoretical models that underpin athletic workloads and injury risk (in brief)

39  
40 Briefly, we identified at least 3 key elements of athletic injury aetiology models. First, *sports injuries are*  
41  
42 *multifactorial* [19–21]. Aetiology models since 1994 have all explained between-athlete differences in injury risk  
43  
44 by identifying a host of 'internal' (e.g. athlete characteristics, psychological wellbeing, previous injury) and  
45  
46 'external' (e.g. opponent behaviour, playing surface) risk factors. More recently, Meeuwisse et al.'s dynamic  
47  
48 recursive model [22] and the workload—injury aetiology model [23], have highlighted the recurrent nature of  
49  
50 injury risk, meaning each athlete's injury risk (i.e. within-athlete risk) also fluctuates continually as they train or  
51  
52 compete in their sport (Figure 1). Thus, a second theme is that *injury risk differs between- and within-athletes*.  
53  
54

55 Finally, more recent injury aetiology models have highlighted *injury risk as a complex, dynamic system* (Figure 2)  
56  
57  
58  
59  
60

1  
2  
3 [24,25]. Complex systems, as in weather forecasting or biological systems [26,27], possess many key features,  
4 including an open-system, inherent non-linearity between variables and outcomes, recursive loops where the  
5 system output becomes the new system input, self-organization where regular patterns (risk profiles) may emerge  
6 for given outcomes (emergent pattern), and uncertainty [24].  
7  
8  
9

10  
11 --- INSERT FIGURE 1 HERE ---  
12

13 **Figure 1** – The workload—injury aetiology model. Key features include the multifactorial nature of injury,  
14 between- and within- athlete differences in risk, and a recursive loop.  
15  
16

17  
18  
19 --- INSERT FIGURE 2 HERE ---  
20

21 **Figure 2** – Complex systems model of athletic injury. Web of determinants are shown for an ACL injury in  
22 basketball players (A), and in a ballet dancer (B)  
23  
24

25 Collins' 2<sup>nd</sup> Component – Temporal design / data collection  
26

27  
28 The theoretical models relating workloads and injury illustrate a continuously fluctuating injury risk, with many  
29 variables that influence risk on a daily or weekly basis [22–24]. Thus, if researchers want to investigate the  
30 association between workloads and injuries, these data must be collected frequently enough to observe changes in  
31 these variables as they occur (temporal design). With technological advances, athletes' physiological,  
32 psychological and physical variables are now often collected on a daily, weekly or monthly basis, along with  
33 ongoing injury surveillance data [4,5]. Therefore, in the workload—injury field, the theoretical models (injury  
34 aetiology models that describe regular fluctuation in workloads and injury risk) and the temporal design (frequent,  
35 often daily, data collection) are often well-aligned, especially in prospective cohort studies using ILD. This leaves  
36 us to consider only whether Professor Collins' third component – the statistical model – aligns with these first  
37 two.  
38  
39  
40  
41  
42  
43  
44  
45  
46  
47  
48  
49  
50  
51  
52  
53  
54  
55  
56  
57  
58  
59  
60

### Collins' Component 3 – Statistical model

From the theoretical aetiology models underpinning the workload—injury association, we highlighted three key themes to consider when choosing a statistical model: (1) injury risk is multifactorial, (2) between-athlete and within-athlete differences in injury risk fluctuate regularly, and (3) injury risk may be considered a complex, dynamic system.

From a temporal design perspective, intensive longitudinal data (ILD) are necessary to address these key themes, but they also carry at least 5 challenges that influence the choice of the statistical model.

- 1) Differentiating between- and within-person effects.
- 2) ILD include time-varying variables (e.g. workloads) and may also incorporate stable (time-invariant) variables (e.g., sex).
- 3) The 'dependency' created by repeated measurements of the same individuals violates the assumption of 'independence' common to many traditional analyses [28,29].
- 4) Almost all longitudinal datasets have missing or unbalanced data [14].
- 5) Longitudinal data analysis require researchers to consider the role of time in their analysis [3].

### Evaluating statistical approaches

We deliberately tried to align components 1 and 2 of Collins' framework by describing the theoretical models underpinning the workload—injury association and only including articles that had a temporal design characterised by ILD. To review whether statistical approaches aligned with these two components, two authors (JW + BZ) qualitatively assessed whether the statistical models, as employed in the included studies, (1) were multifactorial, (2) differentiated between- and within-athlete differences in injury risk, and (3) analyzed the data as a dynamic system – the three themes highlighted in the theoretical framework. From the temporal design, the same two authors evaluated whether the statistical analyses (4) included both time-varying and time-invariant

1  
2  
3 variables, (5) were robust to missing/unbalanced data, 6) addressed the dependencies created by repeated  
4  
5 measures, and (7) incorporated time into the analysis.  
6  
7

### 8 **Data synthesis approach**

9 We first describe the characteristics of the included articles, then present our qualitative assessment of how well  
10  
11 the various statistical approaches fit within Collins' framework.  
12  
13

## 14 **RESULTS**

15  
16 Thirty-four articles were included in this methodological review (Appendix 1). In the first 10 articles coded by  
17  
18 both reviewers, there were 10 discrepancies out of 500 total coded entries (10 papers x 50 items/paper), which  
19  
20 gave us 98% agreement between reviewers. No item had more than 2 discrepancies. Of the 250 study criteria in  
21  
22 the second set of 5 articles coded by both reviewers, there were 8 discrepancies (97% agreement).  
23  
24

25  
26 Included articles were published from 2003 – 2016, with 78% of the studies published since 2010. Sports studied  
27  
28 included rugby league (n = 10), soccer (n = 7), Australian football (n = 6), cricket (n = 5), rugby union (n = 2),  
29  
30 multiple sports (n = 1), and basketball, handball, and volleyball (n = 1 each). Studies included an average of 96  
31  
32 athletes (median = 46), ranging from 12 [30] to 502 athletes [31]. The observation period for these cohort studies  
33  
34 ranged from 14 weeks [32] to 6 years [33]. Most studies investigated male athletes (n = 30), with 2 studies on  
35  
36 female athletes, and 2 on both sexes. Table 1 summarizes the included articles' basic characteristics, while the full  
37  
38 data extraction table is available from the authors upon request.  
39  
40

### 41 **Data collection**

#### 42 **Injury definitions**

43  
44  
45  
46 Injury definitions varied across articles, with exact wording outlined in the Online Supplementary Appendix. In  
47  
48 Table 2, we have categorised the definitions into more discrete injury categories (and subcategories) in  
49  
50 accordance with recognized consensus statements [34]. Where studies used multiple injury definitions, we  
51  
52 categorized them according to the definition used for the primary analysis.  
53  
54  
55  
56  
57  
58  
59  
60

| Reference | Journal | Sport | Study Length | Level | Sex | Age |
|-----------|---------|-------|--------------|-------|-----|-----|
| 2         |         |       |              |       |     |     |
| 3         |         |       |              |       |     |     |
| 4         |         |       |              |       |     |     |
| 5         |         |       |              |       |     |     |
| 6         |         |       |              |       |     |     |
| 7         |         |       |              |       |     |     |
| 8         |         |       |              |       |     |     |
| 9         |         |       |              |       |     |     |
| 10        |         |       |              |       |     |     |
| 11        |         |       |              |       |     |     |
| 12        |         |       |              |       |     |     |
| 13        |         |       |              |       |     |     |
| 14        |         |       |              |       |     |     |
| 15        |         |       |              |       |     |     |
| 16        |         |       |              |       |     |     |
| 17        |         |       |              |       |     |     |
| 18        |         |       |              |       |     |     |
| 19        |         |       |              |       |     |     |
| 20        |         |       |              |       |     |     |
| 21        |         |       |              |       |     |     |
| 22        |         |       |              |       |     |     |
| 23        |         |       |              |       |     |     |
| 24        |         |       |              |       |     |     |
| 25        |         |       |              |       |     |     |
| 26        |         |       |              |       |     |     |
| 27        |         |       |              |       |     |     |
| 28        |         |       |              |       |     |     |
| 29        |         |       |              |       |     |     |
| 30        |         |       |              |       |     |     |
| 31        |         |       |              |       |     |     |
| 32        |         |       |              |       |     |     |
| 33        |         |       |              |       |     |     |
| 34        |         |       |              |       |     |     |
| 35        |         |       |              |       |     |     |
| 36        |         |       |              |       |     |     |
| 37        |         |       |              |       |     |     |
| 38        |         |       |              |       |     |     |
| 39        |         |       |              |       |     |     |
| 40        |         |       |              |       |     |     |
| 41        |         |       |              |       |     |     |

For peer review only

**Table 1:** Summary of included workload—injury investigations, sorted by sport then publication year

|    |                                |                                  |                                 |              |     |                                    |                  |
|----|--------------------------------|----------------------------------|---------------------------------|--------------|-----|------------------------------------|------------------|
| 1  | (Rogalski et al., 2013) [35]   | <i>J Sci Med Sport</i>           | 1 season                        | AFL          | 46  | Elite                              | Male             |
| 2  | (Colby et al., 2014) [36]      | <i>JSCR</i>                      | 1 Season                        | AFL          | 46  | Professional                       | Male             |
| 3  | (Duhig et al., 2016) [37]      | <i>BJSM</i>                      | 2 Seasons                       | AFL          | 51  | Professional                       | Male             |
| 4  | (Murray et al., 2016a) [38]    | <i>Scand J Med Sci Sports</i>    | 2 Seasons                       | AFL          | 59  | Professional                       | Male             |
| 5  | (Murray et al., 2016b) [39]    | <i>IJSP</i>                      | 1 season                        | AFL          | 46  | Professional                       | Male             |
| 6  | (Veugelers et al., 2015) [40]  | <i>J Sci Med Sport</i>           | 15 weeks                        | AFL          | 45  | Elite                              | Male             |
| 7  | (Anderson et al., 2003) [30]   | <i>JSCR</i>                      | 21 weeks                        | Basketball   | 12  | Sub-elite competitive              | Female           |
| 8  | (Dennis et al., 2003) [41]     | <i>J Sci Med Sport</i>           | 2 Seasons                       | Cricket      | 90  | Professional                       | Male             |
| 9  | (Dennis et al., 2004) [42]     | <i>J Sci Med Sport</i>           | 1 Season                        | Cricket      | 12  | Professional                       | Male             |
| 10 | (Dennis et al., 2005) [43]     | <i>BJSM</i>                      | 2002-2003 cricket season        | Cricket      | 44  | Sub-elite competitive              | Male             |
| 11 | (Saw et al., 2011) [44]        | <i>BJSM</i>                      | 1 season                        | Cricket      | 28  | Elite                              | Male             |
| 12 | (Hulin et al., 2014) [33]      | <i>BJSM</i>                      | 43 indiv. seasons / 6 years     | Cricket      | 28  | Professional                       | Male             |
| 13 | (Bresciani et al., 2010) [45]  | <i>Eur J Sport Sci</i>           | 1 season (40 weeks)             | Handball     | 14  | Elite                              | Male             |
| 14 | (Gabbett, 2004a) [46]          | <i>BJSM</i>                      | 3 years                         | Rugby league | 220 | Sub-elite                          | Male             |
| 15 | (Gabbett, 2004b) [47]          | <i>J Sports Sci</i>              | 1 season                        | Rugby league | 79  | Semi-professional                  | Male             |
| 16 | (Gabbett & Domrow, 2007) [48]  | <i>J Sports Sci</i>              | 2 seasons                       | Rugby league | 183 | "Sub-elite"                        | Male             |
| 17 | (Gabbett, 2010) [49]           | <i>JSCR</i>                      | 4 years                         | Rugby league | 91  | Professional                       | Male             |
| 18 | (Gabbett & Jenkins, 2011) [50] | <i>J Sci Med Sport</i>           | 4 years                         | Rugby league | 79  | Professional                       | Male             |
| 19 | (Gabbett & Ullah, 2012) [51]   | <i>JSCR</i>                      | 1 Season                        | Rugby league | 34  | Professional                       | Male             |
| 20 | (Hulin et al., 2015) [52]      | <i>BJSM</i>                      | 2 Seasons                       | Rugby league | 28  | Professional                       | Male             |
| 21 | (Hulin, et al., 2016) [53]     | <i>BJSM</i>                      | 2 Seasons                       | Rugby league | 53  | Professional                       | Male             |
| 22 | (Windt et al., 2016) [54]      | <i>BJSM</i>                      | 1 season                        | Rugby league | 30  | Elite                              | Male             |
| 23 | (Killen et al., 2010) [32]     | <i>JSCR</i>                      | 14 weeks                        | Rugby league | 36  | Professional                       | Male             |
| 24 | (Brooks et al., 2008) [31]     | <i>J Sports Sci</i>              | 2 seasons                       | Rugby Union  | 502 | Professional                       | Male             |
| 25 | (Cross et al., 2015) [55]      | <i>IJSP</i>                      | 1 Season                        | Rugby Union  | 173 | Professional                       | Male             |
| 26 | (Arnason et al., 2004) [56]    | <i>AJSM</i>                      | 1 season                        | Soccer       | 306 | Professional                       | Male             |
| 27 | (Brink et al., 2010) [57]      | <i>BJSM</i>                      | 2 Seasons                       | Soccer       | 53  | Elite Youth Players                | Male             |
| 28 | (Mallo & Dellal, 2012) [58]    | <i>J Sports Med Phys Fitness</i> | 2 seasons (2007/08 and 2008/09) | Soccer       | 35  | Professional (Spanish Division II) | Male             |
| 29 | (Clausen et al., 2014) [59]    | <i>AJSM</i>                      | 1 Season                        | Soccer       | 498 | Recreational                       | Female           |
| 30 | (Owen et al., 2015) [60]       | <i>JSCR</i>                      | 2 consecutive seasons           | Soccer       | 23  | Professional                       | Male             |
| 31 | (Bowen et al., 2016) [61]      | <i>BJSM</i>                      | 2 Seasons                       | Soccer       | 32  | Elite Youth Players                | Male             |
| 32 | (Ehrmann et al., 2016) [62]    | <i>JSCR</i>                      | 1 Season                        | Soccer       | 19  | Professional                       | Male             |
| 33 | (Malisoux et al., 2013) [63]   | <i>J Sci Med Sport</i>           | 41 weeks                        | Varied       | 154 | High-school                        | Both (65% males) |
| 34 | (Visnes & Bahr, 2013) [64]     | <i>Scand J Med Sci Sports</i>    | 4 years (231 Student-seasons)   | Volleyball   | 141 | Elite high school                  | Both (72F, 69M)  |

**Table 2:** Broad injury definitions used in workload—injury investigations

| <b>Injury Definition</b>                                                | <b>N</b> |
|-------------------------------------------------------------------------|----------|
| <b>Time-Loss</b>                                                        |          |
| All time-loss                                                           | 13       |
| Match time-loss                                                         | 2        |
| Non-contact time-loss                                                   | 7        |
| Non-contact match time-loss                                             | 1        |
| <b>Medical Attention</b>                                                |          |
| Medical attention                                                       | 7        |
| Player-reported pain, soreness, or discomfort                           | 1        |
| Non-contact medical attention injuries                                  | 1        |
| Clinical diagnosis of jumper's knee                                     | 1        |
| <b>Other</b>                                                            |          |
| Injury scale on the Recovery-Stress Questionnaire for Athletes (REST-Q) | 1        |

#### Subsequent or recurrent injuries

Of the 34 articles, 30 did not define or include subsequent or recurrent injuries. Of those that explicitly addressed subsequent injuries, two defined these injuries as those occurring at the same time and occurring by the same mechanism [58,60]. Two articles explicitly stated that they only considered time until first injury, meaning no injuries were subsequent or recurrent [41,43].

#### Workload definitions

Workload variables varied widely across articles and are summarized in Table 3. For a more detailed description of each article's load measures, see the Online Supplementary Appendix. Many articles used workload metrics to derive additional variables from workload distribution over time (e.g. monotony, strain, acute: chronic workload ratios).



**Table 3:** Independent variables used in workload—injury investigations

| <b>Workload Measure</b>   | <b>N</b> |
|---------------------------|----------|
| Internal                  |          |
| - sRPE                    | 15       |
| - Heart rate zones        | 2        |
| External                  |          |
| - Balls bowled or pitched | 5        |
| - GPS / accelerometry     | 10       |
| - Hours                   | 6        |

\* If articles included more than one type of workload variable they are counted more than once. sRPE scores could be the original Foster scale or modified. GPS – Global positioning system. sRPE – Session-rating of perceived exertion (calculated as the product of session intensity on a 1-10 Borg Scale and activity duration in minutes).

#### Measurement frequency

Most included articles (n=32) collected workload data at every session that athletes completed, while 2 studies recorded workload on a weekly basis [59,64].

#### Handling missing data

Twenty-three of the 34 articles (67%) did not report any strategies for missing data. Of those that did, 5 used listwise or casewise deletion, and 6 used estimation. Estimation methods for players missing data included techniques such as: using the full team average values for the drills a player completed [61], using an individual's mean weekly value [57], and multiplying player's pre-season per-minute match data by the number of minutes they played in a match [36].

### Statistical analysis and reporting in included articles

#### Data binning/aggregation

Although 32 articles collected daily workload measurements, many aggregated data for analysis. Most (n = 16) summed workload metrics for a total or average weekly workload. Three studies aggregated workload

data for the entire year, 3 aggregated data into season periods, 2 aggregated data monthly, and 3 used multiple aggregation strategies.

## Analysis methods

Table 4 summarises the statistical practices of applied researchers investigating the relationship between workload and injury. Although some studies had analysed other primary or secondary objectives, we recorded only the analyses used to investigate the workload – injury relationship.

**Table 4:** The number of studies using various statistical analysis techniques

| Analytical Method                        | N  |
|------------------------------------------|----|
| Regression modelling                     |    |
| - Logistic                               |    |
| o Regular                                | 10 |
| o Generalised Estimating Equation        | 5  |
| o Multilevel                             | 1  |
| - Linear                                 |    |
| o Regular                                | 2  |
| - Poisson                                |    |
| o Generalised Estimating Equation**      | 1  |
| - Multinomial regression                 |    |
| o Regular                                | 1  |
| - Cox proportional hazards model         | 1  |
| - Frailty model                          | 1  |
| Correlation                              |    |
| - Pearson                                | 9  |
| - Spearman                               | 1  |
| Relative risk/rate ratio*                | 8  |
| T-tests                                  |    |
| - Paired and independent samples         | 4  |
| - Independent samples only               | 2  |
| Chi-square tests                         | 1  |
| Repeated measures ANOVA (one or two-way) | 5  |

If articles used more than one statistical method to analyse workload and injury, they are included more than once in the table. We only report analyses used to analyse workload–injury associations, not other analyses reported in the articles (e.g. ANOVA to test for differences in total workloads at separate times of the season).

\* Relative risk here refers to the use of RR as a primary analysis based on risks in different categorical groups, not as an effect estimated from another model. For example, comparing risks among different load groups like Hulin et al., (2014, 2016, 2016) are counted here, whereas Gabbett and Ullah (2012) derived RR from their frailty model, and Clausen et al. (2014) derived RR from their Poisson model, but neither are included in the count for

1  
2  
3 RR.

4 \*\* Clausen et al. (2014) also report fitting multilevel models, but do not report any of the results – presenting only  
5 their GEE findings in their results and discussion.  
6  
7

8  
9 Typical uses of statistical tools

10 Regression approaches were used most commonly (22/34 studies). The most common approach was logistic  
11 regression (binary injury status as the outcome variable), independently or jointly modelling workload variables  
12 as independent variables. Generalised estimating equations were used in 5 studies to account for the clustering of  
13 observations within players and were used very similarly to simple logistic regression approaches.  
14  
15

16 Correlation was the second most common method (10/34 studies). Most studies that used correlation (7/10)  
17 measured the association between weekly or monthly workloads and injury incidence at the team level. Of those  
18 that used correlation at the individual level, two compared the number of completed pre-season sessions with the  
19 number of completed in-season sessions [23,65], while the final compared workload with injury operationalised  
20 as a numerical score on the injury subscale of the Recovery-Stress Questionnaire for Athletes (REST-Q) [45].  
21  
22

23 Relative risk approaches were generally used in one of two ways. First, workload categories were established for  
24 the entire year, like cricket bowlers who averaged <2, 2-2.99, 3-3.99, 4-4.99 or >5 days between bowling sessions  
25 up until an injury, or for the entire year if they did not sustain an injury [41]. Risks were calculated as the number  
26 of injuries/number of athletes in a given group, and relative risks were calculated to compare across groups [44].  
27  
28 In the second approach, athletes contributed exposures on a weekly basis, and thus contributed to multiple  
29 workload classifications. In this case, the likelihood/risk was the number of injuries/number of weekly player  
30 exposures to that workload category [33,53,61].  
31  
32

33 Group differences were sometimes evaluated using t-tests, ANOVAs or chi-square analyses. Typically, unpaired  
34 t-tests contrasted workload variables (e.g. mean sessions/week) between athletes who sustained an injury during  
35 the year, to those who did not [41,43]. Paired t-tests and repeated measures ANOVAs (one- or two-way) were  
36 most often used to contrast the workloads of the same athletes at different time periods. For example, workloads  
37  
38  
39  
40  
41  
42  
43  
44  
45  
46  
47  
48  
49  
50  
51  
52  
53  
54  
55  
56  
57  
58  
59  
60

1  
2  
3 in an ‘injury block’ (like the week preceding an injury), were contrasted with non-injury blocks, like other weeks  
4  
5 in the season [41,44], or the 4 weeks preceding the injury block [63].  
6

#### 7 8 Justifications for statistical approaches 9

10 Authors of 15 of the included articles (44%) did not cite any sources to support their analytical choices. Of those  
11 who did, most (n=14) cited previous literature in the sports medicine field. Eight articles referenced statistics or  
12 methodology articles, 4 cited articles on Prof. Will Hopkins’ website ([www.sportssci.org](http://www.sportssci.org)), and 3 cited statistical  
13 textbooks [66–68].  
14  
15  
16  
17  
18

#### 19 20 Addressing analysis assumptions and model fit 21

22  
23 More than half (n = 20) the included articles did not report on the assumptions underlying their statistical  
24 analyses. Among those that did report on analysis assumptions, checks included checks for normality, collinearity  
25 of predictor variables in regression analyses [55], sphericity for repeated measures ANOVA [45], overdispersion  
26 [59], or correlation structures for generalised estimating equations [40].  
27  
28  
29  
30

31  
32 When authors reported checking for normality, Shapiro-Wilk [65] or Kolmogorov-Smirnov tests [32] were  
33 referenced. Regression modelling was the most common analysis to investigate the workload—injury association.  
34  
35 In 8/10 instances where simple logistic regression was chosen, the authors appear to have conducted the analyses  
36 using weekly observations without accounting for the dependencies created by repeated-measures across players.  
37  
38 In all instances where regression was used, it was uncommon for authors to report that model assumptions were  
39 checked. Where multiple regression approaches were used, multicollinearity checks were rarely reported – an  
40 important consideration since multicollinearity can cause imprecise estimates of regression coefficients when  
41 multiple workload variables are simultaneously modelled [55,69,70].  
42  
43  
44  
45  
46  
47  
48  
49

50 Of the papers that modelled data using regression or similar techniques, six described how they assessed model  
51 fit. Some authors assessed specificity/sensitivity, or receiver operating characteristics, either on the current data  
52 set [64], or future data set [49]. Other in-sample model fit indices  $R^2$  values [60], Aikeke Information Criteria  
53  
54  
55  
56  
57  
58  
59

1  
2  
3 (AIC) and Bayesian Information Criteria (BIC), which were sometimes mentioned as guiding the model selection  
4 process [54].  
5  
6  
7  
8  
9

#### 10 Alignment of authors' statistical models with theoretical model and temporal design challenges

11  
12  
13  
14 In Table 5 (a more detailed table – Table A2 - is available in Appendix 2), we qualitatively evaluated whether the  
15 statistical approaches chosen by the authors in our current review effectively addressed the key themes/challenges  
16 presented by the theoretical model and the temporal design (intensive longitudinal data). This table is an  
17 analytical tool to guide the reader through the discussion. It highlights the themes/challenges of the theoretical  
18 model and temporal design, as well as the strengths/weaknesses of the statistical tools used in included studies.  
19  
20 The table has the challenges/themes in columns and statistical tools in rows. The reader can follow a row to see  
21 how well a given statistical tool addressed key challenges as used by researchers in our included articles, or they  
22 can choose a challenge and follow the column down to see which analyses were used in a way that addressed that  
23 challenge adequately. The rows are ordered according to their qualitative 'score'. As one proceeds down the rows,  
24 the statistical tools address more of the temporal design and theoretical model challenges.  
25  
26  
27  
28  
29  
30  
31  
32  
33  
34  
35  
36

37 We caution the reader that (1) not every possible statistical tool is included in the table, only those used in at least  
38 1 article in our review, and (2) the evaluation is based on whether researchers of our included papers used a test in  
39 a way that addressed a given challenge, not necessarily whether the test is capable of being used in a way that  
40 meets that challenge. For example, a logistic regression analysis conducted using a generalised estimating  
41 equation framework can include multiple explanatory/predictor variables, thereby allowing for a multifactorial  
42 model. However, some authors used GEEs and only included one predictor variable [42,48], in which case the  
43 GEE did not address the multifactorial theme.  
44  
45  
46  
47  
48  
49  
50  
51  
52  
53

## 54 **DISCUSSION**

55  
56  
57  
58  
59  
60

1  
2  
3 We used the workload—injury field of medical research to examine whether statistical approaches analyse  
4 intensive longitudinal data optimally. By design, the theoretical models underpinning the workload—injury field  
5 and the temporal design (ILD) were aligned in all the included articles, but common statistical approaches varied  
6 in how adequately they addressed the key themes needed to align them with the other two components.  
7  
8  
9  
10

### 11 12 **Consideration #1 – Theoretical theme – multifactorial aetiology**

13 Sports injury aetiology models of the last 2 decades have highlighted the multifactorial nature of athletic injury.  
14 [19,21]. We asked whether the burgeoning body of research relating workloads and injury, is using modern  
15 statistical methods to capture workloads while incorporating known risk factors. Few articles in this review  
16 incorporated previously identified risk factors and workload into the same analysis. In some instances, the  
17 analytical approach prevented this from being an option. For example, simple analyses like t-tests, correlations,  
18 and chi-square tests do not allow for multiple variables to be included. In other instances, the statistical  
19 approaches allowed a multifactorial approach (e.g. generalised estimating equations) but researchers opted to  
20 focus on the effects of workloads in isolation [42,48].  
21  
22  
23  
24  
25  
26  
27  
28  
29  
30

31 Including known risk factors in workload—injury investigations is important from an aetiological perspective in  
32 at least two ways. First, failing to control for known risk factors may mean that key confounding variables are not  
33 included in the analysis and the relationship between workloads and injury are spurious. For example, women  
34 have a 2-6 times higher risk of ACL injury in soccer than their male counterparts [71,72]. If a study included both  
35 male and female soccer players and did not account for sex in the analysis, then differences in workload may be  
36 spuriously correlated with injury rates if male and female players performed varying levels of workload.  
37 Depending on the injury type and sporting group, previous injury, age, sex, physiological and/or biomechanical  
38 variables may all be important to include.  
39  
40  
41  
42  
43  
44  
45  
46  
47

48 Secondly, by including additional risk factors into the analysis, the investigator may be able to identify  
49 moderation or effect-measure modification to better understand how risk factors and workload jointly contribute  
50 to injury risk [73,74]. As a reminder, there are subtle, but important differences between mediation, moderation,  
51 and effect measure modification that will influence analytical choices [75,76]. Effect modification occurs when  
52  
53  
54  
55  
56  
57  
58  
59  
60

1  
2  
3 the effect of a treatment or condition (e.g. a given workload demand), differs among different athlete groups.  
4  
5 Interaction (or moderation), although similar, examines the joint effect of two or more variables on an outcome.  
6  
7 Finally, mediation is concerned with the pathway of exposure to a given outcome, and what are potentially  
8  
9 intermediate variables. Previously identified risk factors may aetiologically relate to workload in each of these  
10  
11 three ways and may be explored through different modelling strategies.  
12  
13  
14  
15  
16  
17  
18  
19  
20  
21  
22  
23  
24  
25  
26  
27  
28  
29  
30  
31  
32  
33  
34  
35  
36  
37  
38  
39  
40  
41  
42  
43  
44  
45  
46  
47  
48  
49  
50  
51  
52  
53  
54  
55  
56  
57  
58  
59  
60

**Table 5:** Evaluation of the degree to which authors’ use of statistical tools addressed theoretical and temporal design challenges

| Method                                                  | n  | Themes of theoretical model |                                        |                | Themes of temporal design - intensive longitudinal data |                          |                             |                                     |
|---------------------------------------------------------|----|-----------------------------|----------------------------------------|----------------|---------------------------------------------------------|--------------------------|-----------------------------|-------------------------------------|
|                                                         |    | Multifactorial aetiology    | Between and Within-Athlete Differences | Complex System | Includes Time-Varying and Time-Invariant Variables      | Missing/Unbalanced Data* | Repeated Measure Dependency | Incorporates Time into the Analysis |
| Correlation (Pearson and Spearman)                      | 10 | X                           | X                                      | X              | X                                                       | X                        | X                           | X                                   |
| Unpaired t-test                                         | 6  | X                           | X                                      | X              | X                                                       | X                        | X                           | X                                   |
| Chi-square tests                                        | 1  | X                           | X                                      | X              | X                                                       | X                        | X                           | X                                   |
| Relative risk calculations                              | 8  | O                           | X                                      | X              | X                                                       | X                        | X                           | X                                   |
| Regression (logistic, linear, multinomial)              | 13 | O                           | X                                      | X              | X                                                       | X                        | X                           | X                                   |
| Paired t-test                                           | 2  | X                           | X                                      | X              | X                                                       | X                        | ✓                           | ✓                                   |
| Repeated measures ANOVA (one or two-way)                | 5  | O                           | O                                      | X              | O                                                       | X                        | ✓                           | ✓                                   |
| Generalised Estimating Equations (Poisson and logistic) | 6  | O                           | X                                      | X              | O                                                       | ✓                        | ✓                           | O                                   |
| Cox proportional hazards model                          | 1  | ✓                           | X                                      | X              | X                                                       | ✓                        | ✓                           | ✓                                   |
| Multilevel modeling                                     | 1  | ✓                           | ✓                                      | X              | ✓                                                       | ✓                        | ✓                           | X                                   |
| Frailty model                                           | 1  | ✓                           | ✓                                      | X              | ✓                                                       | ✓                        | ✓                           | ✓                                   |

Qualitative assessment performed on a three-tiered scale. An ‘X’ (red formatting) means that none of the authors using this tool adequately addressed that specific challenge. In some cases, this may be because the statistical model was unable to address it, and other times it may be because of the way they used it. An ‘O’ (yellow formatting) indicates that some authors addressed that challenge while others did not. This generally happened when the statistical tool could address a challenge but the authors sometimes chose not to use it in that way. A ‘✓’ (green formatting) indicates that all authors using this statistical tool addressed that challenge adequately. \*Missing/unbalanced data here is that caused by intensive longitudinal data – meaning a different number of observations for each athlete during the observation period, some of which may be missing.



1  
2  
3 Statistical approaches that allow multivariable analyses enabled researchers to examine the effects of workloads  
4 while controlling for known risk factors. Malisoux et al. (2013) used a Cox-proportional hazards model to control  
5 for age and sex while examining the effects of average training volume and intensity. Gabbett and Ullah's frailty  
6 model (2012) incorporated previous injury – a proven injury risk factor – into the evaluation of the influence of  
7 different GPS workloads on injury risk. When investigating multifactorial phenomena, statistical approaches that  
8 enable multiple explanatory variables provide a more appropriate option.  
9  
10  
11  
12  
13  
14  
15

### 16 17 **Consideration #2 – Theoretical theme - between and within-athlete differences**

18 One of the primary benefits of ILD is that it enables researchers (when using certain analyses) to differentiate  
19 within-person and between-person effects [3]. In the sports medicine field, this would correspond to researchers  
20 asking, (1) why do some athletes suffer few injuries (between-person inquiry) while others appear 'injury-prone'?  
21 and on the other hand, (2) at what point is a given athlete (within-person inquiry) more likely to sustain an injury?  
22  
23 The simpler statistical approaches used by researchers in our included studies (correlation, t-tests, ANOVAs,  
24 regular regression) are limited in the number of variables they can include, and consequently cannot differentiate  
25 risk between- and within-athletes. Tests of group differences (independent sample t-tests and one-way ANOVAs)  
26 only differentiate between athletes (e.g. injured vs. uninjured), while repeated measures tests (repeated measures  
27 ANOVA and paired t-tests) only examine within-athlete differences (e.g. loads preceding injuries vs. loads during  
28 non-injury weeks).  
29  
30  
31  
32  
33  
34  
35  
36  
37  
38  
39

40 Generalised estimating equations (GEE) were commonly used to address some of the longitudinal data  
41 challenges. Although this approach accounts for the clustering within-persons, it assumes the effects of predictor  
42 variables are constant across all athletes [77]. Simple Cox proportional hazards models (Malisoux et al. 2013) are  
43 common in survival analyses, but do not differentiate between- and within-person effects [78].  
44  
45  
46  
47  
48

49 Only two statistical tools were used in a way that examined between- and within-athlete differences in injury risk.  
50 The frailty model by Gabbett and Ullah (2012) modelled each athlete as a random effect with a given frailty. The  
51 multilevel model by Windt et al., (2016) incorporated athlete-level variables (age, position, pre-season sessions)  
52 and observation-level variables (weekly workload measures). In the latter case, athletes' weekly distances did not  
53  
54  
55  
56  
57  
58  
59  
60

1  
2  
3 affect their risk of injury in the subsequent week (OR = 0.82 for 1 standard deviation increase, 95% CI = 0.55 to  
4 1.21) – a within-athlete inquiry. However, controlling for weekly distance and the proportion of distance at high  
5 speeds, athletes who had completed a greater number of pre-season training sessions had significantly reduced  
6 odds of injury (OR = 0.83 for each 10 pre-season sessions, 95% CI = 0.70 to 0.99) – a between-athlete inquiry.  
7  
8 These two examples highlight that certain analyses carry a distinct advantage of allowing researchers to tease out  
9 differences both between- and within- study participants  
10  
11  
12  
13  
14  
15

### 16 **Consideration #3 – Theoretical theme - injury risk as a complex dynamic system**

17 Complex systems are defined, among other things, by the interaction between multiple internal and external  
18 variables that interact to produce an outcome. Simple analyses (t-tests, correlations), which cannot incorporate  
19 multiple variables, cannot examine the interaction between multiple factors. However, even other traditional  
20 analyses which are more effective in handling the challenges of longitudinal data (e.g. generalised estimating  
21 equations, Cox-proportional hazards models) were not used to incorporate non-linear interactions between  
22 predictor variables.  
23  
24  
25  
26  
27  
28  
29

30  
31 The most recent reviews of athletic injury aetiology have highlighted complex systems models [24,79]. None of  
32 the analyses included in our review analysed intensive longitudinal workload—injury data with statistical  
33 analyses that fit within a complex systems framework. This lack of research may reflect the fact that the  
34 suggestion that injury aetiology fits within a dynamic, complex systems framework is still relatively ‘new’ in this  
35 field. It remains to be seen whether a complex systems approach and the analyses recommended in such reviews  
36 (e.g. self-organising feature maps, classification and regression trees, agent based models, etc.) are more effective  
37 for evaluating the association between workloads and injury [24].  
38  
39  
40  
41  
42  
43  
44  
45  
46  
47  
48

### 49 **Consideration #4 – ILD challenge – including time-varying and time-invariant variables**

50  
51 Tying back to the theoretical model of workloads and injury, some relevant factors may be relatively stable (time-  
52 invariant) over the course of an observation period (e.g. height, age), while others are time-varying (e.g.  
53 workload). Some analyses can incorporate both time-varying and time-invariant variables, while others are  
54  
55  
56  
57  
58  
59

1  
2  
3 limited in this respect. All analyses that cannot or did not address the multifactorial nature of injury cannot  
4 include time-varying and time-invariant variables concurrently. Group difference tests (t-tests, ANOVAs, etc.)  
5 may collect time-varying measures, but must aggregate them into a single average for analysis.  
6  
7  
8  
9

10 Including time-varying and stable variables in the same analysis links closely to between- and within-athlete  
11 differences – with the frailty model [51] and multilevel model [54] both used in a way that allowed the  
12 researchers to include both. The one exception in our included studies was the generalised estimating equation  
13 approach. As mentioned earlier, the GEE assumes an ‘overall’ effect for each explanatory variable, such that  
14 between- and within-athlete differences cannot be differentiated [80]. However, the major benefit to a GEE is that  
15 it accounts for the repeated measures for each participant and can therefore include both time-invariant and time-  
16 varying variables for each participant.  
17  
18  
19  
20  
21  
22  
23  
24  
25

#### 26 **Consideration #5 – ILD challenge – handling missing and unbalanced data**

27 Dealing with missing and unbalanced data is a near certainty when collecting ILD, and is common in applied  
28 workload-monitoring settings [81]. Such missing data decreases statistical power and increases bias, and may be  
29 missing at completely at random (MCAR), missing at random (MAR), or missing not at random (MNAR). When  
30 analysing aggregated data or using analyses that require balanced data, strategies may include complete-case  
31 analysis, last observation carried forward, or various imputation methods [82,83]. Multiple imputation methods,  
32 of which there are many, involves replacing missing values with values imputed from the observed data and is  
33 preferred over single imputation. Finally, if interactions are included in regression analyses, the transform-then-  
34 impute method has been recommended [84].  
35  
36  
37  
38  
39  
40  
41  
42  
43  
44

45 However, these missing data approaches are not recommended for longitudinal analyses, since researchers have  
46 statistical analyses that are robust to missing and unbalanced data at their disposal [85]. Statistically, four types of  
47 analyses used in this review are robust to missing and unbalanced data – Cox proportional hazards models, GEEs,  
48 multilevel models, and frailty models, where all observations can be included in the analysis, and athletes can  
49 have different numbers of observations. Since mixed/multilevel models have less stringent assumptions for  
50  
51  
52  
53  
54  
55  
56  
57  
58  
59  
60

1  
2  
3 missing data (i.e. missing at random) than generalized estimating equations (i.e. missing completely at random),  
4  
5 they have been suggested over GEEs [85].  
6  
7

8 While the statistical concerns related to unbalanced data may be addressed with these analyses, missing data may  
9  
10 also affect derived variables, which are common in workload—injury research. These derived variables include  
11  
12 rolling workload averages (e.g. one-week, ‘acute’, workloads, four-week average, ‘chronic’, workloads, etc.)  
13  
14 [33,61], ‘monotony’ (average weekly workload divided by the standard deviation of that workload) or ‘strain’ (the  
15  
16 monotony multiplied by the average weekly workload) [30]. Since these measures are all calculated from  
17  
18 workloads accumulated over time, failing to estimate workloads for these missing sessions (that end up being  
19  
20 treated as ‘0’ workload days) means inferences from these derived measures may be underestimated and  
21  
22 unreliable. Few authors discussed how they handled missing data. In these instances – it is important that  
23  
24 researchers report how they accounted for missing data, whether they be strategies employed in the past – e.g. full  
25  
26 team average values (Bowen et al., 2016), weekly individual averages (Brink et al., 2010), player specific per-  
27  
28 minute values by time played (Colby et al., 2014) – or whether through other advanced imputation methods  
29  
30 recommended for ILD [82,84].  
31  
32  
33

#### 34 **Challenge #6 – ILD challenge – dependencies created by repeated measures**

35 Collecting ILD in applied sport settings means repeated (often daily) measurements of the same athlete – such  
36  
37 that observations are clustered within athletes. Comparisons of independent groups, through chi-square tests,  
38  
39 independent sample t-tests and one-way/two-way ANOVAs all assume participants contribute a single  
40  
41 observation to the analysis and force an aggregated variable (e.g. average number of balls bowled in a week) to  
42  
43 conduct the analysis [41]. Similarly, correlation and simple regression (in its linear, logistic, and multinomial  
44  
45 forms) assume independence of observations [86]. Paired t-tests and repeated measures ANOVA were used to  
46  
47 deal with repeated measurements by comparing the same athletes’ workloads at different periods (e.g. the week  
48  
49 before injury vs. weeks that did no precede injury).  
50  
51  
52

53 Of the analyses that addressed this challenge, GEEs were used most commonly ( 6 studies). GEE’s ability to  
54  
55 handle clustering was also used in one article to control for players clustering within teams [59]. Cox proportional  
56  
57  
58  
59  
60

1  
2  
3 hazard models, used in one article [63], can handle repeated measurements for participants [87]. Multilevel  
4  
5 models [54] and frailty models [51] – an extension of the Cox- proportional hazards model – were also used in a  
6  
7 single instance each, where repeated measures were clustered within players through a random player effect.  
8  
9

10 As mentioned in our introduction, there may be additional data dependency created by recurrent injuries [88].  
11  
12 Previous recommendations to handle the recurrent injury challenges have included frailty models [89], and a  
13  
14 multistate framework [90]. However, as so few articles reported collecting information on recurrent injuries (n =  
15  
16 5), we focused primarily on the dependencies caused by repeated measures across participants.  
17  
18

### 19 **Challenge #7 – ILD challenge – incorporating time into the analysis / temporality**

20  
21 One of the most relevant questions in ILD analyses is the way that time is accounted for [1,3]. Some authors used  
22  
23 one-way [32] and two-way repeated measures ANOVAs [46] to compare loading in different seasons or season-  
24  
25 periods – a very simple way of accounting for time. Repeated measures ANOVAs [62,63,65] and paired t-tests  
26  
27 [41,44] also account for time by categorising time-periods as pre-injury blocks or non-injury blocks. Multilevel  
28  
29 models have been used to examine change through the interactions of variables with time, but the one multilevel  
30  
31 model used in this review did not include time as a covariate [54]. Survival analyses explicitly account for time by  
32  
33 calculating the effects of variables on the predicted time-to-event [51,63]. Notably, only one analysis – the frailty  
34  
35 model (Gabbett and Ullah, 2012) – adjusted the probability of long-term outcomes (e.g., injury) based on  
36  
37 variations after an initial capture of risk, something few traditional analyses accomplish (Cook 2016).  
38  
39

40  
41 Temporality is also vital in considering potential causal associations. While making causal inferences from  
42  
43 observational data is a topic beyond the scope of this paper, temporality is a well-accepted component of causality  
44  
45 dating back, at least, to Bradford Hill's 'criteria' [91]. Without temporality – where a postulated cause precedes  
46  
47 the outcome – directional associations cannot be made [92,93]. A lack of temporality can also skew associations  
48  
49 since it allows for reverse causality. In the workload—injury field, findings that high weekly workloads are  
50  
51 sometimes associated with lower odds of injury in a given week [40,54] may be in part because players who get  
52  
53 injured in a given week are less likely to accumulate high weekly workloads.  
54  
55  
56  
57  
58  
59

1  
2  
3 Trying to account for temporality, some researchers have included a latent period – where workload variables are  
4 examined for their association with injury occurrence in a given proceeding time window, like the subsequent  
5 week [33,54]. While recent work has noted that the length of the latent period may affect model findings [94], it is  
6 clear that without some type of latent period, any directional inferences between workloads and injury cannot be  
7 made.  
8  
9  
10  
11  
12

### 13 14 **Methodological, statistical and reporting considerations**

#### 15 16 Data aggregation

17  
18 Data aggregation was common, whether in data preparation, or forced through the analysis. In some cases,  
19 researchers aggregated individual level data into team-level measures (total/average workload and injury  
20 incidence). Although 32/34 articles collected daily data, most aggregated these daily data into weekly measures,  
21 potentially contributing to temporality problems if no latent period was included. Finally, certain analyses (e.g.  
22 paired t-tests, simple logistic regression) aggregated data for athletes across an entire year so that workload  
23 measures were used to control for exposure [56,64]. Differences in analyses make it impossible to measure the  
24 effect of fluctuations in workload and potential impact on injury risk. Further, with no latent period, the  
25 directionality of the relationship is unclear. For example, players with high exposure throughout the year were at a  
26 lower injury risk than the intermediate group, but it could be interpreted that players who do not sustain an injury  
27 throughout the year are more likely to accumulate high total training and match exposures (i.e. higher workload)  
28 [56]. Aggregated data may be easier to analyse but comes at the cost of losing some of the inherent benefits of  
29 collecting ILD, such as the changes in injury risk that occur at a daily level. As a result, theory-driven questions  
30 that relate to daily workload fluctuations and injury risk will become challenging, or impossible to answer.  
31  
32  
33  
34  
35  
36  
37  
38  
39  
40  
41  
42  
43  
44  
45  
46

#### 47 Checking model assumptions and fit

48  
49 While many studies may have under-reported how they assessed model assumptions or fit, others [55] provide an  
50 example for other researchers to emulate. In fitting a GEE to account for intra-team and intra-player clustering  
51 effects, they explained how they selected an appropriate autocorrelation structure, reported how potential  
52  
53  
54  
55  
56  
57  
58  
59  
60

1  
2  
3 quadratic relationships were assessed in the case of non-linear associations, and described checking for potential  
4 multicollinearity with defined thresholds (variance inflation factor >10) and for their GEE.  
5  
6

### 7 **Researcher ‘trade-offs’, consequences of misalignment**

8  
9 We used the workload—injury field to highlight seven themes that relate to theoretical injury aetiology models  
10 and temporal design (ILD). In many cases highlighted published studies’ statistical models either could not, or  
11 were not used in a way that addresses these themes. In some cases, misalignment may carry a severe cost – like  
12 assumption violations that may bias study results [29]. This is akin to building conclusions on an unstable  
13 foundation. Other times, researchers have properly employed their chosen statistical approach, but the approaches  
14 themselves were limited, and unable to answer research questions that ILD can address. This is more akin to  
15 having a grand building plan and all the necessary supplies, but only using a screwdriver to construct the building.  
16  
17

18 Simple regression models provide an ideal example of researchers’ trade-offs when using traditional statistical  
19 analyses on ILD, and the potential costs of misalignment. Although 13 papers used regular regression to analyse  
20 the association between workloads and injury outcome, they chose one of three paths when dealing with ILD.  
21 First, many proceeded to analyse each daily or weekly data point as an independent observation – not addressing  
22 the violation of the independence assumption [33,53,95]. Second, some researchers aggregated the workload data  
23 into an average weekly workload or total workload exposure over the course of the year, such that each  
24 participant contributed only one observation to a classic logistic regression [56,64]. Although the regression  
25 assumptions were not violated, workload was aggregated into a single metric, the temporal relationship between  
26 workload and injury was lost, and there was then no way to analyse the effects of workload fluctuations on injury  
27 risk. Third, some researchers converted individual data to team level data and examined team workloads with  
28 team injury incidence in a linear regression [47,60]. In this final case, no differentiation could then be made  
29 between players or within-players, and inferences were only possible at the team level. This may be sufficient to  
30 inform research on the association of workloads and injury at the team level, but the theoretical model  
31 underpinning team injury rates may differ from those that underpin individual athletes’ injury risk.  
32  
33  
34  
35  
36  
37  
38  
39  
40  
41  
42  
43  
44  
45  
46  
47  
48  
49  
50  
51  
52  
53

### 54 **Review limitations**



1  
2  
3 Previous systematic reviews investigating the workload—injury relationship have documented the challenges of  
4 identifying articles through classic systematic review search strategies [7,9]. Heterogeneous keywords and the  
5 breadth of sporting contexts have meant previous systematic reviews include many articles post-hoc that were not  
6 originally identified by their systematic searches (e.g. 29 of 67 articles in Jones [7], 12 of 35 articles in the paper  
7 by Drew and Finch [9]). Therefore, although we worked to identify articles through 6 systematic reviews [7–  
8 10,17,18] and the 2016 IOC consensus statement on athletic workloads and injury [11], we may have missed  
9 potentially eligible articles .  
10  
11

12 We used the cut-off for intensive longitudinal data (>20 observations) proposed by Collins (2006). However,  
13 there is no universal cut-off for ILD, with previous thresholds of ‘more than a handful’ [1], ten observations [96],  
14 or forty [3].  
15  
16

17 In some instances, authors’ analytical choices may have been attributable to factors outside of statistical  
18 considerations. For example, in lower level competitions, or in organizations with lower budgets, it may not have  
19 been feasible to collect multiple variables longitudinally with the available equipment or staff. In these types of  
20 instances, authors would be unable to employ a multifactorial approach, instead of choosing not to use one. Such  
21 external factors may have influenced the findings of this methodological review.  
22  
23

24 Finally, it was beyond the scope of this review to list every challenge posed by ILD, and we were not exhaustive  
25 in our discussion of different analyses and their capacity to handle the challenges. Where possible, we tried to  
26 identify the themes that are most common within the research field of Sport and Exercise Medicine field.  
27 Ultimately, our call to action is that statistical tools be chosen more thoughtfully so that the extensive work put  
28 into theory building and data collection is not short-changed by a sub-optimal statistical model.  
29  
30

### 31 **Longitudinal improvements in ILD analysis**

32  
33

34 Methods and statistical analyses evolve over time, as with all scientific inquiry. Therefore, it is possible that we  
35 were a little unfair to some earlier papers. For example, researchers may have chosen analyses that aligned with  
36 ‘their’ theoretical model at the time, not what is considered the most current theoretical model. However, most  
37  
38  
39  
40  
41  
42  
43  
44  
45  
46  
47



1  
2  
3 papers were published since 2010 – the dynamic, recursive aetiology model was introduced in 2007, and the  
4 multifactorial nature of injury risk has been highlighted since 1994 (Meeuwisse, 1994). As complex systems  
5 approaches are the most recently proposed theoretical model (Bittencourt et al., 2016, Hulme et al., 2015), it is not  
6 surprising that none of the included articles analysed the data within this type of framework, with the first analysis  
7 of its kind in sport injury research only appearing recently [97]. Further, some techniques for longitudinal data  
8 analysis have been developed and grown in popularity recently, so researchers may not have been aware of  
9 alternative approaches at the time of their studies.  
10  
11

12  
13  
14  
15  
16  
17  
18 As more statistical methods are developed and refined for longitudinal data analysis, researchers will continue to  
19 gain awareness and skills with these analyses and their implementation is likely to become more common. Some  
20 evidence for that progression can be seen in this review. If we were to assign a ‘method’ score to each analytical  
21 approach outlined in Table 1, assigning 0 for each red box, 0.5 for each yellow box, and 1 for each green box (e.g.  
22 correlation would score 0, while generalized estimating equations would score a 3.5), and then assign that score to  
23 each paper in the study, we could obtain a rough estimate of whether analytical approaches were improving over  
24 time. Breaking the papers roughly into four periods, the ‘average score’ for papers up to 2005 (n = 6) is 1.6,  
25 papers between 2006 and 2010 (n = 7) score an average of 1.9, papers between 2011-2015 (n=11) score 1.7, and  
26 papers since 2016 (n = 10) score an average of 2.3. Moreover, since the search for this current review was  
27 conducted, there have been promising developments in the sports medicine field and a continued improvement in  
28 longitudinal analysis. Recent publications have applied statistical models that more appropriately take advantage  
29 of the strengths inherent to ILD, and better align with the theoretical frameworks [98–103].  
30  
31  
32  
33  
34  
35  
36  
37  
38  
39  
40  
41  
42  
43

44 Mediation, effect measure modification, and interaction/moderation are all causal models which may also  
45 contribute to aetiological frameworks [104]. We recently proposed that traditional intrinsic and extrinsic risk  
46 factors may act as moderators or effect measure modifiers of the workload—injury association [73]. If that is true,  
47 the most appropriate statistical model would include workload measures as the independent variable of interest,  
48 and incorporate other risk factors such that these causal models can be investigated, whether by stratifying effects  
49 across different levels of these risk factors, or including an interaction term within regression [74]. While no  
50  
51  
52  
53  
54  
55  
56  
57  
58  
59  
60

1  
2  
3 included articles performed such an analysis, recent studies (not included in this review because it was published  
4 after our search) have started to adopt these approaches [100,105,106]. For example, Møller et al. used a frailty  
5 model with weekly workload fluctuations (decrease or <20% increase, 20-60% increase, and >60% increase) as  
6 the primary predictor variable in a frailty model. Known shoulder risk factors were treated as ‘effect measure  
7 modifiers’, so the model was stratified based on the presence or absence of a given risk factor (e.g. scapular  
8 dyskinesia) [76]. In so doing, the researchers used a statistical tool (Component #3) that addressed all the  
9 challenges inherent to longitudinal data (Component #2), conducting a multifactorial analysis that clearly  
10 differentiated both within- and between-athlete injury risk – key aspects of the theoretical model (Component #1).  
11  
12  
13  
14  
15  
16  
17  
18  
19  
20

### 21 **Future directions and recommendations for ILD analysis**

22 Researchers in the sports medicine field should be encouraged that the increased availability of ILD may improve  
23 understanding of athletes’ fluctuating injury risks – as articulated by their theoretical models. More advanced  
24 statistical techniques for longitudinal data are increasingly being developed and implemented across disciplines.  
25 This will enable sports medicine researchers to more accurately answer their theory-driven questions by taking  
26 advantage of the benefits of ILD. To capitalise on this understanding, researchers must choose statistical models  
27 that most closely align with their theory and that address longitudinal data challenges. Generalised estimating  
28 equations, a Cox proportional hazards model, a multilevel logistic model, and a frailty model were the 4 analyses  
29 that most closely approached this alignment within our included papers. However, there remains some clear room  
30 for improvement in the future.  
31  
32  
33  
34  
35  
36  
37  
38  
39  
40

41 First, although mixed modelling was only used in one study, these forms of analyses have inherent values over  
42 GEE methods and have been recommended for this reason [107]. Because of sample structure, mixed models  
43 prevent false positive associations and have an applied correction method that increases the power of the analysis  
44 [108]; a finding that is useful with the commonly smaller samples. Mixed models also carry a less stringent  
45 missing data assumption (missing at random) when compared with GEEs (missing completely at random).  
46 Further, whereas GEEs require the correlation structure to be chosen by the researcher (which may be wrong),  
47 mixed models model the correlation structure so that it can be investigated. Finally, GEEs assume a constant  
48  
49  
50  
51  
52  
53  
54  
55  
56  
57  
58  
59  
60

1  
2  
3 effect across all individuals in the model, while mixed models allow for individual level effects and for  
4  
5 differentiating these individual effects.  
6  
7

8 To borrow an example from another field and demonstrate the flexibility and utility of mixed effect models,  
9  
10 Russell et al. used daily stressor values from students during their first 3 college years to demonstrate that students  
11  
12 consumed more alcohol on high-stress days than low-stress days (within-person fixed effect) [109]. However, a  
13  
14 significant random effect between students suggested that some students experienced this increase in alcohol  
15  
16 consumption, while others did not. Finally, those students with a tendency to increase alcohol consumption with  
17  
18 stressors were more likely to have drinking-related problems in their 4<sup>th</sup> year [109]. For more information on  
19  
20 multilevel/mixed effect models for longitudinal analysis, readers are referred to a other helpful resources  
21  
22 [1,28,85,110,111].  
23  
24

25 Time-to-event models are another family of statistical models that have become a very common in clinical  
26  
27 research articles – reported in 61% of original articles in the New England Journal of Medicine in 2004-2005  
28  
29 [112] – but were used infrequently within our included articles. Notably, these models answer a different research  
30  
31 question – when does an event occur? These approaches can account for many of the ILD challenges [113–115].  
32  
33 Time-to-event models account for censoring, can incorporate time-varying exposures, time-varying effect  
34  
35 measure modifiers, and time-varying changes in injury status, and may be used to control for competing risks  
36  
37 [113]. As with other modelling techniques, the appropriate number of events per variable has been investigated,  
38  
39 and at least 5-10 events per variable are recommended for these types of models to prevent sparse data bias [116].  
40  
41 As long as this and other model assumptions are met, more advanced time-to-event models may be a valuable tool  
42  
43 for researchers analysing ILD [87,117,118].  
44  
45  
46

47 Lastly, computational modelling methods, which involves computer simulation has both pros and cons where  
48  
49 modelling injuries. On one hand, they may provide insight on the best ways to model certain predictor  
50  
51 variables[119], and open the door to more complex systems modelling (e.g. agent-based modelling) [97]. Though  
52  
53 they show promise, such simulation studies are based on artificially generated data and must be interpreted  
54  
55 carefully [120].  
56  
57  
58  
59  
60

1  
2  
3 More analytical approaches are available for ILD, but a full discussion of each of these is beyond the scope of this  
4 paper. For the interested reader, functional data analysis [121], machine learning approaches [98,101], time series  
5 analysis [122], and time-varying effect models [123] all show promise. Such analyses and others for ILD can be  
6 found in Walls and Schafer's landmark ILD textbook [1], and more recently, in the work of Bolger and  
7 Laurenceau [110].  
8  
9  
10  
11  
12

13  
14 We believe intensive longitudinal data provide an exciting opportunity for applied researchers and statisticians to  
15 collaborate moving forward. As the field continues to progress to more advanced analytical approaches that may  
16 better suit ILD, the need for collaboration with statisticians will be vital. In our included papers, few researchers  
17 referenced methodological or statistical references to justify their analytical approaches. In some instances, this  
18 may be attributable to using common, relatively simple analyses – one likely does not expect a citation for a t-test.  
19 Where such references existed, they were often to previous papers in the field, not statistical sources. In future  
20 longitudinal analyses, we encourage researchers to partner with a statistician, psychometrician, epidemiologist,  
21 biostatistician, etc [124]. Such fruitful collaborations may lead to statistical approaches that take full advantage of  
22 intensive longitudinal data by aligning theory, data collection and statistical analyses as seamlessly as possible.  
23  
24  
25  
26  
27  
28  
29  
30  
31  
32  
33  
34

## 35 CONCLUSION

36  
37 We used studies investigating the relationship between workloads and injury as a substrate to highlight to  
38 researchers how important it is to align their theoretical model, temporal design, and statistical model. In  
39 longitudinal research, thoughtfully chosen statistical analyses are those grounded in subject matter theory and that  
40 maximise the utility of the collected data. The three most common analyses in our included papers (logistic  
41 regression, correlations, and relative risk calculations) addressed one or none of the 3 key theoretical themes, and  
42 one or fewer of the 4 inherent challenges of intensive longitudinal data. In this example discipline, researchers  
43 have developed sophisticated theories and frequently collect data that enable them to test these theoretical models.  
44 The missing step, and future opportunity for researchers, is to avail themselves of all the tools at their disposal –  
45 choosing statistical models that address the ILD challenges and answer theory-driven research questions.  
46  
47  
48  
49  
50  
51  
52  
53  
54  
55  
56  
57  
58  
59  
60

1  
2  
3 **Contributions:** JW and TG searched for, screened, and identified appropriate systematic reviews and  
4 consensus statements. JW identified appropriate original data papers from included systematic  
5 reviews/consensus statements. JW and CA performed quality assessment of original data papers and  
6 coded the study methods. BZ provided the statistical feedback on the creation of the data extraction  
7 spreadsheet and advice on the approach of the methodological review. JW and BZ completed the  
8 qualitative assessment of whether authors' use of statistical tools aligned with theoretical or temporal  
9 design themes. BS, CA, BZ and KK provided early input during early stages of study development CC  
10 contributed to the original idea for the review, and contributed to the discussion section of the  
11 manuscript. JW compiled the first draft of the manuscript. CA, CC, BS, BZ, and KK all contributed to  
12 critical revision of multiple drafts of the current manuscript.  
13  
14  
15

16 **Acknowledgements:** The United States Coalition for the Prevention of Illness & Injury in Sport is a  
17 partner in the United States Coalition for the Prevention of Illness and Injury in Sport an International  
18 Research Centres for Prevention of Injury and Protection of Athlete Health supported by the  
19 International Olympic Committee (IOC).  
20  
21

22 Technical or equipment support for this study was not provided by any outside companies,  
23 manufacturers or organizations.  
24

25 **Funding:** JW was a Vanier Scholar funded by the Canadian Institutes of Health Research.  
26

27 **Competing interests:** None  
28

29 **Provenance and peer review:** Not commissioned, externally peer reviewed.  
30

31 **Ethics approval:** No ethics approval was sought for conducting this methodological review.  
32

33 **Data sharing statement:** We do not have any original data in the current methodological review to  
34 share.  
35  
36  
37  
38  
39  
40  
41  
42  
43  
44  
45  
46  
47  
48  
49  
50  
51  
52  
53  
54  
55  
56  
57  
58  
59  
60

## REFERENCES

- 1 Walls TA, Schafer JL. *Models for intensive longitudinal data*. Oxford [U.K.]: : Oxford University Press 2006. <http://www.loc.gov/catdir/enhancements/fy0636/2005047269-t.html> (accessed 13 Apr 2016).
- 2 Ginexi EM, Riley W, Atienza AA, *et al*. The promise of intensive longitudinal data capture for behavioral health research. *Nicotine Tob Res Off J Soc Res Nicotine Tob* 2014;**16 Suppl 2**:S73–5. doi:10.1093/ntr/ntt273
- 3 Hamaker EL, Wichers M. No Time Like the Present: Discovering the Hidden Dynamics in Intensive Longitudinal Data. *Curr Dir Psychol Sci* 2017;**26**:10–5. doi:10.1177/0963721416666518
- 4 Halson SL. Monitoring Training Load to Understand Fatigue in Athletes. *Sports Med* 2014;**44**:139–47. doi:10.1007/s40279-014-0253-z
- 5 McCall A, Carling C, Nedelec M, *et al*. Risk factors, testing and preventative strategies for non-contact injuries in professional football: current perceptions and practices of 44 teams from various premier leagues. *Br J Sports Med* 2014;**48**:1352–7. doi:10.1136/bjsports-2014-093439
- 6 Akenhead R, Nassis GP. Training Load and Player Monitoring in High-Level Football: Current Practice and Perceptions. *Int J Sports Physiol Perform* Published Online First: 9 October 2015. doi:10.1123/ijsp.2015-0331
- 7 Jones CM, Griffiths PC, Mellalieu SD. Training Load and Fatigue Marker Associations with Injury and Illness: A Systematic Review of Longitudinal Studies. *Sports Med* 2016;:1–32. doi:10.1007/s40279-016-0619-5
- 8 Black GM, Gabbett TJ, Cole MH, *et al*. Monitoring Workload in Throwing-Dominant Sports: A Systematic Review. *Sports Med* 2016;:1–14. doi:10.1007/s40279-016-0529-6
- 9 Drew MK, Finch CF. The Relationship Between Training Load and Injury, Illness and Soreness: A Systematic and Literature Review. *Sports Med* 2016;:1–23. doi:10.1007/s40279-015-0459-8
- 10 Gabbett TJ, Whyte DG, Hartwig TB, *et al*. The Relationship Between Workloads, Physical Performance, Injury and Illness in Adolescent Male Football Players. *Sports Med* 2014;**44**:989–1003. doi:10.1007/s40279-014-0179-5
- 11 Soligard T, Schwelnus M, Alonso J-M, *et al*. How much is too much? (Part 1) International Olympic Committee consensus statement on load in sport and risk of injury. *Br J Sports Med* 2016;**50**:1030–41. doi:10.1136/bjsports-2016-096581
- 12 Keselman HJ, Huberty CJ, Lix LM, *et al*. Statistical Practices of Educational Researchers: An Analysis of Their ANOVA, MANOVA, and ANCOVA Analyses. *Rev Educ Res* 1998;**68**:350–86. doi:10.2307/1170601
- 13 Weir A, Rabia S, Ardern C. Trusting systematic reviews and meta-analyses: all that glitters is not gold! *Br J Sports Med* 2016;:bjsports-2015-095896. doi:10.1136/bjsports-2015-095896

- 1  
2  
3 14 Collins L. Analysis of Longitudinal Data: The Integration of Theoretical Model, Temporal  
4 Design, and Statistical Model. *Annu Rev Psychol* 2006;**57**:505–28.  
5 doi:10.1146/annurev.psych.57.102904.190146  
6
- 7 15 Lemon SC, Wang ML, Haughton CF, *et al.* Methodological quality of behavioural weight loss  
8 studies: a systematic review. *Obes Rev* 2016;:n/a-n/a. doi:10.1111/obr.12412  
9
- 10 16 Gabbett TJ, Nassis GP, Oetter E, *et al.* The athlete monitoring cycle: a practical guide to  
11 interpreting and applying training monitoring data. *Br J Sports Med* 2017;:bjssports-2016-097298.  
12 doi:10.1136/bjssports-2016-097298  
13
- 14 17 Olivier B, Taljaard T, Burger E, *et al.* Which Extrinsic and Intrinsic Factors are Associated with  
15 Non-Contact Injuries in Adult Cricket Fast Bowlers? *Sports Med* 2015;:1–23. doi:10.1007/s40279-015-  
16 0383-y  
17
- 18 18 Whittaker JL, Small C, Maffey L, *et al.* Risk factors for groin injury in sport: an updated  
19 systematic review. *Br J Sports Med* 2015;**49**:803–9. doi:10.1136/bjssports-2014-094287  
20
- 21 19 Bahr R, Holme I. Risk factors for sports injuries — a methodological approach. *Br J Sports Med*  
22 2003;**37**:384–92. doi:10.1136/bjssm.37.5.384  
23
- 24 20 Bahr R, Krosshaug T. Understanding injury mechanisms: a key component of preventing injuries  
25 in sport. *Br J Sports Med* 2005;**39**:324–9. doi:10.1136/bjssm.2005.018341  
26
- 27 21 Meeuwisse WH. Assessing Causation in Sport Injury: A Multifactorial Model. *Clin J Sport Med*  
28 1994;**4**:166–170.  
29
- 30 22 Meeuwisse WH, Tyreman H, Hagel B, *et al.* A Dynamic Model of Etiology in Sport Injury: The  
31 Recursive Nature of Risk and Causation. *Clin J Sport Med* 2007;**17**:215–9.  
32 doi:10.1097/JSM.0b013e3180592a48  
33
- 34 23 Windt J, Gabbett TJ. How do training and competition workloads relate to injury? The  
35 workload—*injury aetiology model*. *Br J Sports Med* 2016;:bjssports-2016-096040. doi:10.1136/bjssports-  
36 2016-096040  
37
- 38 24 Bittencourt NFN, Meeuwisse WH, Mendonça LD, *et al.* Complex systems approach for sports  
39 injuries: moving from risk factor identification to injury pattern recognition—narrative review and new  
40 concept. *Br J Sports Med* 2016;:bjssports-2015-095850. doi:10.1136/bjssports-2015-095850  
41
- 42 25 Hulme A, Salmon PM, Nielsen RO, *et al.* Closing Pandora’s Box: adapting a systems  
43 ergonomics methodology for better understanding the ecological complexity underpinning the  
44 development and prevention of running-related injury. *Theor Issues Ergon Sci* 2017;**18**:338–59.  
45 doi:10.1080/1463922X.2016.1274455  
46
- 47 26 Cook C. Predicting future physical injury in sports: it’s a complicated dynamic system. *Br J*  
48 *Sports Med* 2016;:bjssports-2016-096445. doi:10.1136/bjssports-2016-096445  
49  
50  
51  
52  
53  
54  
55  
56  
57  
58  
59



- 1  
2  
3 27 Sun L, Wu R. Mapping complex traits as a dynamic system. *Phys Life Rev* 2015;**13**:155–85.  
4 doi:10.1016/j.plrev.2015.02.007  
5
- 6 28 Hoffman L. *Longitudinal Analysis: Modeling Within-Person Fluctuation and Change*. Routledge  
7 2014. <http://www.tandfebooks.com/isbn/9781315744094> (accessed 8 Apr 2016).  
8
- 9 29 Wilkinson M, Akenhead R. Violation of statistical assumptions in a recent publication? *Int J*  
10 *Sports Med* 2013;**34**:281. doi:10.1055/s-0032-1331775  
11
- 12 30 Anderson L, Triplett-McBride T, Foster C, *et al*. Impact of training patterns on incidence of  
13 illness and injury during a women’s collegiate basketball season. *J Strength Cond Res* 2003;**17**:734–8.  
14
- 15 31 Brooks JHM, Fuller CW, Kemp SPT, *et al*. An assessment of training volume in professional  
16 rugby union and its impact on the incidence, severity, and nature of match and training injuries. *J Sports*  
17 *Sci* 2008;**26**:863–73. doi:10.1080/02640410701832209  
18
- 19 32 Killen NM, Gabbett TJ, Jenkins DG. Training Loads and Incidence of Injury During the  
20 Preseason in Professional Rugby League Players: *J Strength Cond Res* 2010;**24**:2079–84.  
21 doi:10.1519/JSC.0b013e3181ddafff  
22
- 23 33 Hulin BT, Gabbett TJ, Blanch P, *et al*. Spikes in acute workload are associated with increased  
24 injury risk in elite cricket fast bowlers. *Br J Sports Med* 2014;**48**:708–12. doi:10.1136/bjsports-2013-  
25 092524  
26
- 27 34 Fuller CW, Ekstrand J, Junge A, *et al*. Consensus statement on injury definitions and data  
28 collection procedures in studies of football (soccer) injuries. *Br J Sports Med* 2006;**40**:193–201.  
29 doi:10.1136/bjism.2005.025270  
30
- 31 35 Rogalski B, Dawson B, Heasman J, *et al*. Training and game loads and injury risk in elite  
32 Australian footballers. *J Sci Med Sport* 2013;**16**:499–503. doi:10.1016/j.jsams.2012.12.004  
33
- 34 36 Colby MJ, Dawson B, Heasman J, *et al*. Accelerometer and GPS-Derived Running Loads and  
35 Injury Risk in Elite Australian Footballers: *J Strength Cond Res* 2014;**28**:2244–52.  
36 doi:10.1519/JSC.0000000000000362  
37
- 38 37 Duhig S, Shield AJ, Opar D, *et al*. Effect of high-speed running on hamstring strain injury risk.  
39 *Br J Sports Med* 2016;:bjsports-2015-095679. doi:10.1136/bjsports-2015-095679  
40
- 41 38 Murray NB, Gabbett TJ, Townshend AD, *et al*. Individual and combined effects of acute and  
42 chronic running loads on injury risk in elite Australian footballers. *Scand J Med Sci Sports* 2016;:n/a-  
43 n/a. doi:10.1111/sms.12719  
44
- 45 39 Murray NB, Gabbett TJ, Townshend AD. Relationship Between Pre-Season Training Load and  
46 In-Season Availability in Elite Australian Football Players. *Int J Sports Physiol Perform* 2016;:1–21.  
47 doi:10.1123/ijsp.2015-0806  
48  
49  
50  
51  
52  
53  
54  
55  
56  
57  
58  
59  
60



- 1  
2  
3 40 Veugelers KR, Young WB, Fahrner B, *et al.* Different methods of training load quantification  
4 and their relationship to injury and illness in elite Australian football. *J Sci Med Sport* 2015;**19**:24–8.  
5 doi:10.1016/j.jsams.2015.01.001  
6
- 7 41 Dennis R, Farhart R, Goumas C, *et al.* Bowling workload and the risk of injury in elite cricket  
8 fast bowlers. *J Sci Med Sport* 2003;**6**:359–67. doi:10.1016/S1440-2440(03)80031-2  
9
- 10 42 Dennis R, Farhart P, Clements M, *et al.* The relationship between fast bowling workload and  
11 injury in first-class cricketers: a pilot study. *J Sci Med Sport Sports Med Aust* 2004;**7**:232–6.  
12  
13
- 14 43 Dennis RJ, Finch CF, Farhart PJ. Is bowling workload a risk factor for injury to Australian junior  
15 cricket fast bowlers? *Br J Sports Med* 2005;**39**:843–6. doi:10.1136/bjsm.2005.018515  
16
- 17 44 Saw R, Dennis RJ, Bentley D, *et al.* Throwing workload and injury risk in elite cricketers. *Br J*  
18 *Sports Med* 2011;**45**:805–8. doi:10.1136/bjsm.2009.061309  
19
- 20 45 Bresciani G, Cuevas MJ, Garatachea N, *et al.* Monitoring biological and psychological measures  
21 throughout an entire season in male handball players. *Eur J Sport Sci* 2010;**10**:377–84.  
22 doi:10.1080/17461391003699070  
23
- 24 46 Gabbett TJ. Reductions in pre-season training loads reduce training injury rates in rugby league  
25 players. *Br J Sports Med* 2004;**38**:743–9. doi:10.1136/bjsm.2003.008391  
26
- 27 47 Gabbett TJ. Influence of training and match intensity on injuries in rugby league. *J Sports Sci*  
28 2004;**22**:409–17. doi:10.1080/02640410310001641638  
29
- 30 48 Gabbett TJ, Domrow N. Relationships between training load, injury, and fitness in sub-elite  
31 collision sport athletes. *J Sports Sci* 2007;**25**:1507–19. doi:10.1080/02640410701215066  
32
- 33 49 Gabbett TJ. The development and application of an injury prediction model for noncontact, soft-  
34 tissue injuries in elite collision sport athletes. *J Strength Cond Res* 2010;**24**:2593–603.  
35 doi:10.1519/JSC.0b013e3181f19da4  
36
- 37 50 Gabbett TJ, Jenkins DG. Relationship between training load and injury in professional rugby  
38 league players. *J Sci Med Sport* 2011;**14**:204–9. doi:10.1016/j.jsams.2010.12.002  
39
- 40 51 Gabbett TJ, Ullah S. Relationship Between Running Loads and Soft-Tissue Injury in Elite Team  
41 Sport Athletes. *J Strength Cond Res* 2012;**26**:953–60. doi:10.1519/JSC.0b013e3182302023  
42
- 43 52 Hulin BT, Gabbett TJ, Lawson DW, *et al.* The acute:chronic workload ratio predicts injury: high  
44 chronic workload may decrease injury risk in elite rugby league players. *Br J Sports Med* 2015;  
45 2015-094817. doi:10.1136/bjsports-2015-094817  
46
- 47 53 Hulin BT, Gabbett TJ, Caputi P, *et al.* Low chronic workload and the acute:chronic workload  
48 ratio are more predictive of injury than between-match recovery time: a two-season prospective cohort  
49 study in elite rugby league players. *Br J Sports Med* 2016;  
50 2015-095364. doi:10.1136/bjsports-  
51 2015-095364  
52  
53  
54  
55  
56  
57  
58  
59  
60

- 1  
2  
3 54 Windt J, Gabbett TJ, Ferris D, *et al.* Training load--injury paradox: is greater preseason  
4 participation associated with lower in-season injury risk in elite rugby league players? *Br J Sports Med*  
5 2016;:bjsports-2016-095973. doi:10.1136/bjsports-2016-095973  
6
- 7 55 Cross MJ, Williams S, Trewartha G, *et al.* The Influence of In-Season Training Loads on Injury  
8 Risk in Professional Rugby Union. *Int J Sports Physiol Perform* Published Online First: 26 August  
9 2015. doi:10.1123/ijsp.2015-0187  
10
- 11 56 Arnason A, Sigurdsson SB, Gudmundsson A, *et al.* Risk Factors for Injuries in Football. *Am J*  
12 *Sports Med* 2004;**32**:5S-16S. doi:10.1177/0363546503258912  
13
- 14 57 Brink MS, Nederhof E, Visscher C, *et al.* Monitoring load, recovery, and performance in young  
15 elite soccer players. *J Strength Cond Res Natl Strength Cond Assoc* 2010;**24**:597–603.  
16 doi:10.1519/JSC.0b013e3181c4d38b  
17
- 18 58 Mallo J, Dellal A. Injury risk in professional football players with special reference to the  
19 playing position and training periodization. *J Sports Med Phys Fitness* 2012;**52**:631–8.  
20
- 21 59 Clausen MB, Zebis MK, Møller M, *et al.* High Injury Incidence in Adolescent Female Soccer.  
22 *Am J Sports Med* 2014;**42**:2487–94. doi:10.1177/0363546514541224  
23
- 24 60 Owen AL, Forsyth JJ, Wong DP, *et al.* Heart rate-based training intensity and its impact on  
25 injury incidence among elite-level professional soccer players. *J Strength Cond Res Natl Strength Cond*  
26 *Assoc* 2015;**29**:1705–12. doi:10.1519/JSC.0000000000000810  
27
- 28 61 Bowen L, Gross AS, Gimpel M, *et al.* Accumulated workloads and the acute:chronic workload  
29 ratio relate to injury risk in elite youth football players. *Br J Sports Med* 2016;:bjsports-2015-095820.  
30 doi:10.1136/bjsports-2015-095820  
31
- 32 62 Ehrmann FE, Duncan CS, Sindhusake D, *et al.* GPS and Injury Prevention in Professional  
33 Soccer. *J Strength Cond Res* Published Online First: 2015. doi:10.1519/JSC.0000000000001093  
34
- 35 63 Malisoux L, Frisch A, Urhausen A, *et al.* Monitoring of sport participation and injury risk in  
36 young athletes. *J Sci Med Sport* 2013;**16**:504–8. doi:10.1016/j.jsams.2013.01.008  
37
- 38 64 Visnes H, Bahr R. Training volume and body composition as risk factors for developing  
39 jumper's knee among young elite volleyball players. *Scand J Med Sci Sports* 2013;**23**:607–13.  
40 doi:10.1111/j.1600-0838.2011.01430.x  
41
- 42 65 Murray NB, Gabbett TJ, Townshend AD, *et al.* Individual and combined effects of acute and  
43 chronic running loads on injury risk in elite Australian footballers. *Scand J Med Sci Sports*  
44 2017;**27**:990–8. doi:10.1111/sms.12719  
45
- 46 66 Cohen J. *Statistical power analysis for the behavioral sciences*. 2nd. Hillsdale, NJ: erlbaum  
47 1988.  
48
- 49 67 Kraemer HC, Thiemann S. *How many subjects*. Citeseer 1987.  
50  
51  
52  
53  
54  
55  
56  
57  
58  
59  
60

- 1  
2  
3 68 Kutner MH, Nachtsheim C, Neter J. *Applied linear regression models*. McGraw-Hill/Irwin 2004.  
4  
5 69 Silvey SD. Multicollinearity and Imprecise Estimation. *J R Stat Soc Ser B Methodol*  
6 1969;**31**:539–52.  
7  
8 70 Zidek JV, Wong H, Le ND, *et al*. Causality, measurement error and multicollinearity in  
9 epidemiology. *Environmetrics* 1996;**7**:441–451.  
10  
11 71 Datson N, Hulton A, Andersson H, *et al*. Applied Physiology of Female Soccer: An Update.  
12 *Sports Med* 2014;**44**:1225–40. doi:10.1007/s40279-014-0199-1  
13  
14 72 Hewett TE, Myer GD, Ford KR. Anterior Cruciate Ligament Injuries in Female Athletes: Part 1,  
15 Mechanisms and Risk Factors. *Am J Sports Med* 2006;**34**:299–311. doi:10.1177/0363546505284183  
16  
17 73 Windt J, Zumbo BD, Sporer B, *et al*. Why do workload spikes cause injuries, and which athletes  
18 are at higher risk? Mediators and moderators in workload–injury investigations. *Br J Sports Med*  
19 2017;:bjsports-2016-097255. doi:10.1136/bjsports-2016-097255  
20  
21 74 Nielsen RO, Bertelsen ML, Møller M, *et al*. Training load and structure-specific load:  
22 applications for sport injury causality and data analyses. *Br J Sports Med* 2017;:bjsports-2017-097838.  
23 doi:10.1136/bjsports-2017-097838  
24  
25 75 Corraini P, Olsen M, Pedersen L, *et al*. Effect modification, interaction and mediation: an  
26 overview of theoretical insights for clinical investigators. *Clin Epidemiol* 2017;**9**:331–8.  
27 doi:10.2147/CLEP.S129728  
28  
29 76 VanderWeele TJ. On the Distinction Between Interaction and Effect Modification: *Epidemiology*  
30 2009;**20**:863–71. doi:10.1097/EDE.0b013e3181ba333c  
31  
32 77 Ghisletta P, Spini D. An Introduction to Generalized Estimating Equations and an Application to  
33 Assess Selectivity Effects in a Longitudinal Study on Very Old Individuals. *J Educ Behav Stat*  
34 2004;**29**:421–37. doi:10.3102/10769986029004421  
35  
36 78 Bellera CA, MacGrogan G, Debled M, *et al*. Variables with time-varying effects and the Cox  
37 model: Some statistical concepts illustrated with a prognostic factor study in breast cancer. *BMC Med*  
38 *Res Methodol* 2010;**10**:20. doi:10.1186/1471-2288-10-20  
39  
40 79 Hulme A, Finch CF. From monocausality to systems thinking: a complementary and alternative  
41 conceptual approach for better understanding the development and prevention of sports injury. *Inj*  
42 *Epidemiol* 2015;**2**. doi:10.1186/s40621-015-0064-1  
43  
44 80 Ward P, Coutts AJ, Pruna R, *et al*. Putting the ‘i’ Back in Team. *Int J Sports Physiol Perform*  
45 2018;:1–14. doi:10.1123/ijssp.2018-0154  
46  
47 81 Buchheit M. Applying the acute:chronic workload ratio in elite football: worth the effort? *Br J*  
48 *Sports Med* 2016;:bjsports-2016-097017. doi:10.1136/bjsports-2016-097017  
49  
50  
51  
52  
53  
54  
55  
56  
57  
58  
59  
60

- 1  
2  
3 82 Newgard CD, Lewis RJ. Missing Data: How to Best Account for What Is Not Known. *JAMA*  
4 2015;**314**:940–1. doi:10.1001/jama.2015.10516  
5
- 6 83 El-Masri MM, Fox-Wasylyshyn SM. Missing data: an introductory conceptual overview for the  
7 novice researcher. *Can J Nurs Res Rev Can Rech En Sci Infirm* 2005;**37**:156–71.  
8
- 9 84 Hippel PTV. How to Impute Interactions, Squares, and Other Transformed Variables. *Sociol*  
10 *Methodol* 2009;**39**:265–91. doi:10.1111/j.1467-9531.2009.01215.x  
11
- 12 85 Gibbons RD, Hedeker D, DuToit S. Advances in Analysis of Longitudinal Data. *Annu Rev Clin*  
13 *Psychol* 2010;**6**:79–107. doi:10.1146/annurev.clinpsy.032408.153550  
14
- 15 86 McDonald JH. *Handbook of biological statistics*. Sparky House Publishing Baltimore, MD 2009.  
16 <http://biostathandbook.com/HandbookBioStatSecond.pdf>  
17
- 18 87 Therneau TM, Grambsch PM. *Modeling survival data: extending the Cox model*. New York: :  
19 Springer 2000.  
20
- 21 88 Finch CF, Cook J. Categorising sports injuries in epidemiological studies: the subsequent injury  
22 categorisation (SIC) model to address multiple, recurrent and exacerbation of injuries. *Br J Sports Med*  
23 2014;**48**:1276–80. doi:10.1136/bjsports-2012-091729  
24
- 25 89 Ullah S, Gabbett TJ, Finch CF. Statistical modelling for recurrent events: an application to sports  
26 injuries. *Br J Sports Med* 2014;**48**:1287–93. doi:10.1136/bjsports-2011-090803  
27
- 28 90 Shrier I, Steele RJ, Zhao M, *et al*. A multistate framework for the analysis of subsequent injury  
29 in sport (M-FASIS). *Scand J Med Sci Sports* 2016;**26**:128–39. doi:10.1111/sms.12493  
30
- 31 91 Hill AB. The Environment and Disease: Association or Causation? *Proc R Soc Med*  
32 1965;**58**:295–300.  
33
- 34 92 Höfler M. The Bradford Hill considerations on causality: a counterfactual perspective. *Emerg*  
35 *Themes Epidemiol* 2005;**2**:11. doi:10.1186/1742-7622-2-11  
36
- 37 93 Rothman KJ, Greenland S. Causation and causal inference in epidemiology. *Am J Public Health*  
38 2005;**95 Suppl 1**:S144-150. doi:10.2105/AJPH.2004.059204  
39
- 40 94 Carey DL, Blanch P, Ong K-L, *et al*. Training loads and injury risk in Australian football—  
41 differing acute: chronic workload ratios influence match injury risk. *Br J Sports Med* 2016;**;**bjsports-  
42 2016-096309. doi:10.1136/bjsports-2016-096309  
43
- 44 95 Rogalski B, Dawson B, Heasman J, *et al*. Training and game loads and injury risk in elite  
45 Australian footballers. *J Sci Med Sport* 2013;**16**:499–503. doi:10.1016/j.jsams.2012.12.004  
46
- 47 96 Tan X, Shiyko MP, Li R, *et al*. A time-varying effect model for intensive longitudinal data.  
48 *Psychol Methods* 2012;**17**:61–77. doi:10.1037/a0025814  
49
- 50  
51  
52  
53  
54  
55  
56  
57  
58  
59

- 1  
2  
3 97 Hulme A, Thompson J, Nielsen RO, *et al.* Towards a complex systems approach in sports injury  
4 research: simulating running-related injury development with agent-based modelling. *Br J Sports Med*  
5 2018;:bjsports-2017-098871. doi:10.1136/bjsports-2017-098871  
6
- 7 98 Carey DL, Ong K-L, Whiteley R, *et al.* Predictive modelling of training loads and injury in  
8 Australian football. *ArXiv170604336 Stat* Published Online First: 14 June  
9 2017.<http://arxiv.org/abs/1706.04336>  
10
- 11 99 Colby MJ, Dawson B, Peeling P, *et al.* Multivariate modelling of subjective and objective  
12 monitoring data improve the detection of non-contact injury risk in elite Australian footballers. *J Sci*  
13 *Med Sport* Published Online First:  
14 2017.<http://www.sciencedirect.com/science/article/pii/S144024401730436X>  
15
- 16 100 Møller M, Nielsen RO, Attermann J, *et al.* Handball load and shoulder injury rate: a 31-week  
17 cohort study of 679 elite youth handball players. *Br J Sports Med* 2017;**51**:231–7. doi:10.1136/bjsports-  
18 2016-096927  
19
- 20 101 Rossi A, Pappalardo L, Cintia P, *et al.* Effective injury prediction in professional soccer with  
21 GPS data and machine learning. *ArXiv170508079 Stat* Published Online First: 23 May  
22 2017.<http://arxiv.org/abs/1705.08079>  
23
- 24 102 Stares J, Dawson B, Peeling P, *et al.* Identifying high risk loading conditions for in-season injury  
25 in elite Australian football players. *J Sci Med Sport* Published Online First: 25 May 2017.  
26 doi:10.1016/j.jsams.2017.05.012  
27
- 28 103 Williams S, Trewartha G, Cross MJ, *et al.* Monitoring What Matters: A Systematic Process for  
29 Selecting Training Load Measures. *Int J Sports Physiol Perform* 2016;:1–20. doi:10.1123/ijssp.2016-  
30 0337  
31
- 32 104 Wu AD, Zumbo BD. Understanding and Using Mediators and Moderators. *Soc Indic Res*  
33 2007;**87**:367. doi:10.1007/s11205-007-9143-1  
34
- 35 105 Williams S, Booton T, Watson M, *et al.* Heart Rate Variability is a Moderating Factor in the  
36 Workload-Injury Relationship of Competitive CrossFit™ Athletes. *J Sports Sci Med* 2017;**16**:443–9.  
37
- 38 106 Sampson JA, Murray A, Williams S, *et al.* Injury risk-workload associations in NCAA American  
39 college football. *J Sci Med Sport* Published Online First: 22 May 2018. doi:10.1016/j.jsams.2018.05.019  
40
- 41 107 Garcia TP, Marder K. Statistical Approaches to Longitudinal Data Analysis in  
42 Neurodegenerative Diseases: Huntington’s Disease as a Model. *Curr Neurol Neurosci Rep* 2017;**17**:14.  
43 doi:10.1007/s11910-017-0723-4  
44
- 45 108 Yang J, Zaitlen NA, Goddard ME, *et al.* Advantages and pitfalls in the application of mixed-  
46 model association methods. *Nat Genet* 2014;**46**:100–6. doi:10.1038/ng.2876  
47
- 48 109 Russell MA, Almeida DM, Maggs JL. Stressor-related drinking and future alcohol problems  
49 among university students. *Psychol Addict Behav* 2017;**31**:676–87. doi:10.1037/adb0000303  
50
- 51  
52  
53  
54  
55  
56  
57  
58  
59  
60



- 1  
2  
3 110 Bolger N, Laurenceau J-P. *Intensive Longitudinal Methods: An Introduction to Diary and*  
4 *Experience Sampling Research*. Guilford Press 2013.  
5  
6  
7 111 Gelman A, Hill J. *Data analysis using regression and multilevel/hierarchical models*. New York:  
8 : Cambridge University Press 2007. <http://www.loc.gov/catdir/enhancements/fy0668/2006040566-t.html>  
9 (accessed 12 Apr 2016).  
10  
11 112 Horton NJ, Switzer SS. Statistical Methods in the Journal. *N Engl J Med* 2005;**353**:1977–9.  
12 doi:10.1056/NEJM200511033531823  
13  
14 113 Nielsen RØ, Malisoux L, Møller M, *et al*. Shedding Light on the Etiology of Sports Injuries: A  
15 Look Behind the Scenes of Time-to-Event Analyses. *J Orthop Sports Phys Ther* 2016;**46**:300–11.  
16 doi:10.2519/jospt.2016.6510  
17  
18 114 Wu L, Liu W, Yi GY, *et al*. Analysis of Longitudinal and Survival Data: Joint Modeling,  
19 Inference Methods, and Issues. *J. Probab. Stat.* 2012. doi:10.1155/2012/640153  
20  
21 115 Andersen PK, Syriopoulou E, Parner ET. Causal inference in survival analysis using pseudo-  
22 observations. *Stat Med* 2017;**36**:2669–81. doi:10.1002/sim.7297  
23  
24 116 Hansen SN, Andersen PK, Parner ET. Events per variable for risk differences and relative risks  
25 using pseudo-observations. *Lifetime Data Anal N Y* 2014;**20**:584–98.  
26 doi:<http://dx.doi.org.ezproxy.library.ubc.ca/10.1007/s10985-013-9290-4>  
27  
28 117 Hickey GL, Philipson P, Jorgensen A, *et al*. Joint modelling of time-to-event and multivariate  
29 longitudinal outcomes: recent developments and issues. *BMC Med Res Methodol* 2016;**16**.  
30 doi:10.1186/s12874-016-0212-5  
31  
32 118 Mahmood A, Ullah S, Finch CF. Application of Survival Models in Sports Injury Prevention  
33 Research: A Systematic Review. *Br J Sports Med* 2014;**48**:630–630. doi:10.1136/bjsports-2014-  
34 093494.190  
35  
36 119 Carey DL, Crossley KM, Whiteley R, *et al*. Modelling Training Loads and Injuries: The Dangers  
37 of Discretization. *Med Sci Sports Exerc* Published Online First: June 2018.  
38 doi:10.1249/MSS.0000000000001685  
39  
40 120 Maldonado G, Greenland S. The importance of critically interpreting simulation studies.  
41 *Epidemiology* 1997;:453–456.  
42  
43 121 Trail JB, Collins LM, Rivera DE, *et al*. Functional data analysis for dynamical system  
44 identification of behavioral processes. *Psychol Methods* 2014;**19**:175–87. doi:10.1037/a0034035  
45  
46 122 de Haan-Rietdijk S, Kuppens P, Hamaker EL. What’s in a Day? A Guide to Decomposing the  
47 Variance in Intensive Longitudinal Data. *Front Psychol* 2016;**7**. doi:10.3389/fpsyg.2016.00891  
48  
49 123 Biddle SJH, Edwardson CL, Wilmot EG, *et al*. A Randomised Controlled Trial to Reduce  
50 Sedentary Time in Young Adults at Risk of Type 2 Diabetes Mellitus: Project STAND (Sedentary Time  
51 ANd Diabetes). *PLOS ONE* 2015;**10**:e0143398. doi:10.1371/journal.pone.0143398  
52  
53  
54  
55  
56  
57  
58  
59  
60

1  
2  
3 124 Casals M, Finch CF. Sports Biostatistician: a critical member of all sports science and medicine  
4 teams for injury prevention. *Inj Prev* 2016;:injuryprev-2016-042211. doi:10.1136/injuryprev-2016-  
5 042211  
6  
7  
8  
9  
10  
11  
12  
13  
14  
15  
16  
17  
18  
19  
20  
21  
22  
23  
24  
25  
26  
27  
28  
29  
30  
31  
32  
33  
34  
35  
36  
37  
38  
39  
40  
41  
42  
43  
44  
45  
46  
47  
48  
49  
50  
51  
52  
53  
54  
55  
56  
57  
58  
59  
60

For peer review only

1  
2  
3 **Figure 1** – The workload—injury aetiology model. Key features include the multifactorial nature of injury,  
4 between- and within- athlete differences in risk, and a recursive loop.  
5  
6  
7

8 **Figure 2** – Complex systems model of athletic injury. Web of determinants are shown for an ACL injury in  
9 basketball players (A), and in a ballet dancer (B)  
10  
11  
12  
13  
14  
15  
16  
17  
18  
19  
20  
21  
22  
23  
24  
25  
26  
27  
28  
29  
30  
31  
32  
33  
34  
35  
36  
37  
38  
39  
40  
41  
42  
43  
44  
45  
46  
47  
48  
49  
50  
51  
52  
53  
54  
55  
56  
57  
58  
59  
60



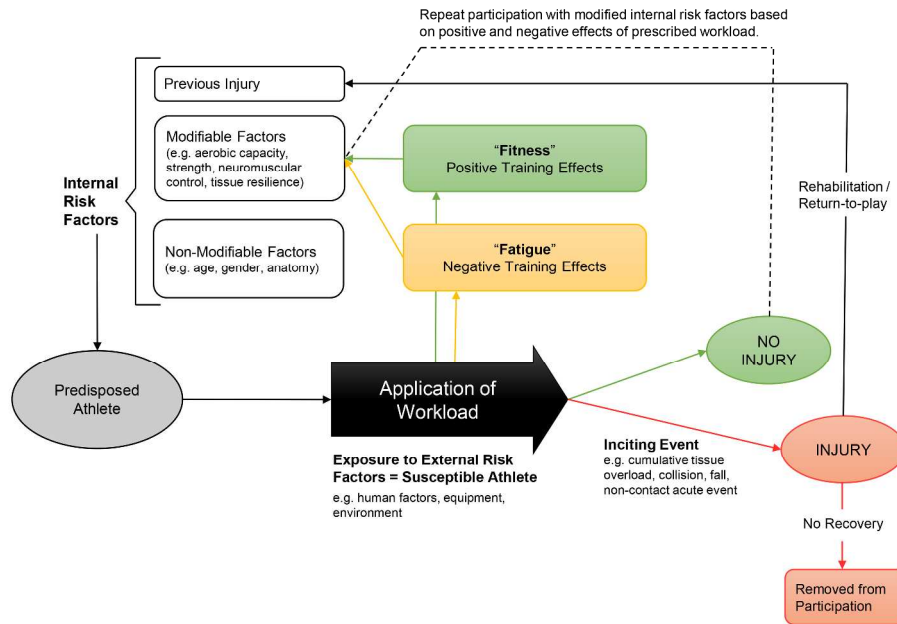

Figure 1 – The workload—injury aetiology model. Key features include the multifactorial nature of injury, between- and within- athlete differences in risk, and a recursive loop.

299x199mm (300 x 300 DPI)

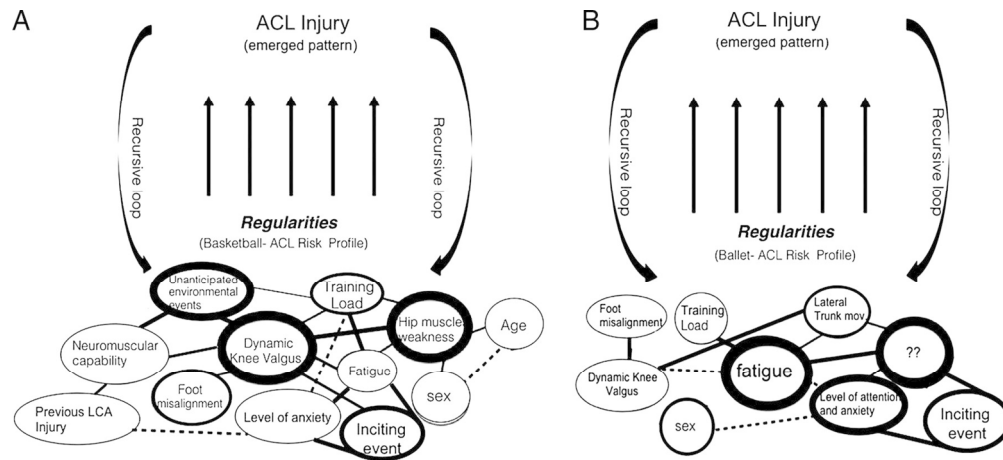

Figure 2 – Complex systems model of athletic injury. Web of determinants are shown for an ACL injury in basketball players (A), and in a ballet dancer (B)

152x69mm (300 x 300 DPI)

## APPENDIX 1 – Systematic Search Strategy and Article Selection

**Table A1 – Example search categories and terms:**

| Category         | Search Terms                                                                                                                                                                                                                                    |
|------------------|-------------------------------------------------------------------------------------------------------------------------------------------------------------------------------------------------------------------------------------------------|
| Population       | Athlet*, sport*                                                                                                                                                                                                                                 |
| Method           | Systematic review, Consensus statement                                                                                                                                                                                                          |
| Outcome (Injury) | Injur*, illness*, strain, sprain, incidence, overuse, overreach*, accidents, stress, wellness, recover*                                                                                                                                         |
| Workload         | Training, resistance training, external load, internal load, workload, acute:chronic workload ratio, congested calendar, physical exertion, session RPE, global position systems, accelerometry, intensity, duration, physical fitness, fatigue |

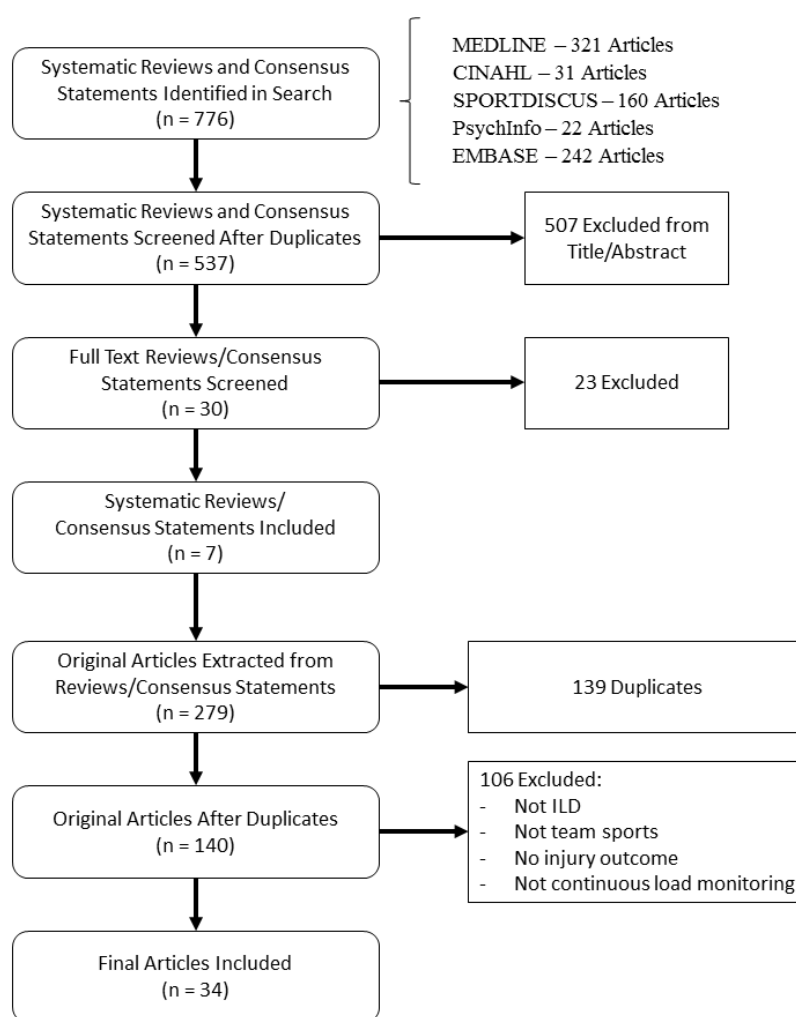

**Figure A1 – Flow chart of included articles**

**APPENDIX 2 – TABLE A2: Expanded Table of 3-Fold Alignment (With Descriptions)**

|                                                                                                                                                                                               |    | Themes of theoretical model                                   |                                                                                                                                                                                          |                                             | Themes of temporal design: intensive longitudinal data                                                                                             |                                                                                                                                     |                                                                                                        |                                                                                        | Statistical summary and typical uses                                                                                                                                                                                                              |
|-----------------------------------------------------------------------------------------------------------------------------------------------------------------------------------------------|----|---------------------------------------------------------------|------------------------------------------------------------------------------------------------------------------------------------------------------------------------------------------|---------------------------------------------|----------------------------------------------------------------------------------------------------------------------------------------------------|-------------------------------------------------------------------------------------------------------------------------------------|--------------------------------------------------------------------------------------------------------|----------------------------------------------------------------------------------------|---------------------------------------------------------------------------------------------------------------------------------------------------------------------------------------------------------------------------------------------------|
| Method                                                                                                                                                                                        | n  | Multifactorial aetiology                                      | Between and within-athlete differences                                                                                                                                                   | Complex system                              | Includes time-varying and time-invariant variables                                                                                                 | Missing/unbalanced data (due to rep. measures)                                                                                      | Repeated measure dependency                                                                            | Incorporates time in the analysis                                                      |                                                                                                                                                                                                                                                   |
| <b>Correlation (Pearson and Spearman)</b>                                                                                                                                                     | 10 | X                                                             | X                                                                                                                                                                                        | X                                           | X                                                                                                                                                  | X                                                                                                                                   | X                                                                                                      | X                                                                                      | 7 of the 10 articles correlated team loads with injury incidence (team-level). Of those at the individual level, 2 looked at # of pre-season sessions and % in-season completed, and 1 looked at training load and injury subscale on the REST-Q. |
| Anderson - 2003<br>Bresciani - 2010<br>Books - 2008<br>Gabbett - 2004<br>Gabbett Jenkins - 2011<br>Killen 2010<br>Mallo Dellal - 2012<br>Murray Gabbett - 2016<br>Owen - 2015<br>Windt – 2016 |    | Can only handle one x and one y variable.                     | Correlation could be at the team level (training load and # of injuries), or on individual level with quantitative outcome, but cannot differentiate within/between athlete differences. | No interactions between multiple predictors | No, assumes independent observations.                                                                                                              | Assumes one observation per research participant/study unit, so participants couldn't have different numbers of observations.       | In this case the correlation assumes independent observations so dependency is not taken into account. | Could, through having time as one of the variables, but cannot account for temporality |                                                                                                                                                                                                                                                   |
| <b>Unpaired t-test</b>                                                                                                                                                                        | 6  | X                                                             | X                                                                                                                                                                                        | X                                           | X                                                                                                                                                  | X                                                                                                                                   | X                                                                                                      | X                                                                                      | Generally, compared injured and uninjured players across a season. A group comparison of loading across the year fails to account for between/within athlete considerations and doesn't specify temporality.                                      |
| Dennis et al., 2003<br>Dennis et al., 2005<br>Duhig et al - 2016<br>Owen et al., 2015<br>Saw et al., 2011<br>Visnes Bahr., 2013                                                               |    | Can only handle one x (grouping) and one y (outcome) variable | Only between-athlete differences (injured vs. uninjured)                                                                                                                                 | No interactions between multiple predictors | Independent samples t-test compare group means on either a time-varying (e.g average workload) or time-invariant variable (e.g. height), not both. | No, assumes one observation per research participant/study unit, so by design forces a balanced set (1 observation per participant) | By definition, assumes independence                                                                    | None included time in the analysis.                                                    |                                                                                                                                                                                                                                                   |

|                                                                                                                          |   | Themes of theoretical model                                                                                                                                                                                        |                                                                            |                                             | Themes of temporal design: intensive longitudinal data |                                                            |                                                  |                                                                                   | Statistical summary and typical uses                                                                                                |
|--------------------------------------------------------------------------------------------------------------------------|---|--------------------------------------------------------------------------------------------------------------------------------------------------------------------------------------------------------------------|----------------------------------------------------------------------------|---------------------------------------------|--------------------------------------------------------|------------------------------------------------------------|--------------------------------------------------|-----------------------------------------------------------------------------------|-------------------------------------------------------------------------------------------------------------------------------------|
| Method                                                                                                                   | n | Multifactorial aetiology                                                                                                                                                                                           | Between and within-athlete differences                                     | Complex system                              | Includes time-varying and time-invariant variables     | Missing/unbalanced data (due to rep. measures)             | Repeated measure dependency                      | Incorporates time in the analysis                                                 |                                                                                                                                     |
| Chi-Square Tests                                                                                                         | 1 | X                                                                                                                                                                                                                  | X                                                                          | X                                           | X                                                      | X                                                          | X                                                | X                                                                                 |                                                                                                                                     |
| Murray - 2016 - IJSP                                                                                                     |   | Only examines load groups and injury incidence                                                                                                                                                                     | Examines differences in injury incidence across different load groups only | No interactions between multiple predictors | Included load groups and injury incidence only         | Forces 1 observation (aggregated variable) per participant | Designed for independent observations and groups | Only included load groups and injury incidence                                    |                                                                                                                                     |
| Relative Risk Calculations                                                                                               | 8 | O                                                                                                                                                                                                                  | X                                                                          | X                                           | X                                                      | X                                                          | X                                                | X                                                                                 |                                                                                                                                     |
| Bowen - 2016<br>Dennis - 2003<br>Dennis - 2005<br>Hulin - 2014<br>Hulin - 2016<br>Hulin - 2016<br>Murray - 2016 - Scand. |   | In some cases, authors examined relative risks of loading groups after subdividing across another variable, like chronic workload, making it multifactorial. Other authors only examined risks across load groups. | No differentiation, and independence assumed                               | No interactions between multiple predictors | Only loading (time-varying variables included)         | Assumes independence of observations                       | Assumes independence                             | Uses weeks as unit of analysis but no incorporation of time into the calculations | Many of these RR approaches seem to use RRs that traditionally require independence, but do not account for this in their analysis. |

|                                                                                                                                                                                                                                                                                                                                                                                                                                                                                              |    | Themes of theoretical model                                                               |                                                                               |                                               | Themes of temporal design: intensive longitudinal data                                                                                                                                |                                                          |                                                                                                                                           |                                                                | Statistical summary and typical uses |
|----------------------------------------------------------------------------------------------------------------------------------------------------------------------------------------------------------------------------------------------------------------------------------------------------------------------------------------------------------------------------------------------------------------------------------------------------------------------------------------------|----|-------------------------------------------------------------------------------------------|-------------------------------------------------------------------------------|-----------------------------------------------|---------------------------------------------------------------------------------------------------------------------------------------------------------------------------------------|----------------------------------------------------------|-------------------------------------------------------------------------------------------------------------------------------------------|----------------------------------------------------------------|--------------------------------------|
| Method                                                                                                                                                                                                                                                                                                                                                                                                                                                                                       | n  | Multifactorial aetiology                                                                  | Between and within-athlete differences                                        | Complex system                                | Includes time-varying and time-invariant variables                                                                                                                                    | Missing/unbalanced data (due to repeated measures)       | Repeated measure dependency                                                                                                               | Incorporates time in the analysis                              |                                      |
| <b>Regression (logistic, linear, multinomial)</b>                                                                                                                                                                                                                                                                                                                                                                                                                                            | 13 | O                                                                                         | X                                                                             | X                                             | X                                                                                                                                                                                     | X                                                        | X                                                                                                                                         | X                                                              |                                      |
| Arnason 2004 - Regular logistic<br>Bowen - 2016 - Regular logistic<br>Brink - 2010 - Regular multinomial<br>Colby - 2014 - Regular logistic<br>Duhig - 2016 - Regular logistic<br>Gabbett Domrow - 2007 - Regular linear<br>Hulin - 2014 - Regular logistic<br>Hulin - 2016 - Regular logistic<br>Hulin - 2016 - Regular logistic<br>Murray - 2016 - Regular logistic (Scand)<br>Owen - 2015 - Regular linear<br>Rogalski - 2013 - Regular logistic<br>Visnes Bahr - 2013 - Regular logistic |    | Some authors include multiple variables, others only single load measurements independent | Assume independent observations, so cannot examine within-athlete differences | None included interactions between predictors | Assumes 1 observation per unit<br><br>Becomes time invariant on aggregation<br><br>In this case, some authors have included both, but in doing so violate the independence assumption | No, assumes one observation per athlete or research unit | Assumes independence.<br><br>Visnes & Bahr (2013) do take it into account through logistic regression, but do not have the benefit of ILD | Assumes 1 observation per unit                                 |                                      |
| <b>Paired t-test</b>                                                                                                                                                                                                                                                                                                                                                                                                                                                                         | 2  | X                                                                                         | X                                                                             | X                                             | X                                                                                                                                                                                     | X                                                        | √                                                                                                                                         | √                                                              |                                      |
| Saw et al., 2011<br>Dennis et al., 2003                                                                                                                                                                                                                                                                                                                                                                                                                                                      |    | No, only one variable (before/after) and outcome (load)                                   | Only examines within-athlete differences                                      | No interactions between multiple predictors   | No - only time-varying variables                                                                                                                                                      | All subjects must have 2 'observations'                  | By definition, accounts for repeated measures through paired sample                                                                       | Time is incorporated as pre-injury and 'injury' blocks of time |                                      |

|                                                                                      |   | Themes of theoretical model                                                                                                                 |                                                                                                                            |                                             | Themes of temporal design: intensive longitudinal data  |                                                |                                                                         |                                                           | Statistical summary and typical uses                                                                                                                                                                                                                                                                                                                     |
|--------------------------------------------------------------------------------------|---|---------------------------------------------------------------------------------------------------------------------------------------------|----------------------------------------------------------------------------------------------------------------------------|---------------------------------------------|---------------------------------------------------------|------------------------------------------------|-------------------------------------------------------------------------|-----------------------------------------------------------|----------------------------------------------------------------------------------------------------------------------------------------------------------------------------------------------------------------------------------------------------------------------------------------------------------------------------------------------------------|
| Method                                                                               | n | Multifactorial aetiology                                                                                                                    | Between and within-athlete differences                                                                                     | Complex system                              | Includes time-varying and time-invariant variables      | Missing/unbalanced data (due to rep. measures) | Repeated measure dependency                                             | Incorporates time in the analysis                         |                                                                                                                                                                                                                                                                                                                                                          |
| Repeated measures ANOVA (One- or two-way ANOVA allowing for between- and within)     | 5 | ○                                                                                                                                           | ○                                                                                                                          | X                                           | ○                                                       | X                                              | √                                                                       | √                                                         | Killen used 1-way ANOVA to compare the load in early pre-season compared to late pre-season, and used chi-square analyses to compare injury rate in the early and late pre-season. Uses the two separate analyses to tentatively link load leads to injury. Gabbett, 2004 performed a 2-way ANOVA comparing loads (season X month), so time is included. |
| Ehrman - 2016<br>Gabbett - 2004<br>Malisoux - 2013<br>Murray - 2016<br>Killen - 2011 |   | Murray (2016) compared part of season by training load group, Malisoux (2013) and Ehrmann (2016) only compared injury and pre-injury blocks | In some cases (Murray, 2016), a two-way repeated measures ANOVA can examine between and within athlete differences in risk | No interactions between multiple predictors | Murray (2013) compared load group by season period      | Assume sphericity                              | Yes, by definition                                                      | Yes, as season period, or as pre-injury and injury period |                                                                                                                                                                                                                                                                                                                                                          |
| Cox proportional hazards model                                                       | 1 | √                                                                                                                                           | X                                                                                                                          | X                                           | X                                                       | √                                              | √                                                                       | √                                                         |                                                                                                                                                                                                                                                                                                                                                          |
| Malisoux - 2013                                                                      |   | Included volume and intensity of training along with age and sex                                                                            | Cox PH conducted at the team/school level examined between-athlete differences                                             | No interactions between factors             | Only included average weekly load and average intensity | Can handle unbalanced data                     | By using time-to-event as the outcome, Cox-PH robust to this dependency | Uses time to event in analysis                            |                                                                                                                                                                                                                                                                                                                                                          |

|                                                                                                                 |   | Themes of theoretical model                                                                                                                       |                                                                                      |                                         | Themes of temporal design: intensive longitudinal data               |                                                         |                                                               |                                                                                                                    | Statistical summary and typical uses                                                                                                                                       |
|-----------------------------------------------------------------------------------------------------------------|---|---------------------------------------------------------------------------------------------------------------------------------------------------|--------------------------------------------------------------------------------------|-----------------------------------------|----------------------------------------------------------------------|---------------------------------------------------------|---------------------------------------------------------------|--------------------------------------------------------------------------------------------------------------------|----------------------------------------------------------------------------------------------------------------------------------------------------------------------------|
| Method                                                                                                          | n | Multifactorial aetiology                                                                                                                          | Between and within-athlete differences                                               | Complex system                          | Includes time-varying and time-invariant variables                   | Missing/unbalanced data (due to rep. measures)          | Repeated measure dependency                                   | Incorporates time in the analysis                                                                                  |                                                                                                                                                                            |
| <b>Generalised estimating equations (modeled through logistic and poisson regression)</b>                       | 6 | O                                                                                                                                                 | X                                                                                    | X                                       | O                                                                    | √                                                       | √                                                             | O                                                                                                                  | Most GEE approaches accounted for repeated measures, but Clausen et al (2014) used them to cluster players within teams), averaging exposure throughout the entire season. |
| Clausen - 2014<br>Cross - 2016<br>Dennis - 2004<br>Gabbett - 2010<br>Gabbett Domrow - 2007<br>Veugeleers - 2016 |   | Most authors used multiple variables with GEEs, although some only used GEE to account for repeated measures (Dennis, 2004, Gabbett Domrow, 2007) | Provides an 'average' effect for all athletes, but controls for the clustering       | No complex interactions between factors | Some authors only predicted injury (y/n) based on workload variables | GEEs handle unbalanced data well                        | GEE accounts for clustering                                   | Do not incorporate time explicitly into the modelling process, and none of the authors included time in the model. |                                                                                                                                                                            |
| <b>Multilevel Modeling</b>                                                                                      | 1 | √                                                                                                                                                 | √                                                                                    | X                                       | √                                                                    | √                                                       | √                                                             | X                                                                                                                  |                                                                                                                                                                            |
| Windt et al - 2016                                                                                              |   | Multiple physical outputs included and pre-season training                                                                                        | Within-athlete risks determined from level 1 variables, between-athlete from level 2 | No complex interactions between factors | Pre-season and player variables along with training variables        | Multilevel models are robust to missing/unbalanced data | Via random effects for each player                            | Analysed weekly risk and subsequent week risk; did not directly incorporate time                                   |                                                                                                                                                                            |
| <b>Frailty model</b>                                                                                            | 1 | √                                                                                                                                                 | √                                                                                    | X                                       | √                                                                    | √                                                       | √                                                             | √                                                                                                                  | Included a many physical output metrics that were dichotomised into high/low categories and calculated RRs. Multicollinearity was not considered                           |
| Gabbett Ullah - 2012                                                                                            |   | Yes, previous injury and physical outputs                                                                                                         | Unclear (I think yes due to the frailty term)                                        | No complex interactions between factors | Yes (injury history)                                                 | Yes (robust to unbalanced data)                         | Yes (frailty model allows for dependency of recurrent events) | Yes, since this is a time-to-event analysis.                                                                       |                                                                                                                                                                            |
