# Supplementary material for: Getting the most out of intensive longitudinal data: a methodological review of workload–injury studies
Source: PubMed Central journal article supplement — BMJ Open. 2018 Oct 2;8(10):e022626. doi: 10.1136/bmjopen-2018-022626 (PMC6169745; doi:10.1136/bmjopen-2018-022626), 2018-10-02
Supplement: bmjopen-2018-022626supp001.pdf [file bmjopen-2018-022626supp001.pdf]

## APPENDIX 1 – Systematic Search Strategy and Article Selection

**Table A1 – Example search categories and terms:**

| Category         | Search Terms                                                                                                                                                                                                                                    |
|------------------|-------------------------------------------------------------------------------------------------------------------------------------------------------------------------------------------------------------------------------------------------|
| Population       | Athlet*, sport*                                                                                                                                                                                                                                 |
| Method           | Systematic review, Consensus statement                                                                                                                                                                                                          |
| Outcome (Injury) | Injur*, illness*, strain, sprain, incidence, overuse, overreach*, accidents, stress, wellness, recover*                                                                                                                                         |
| Workload         | Training, resistance training, external load, internal load, workload, acute:chronic workload ratio, congested calendar, physical exertion, session RPE, global position systems, accelerometry, intensity, duration, physical fitness, fatigue |

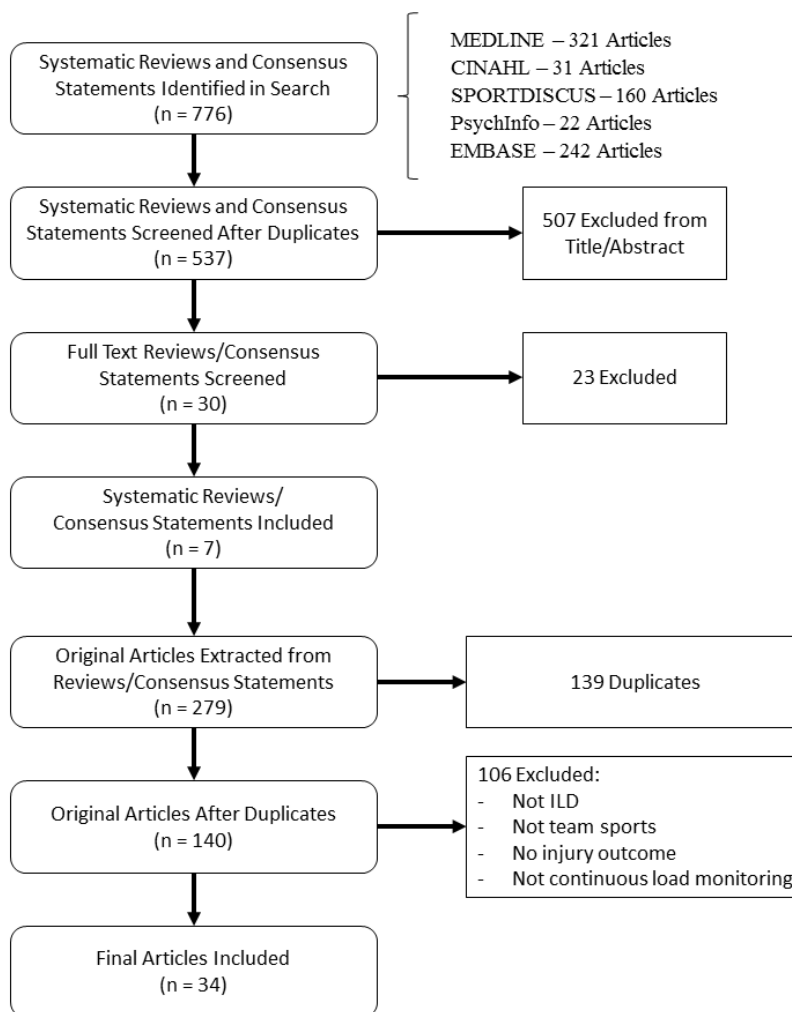

**Figure A1 – Flow chart of included articles**

**APPENDIX 2 – TABLE A2: Expanded Table of 3-Fold Alignment (With Descriptions)**

|                                                                                                                                                                                               |    | Themes of theoretical model                                   |                                                                                                                                                                                          |                                             | Themes of temporal design: intensive longitudinal data                                                                                             |                                                                                                                                     |                                                                                                        |                                                                                        | Statistical summary and typical uses                                                                                                                                                                                                              |
|-----------------------------------------------------------------------------------------------------------------------------------------------------------------------------------------------|----|---------------------------------------------------------------|------------------------------------------------------------------------------------------------------------------------------------------------------------------------------------------|---------------------------------------------|----------------------------------------------------------------------------------------------------------------------------------------------------|-------------------------------------------------------------------------------------------------------------------------------------|--------------------------------------------------------------------------------------------------------|----------------------------------------------------------------------------------------|---------------------------------------------------------------------------------------------------------------------------------------------------------------------------------------------------------------------------------------------------|
| Method                                                                                                                                                                                        | n  | Multifactorial aetiology                                      | Between and within-athlete differences                                                                                                                                                   | Complex system                              | Includes time-varying and time-invariant variables                                                                                                 | Missing/unbalanced data (due to rep. measures)                                                                                      | Repeated measure dependency                                                                            | Incorporates time in the analysis                                                      |                                                                                                                                                                                                                                                   |
| Correlation (Pearson and Spearman)                                                                                                                                                            | 10 | X                                                             | X                                                                                                                                                                                        | X                                           | X                                                                                                                                                  | X                                                                                                                                   | X                                                                                                      | X                                                                                      | 7 of the 10 articles correlated team loads with injury incidence (team-level). Of those at the individual level, 2 looked at # of pre-season sessions and % in-season completed, and 1 looked at training load and injury subscale on the REST-Q. |
| Anderson - 2003<br>Bresciani - 2010<br>Books - 2008<br>Gabbett - 2004<br>Gabbett Jenkins - 2011<br>Killen 2010<br>Mallo Dellal - 2012<br>Murray Gabbett - 2016<br>Owen - 2015<br>Windt – 2016 |    | Can only handle one x and one y variable.                     | Correlation could be at the team level (training load and # of injuries), or on individual level with quantitative outcome, but cannot differentiate within/between athlete differences. | No interactions between multiple predictors | No, assumes independent observations.                                                                                                              | Assumes one observation per research participant/study unit, so participants couldn't have different numbers of observations.       | In this case the correlation assumes independent observations so dependency is not taken into account. | Could, through having time as one of the variables, but cannot account for temporality |                                                                                                                                                                                                                                                   |
| Unpaired t-test                                                                                                                                                                               | 6  | X                                                             | X                                                                                                                                                                                        | X                                           | X                                                                                                                                                  | X                                                                                                                                   | X                                                                                                      | X                                                                                      |                                                                                                                                                                                                                                                   |
| Dennis et al., 2003<br>Dennis et al., 2005<br>Duhig et al - 2016<br>Owen et al., 2015<br>Saw et al., 2011<br>Visnes Bahr., 2013                                                               |    | Can only handle one x (grouping) and one y (outcome) variable | Only between-athlete differences (injured vs. uninjured)                                                                                                                                 | No interactions between multiple predictors | Independent samples t-test compare group means on either a time-varying (e.g average workload) or time-invariant variable (e.g. height), not both. | No, assumes one observation per research participant/study unit, so by design forces a balanced set (1 observation per participant) | By definition, assumes independence                                                                    | None included time in the analysis.                                                    | Generally, compared injured and uninjured players across a season. A group comparison of loading across the year fails to account for between/within athlete considerations and doesn't specify temporality.                                      |

|                                                                                                                          |   | Themes of theoretical model                                                                                                                                                                                        |                                                                            |                                             | Themes of temporal design: intensive longitudinal data |                                                            |                                                  |                                                                                   | Statistical summary and typical uses                                                                                                |
|--------------------------------------------------------------------------------------------------------------------------|---|--------------------------------------------------------------------------------------------------------------------------------------------------------------------------------------------------------------------|----------------------------------------------------------------------------|---------------------------------------------|--------------------------------------------------------|------------------------------------------------------------|--------------------------------------------------|-----------------------------------------------------------------------------------|-------------------------------------------------------------------------------------------------------------------------------------|
| Method                                                                                                                   | n | Multifactorial aetiology                                                                                                                                                                                           | Between and within-athlete differences                                     | Complex system                              | Includes time-varying and time-invariant variables     | Missing/unbalanced data (due to rep. measures)             | Repeated measure dependency                      | Incorporates time in the analysis                                                 |                                                                                                                                     |
| Chi-Square Tests                                                                                                         | 1 | X                                                                                                                                                                                                                  | X                                                                          | X                                           | X                                                      | X                                                          | X                                                | X                                                                                 |                                                                                                                                     |
| Murray - 2016 - IJSP                                                                                                     |   | Only examines load groups and injury incidence                                                                                                                                                                     | Examines differences in injury incidence across different load groups only | No interactions between multiple predictors | Included load groups and injury incidence only         | Forces 1 observation (aggregated variable) per participant | Designed for independent observations and groups | Only included load groups and injury incidence                                    |                                                                                                                                     |
| Relative Risk Calculations                                                                                               | 8 | O                                                                                                                                                                                                                  | X                                                                          | X                                           | X                                                      | X                                                          | X                                                | X                                                                                 |                                                                                                                                     |
| Bowen - 2016<br>Dennis - 2003<br>Dennis - 2005<br>Hulin - 2014<br>Hulin - 2016<br>Hulin - 2016<br>Murray - 2016 - Scand. |   | In some cases, authors examined relative risks of loading groups after subdividing across another variable, like chronic workload, making it multifactorial. Other authors only examined risks across load groups. | No differentiation, and independence assumed                               | No interactions between multiple predictors | Only loading (time-varying variables included)         | Assumes independence of observations                       | Assumes independence                             | Uses weeks as unit of analysis but no incorporation of time into the calculations | Many of these RR approaches seem to use RRs that traditionally require independence, but do not account for this in their analysis. |

|                                                                                                                                                                                                                                                                                                                                                                                                                                                                                              |    | Themes of theoretical model                                                                 |                                                                               |                                               | Themes of temporal design: intensive longitudinal data                                                                                                                                |                                                          |                                                                                                                                           |                                                                | Statistical summary and typical uses |
|----------------------------------------------------------------------------------------------------------------------------------------------------------------------------------------------------------------------------------------------------------------------------------------------------------------------------------------------------------------------------------------------------------------------------------------------------------------------------------------------|----|---------------------------------------------------------------------------------------------|-------------------------------------------------------------------------------|-----------------------------------------------|---------------------------------------------------------------------------------------------------------------------------------------------------------------------------------------|----------------------------------------------------------|-------------------------------------------------------------------------------------------------------------------------------------------|----------------------------------------------------------------|--------------------------------------|
| Method                                                                                                                                                                                                                                                                                                                                                                                                                                                                                       | n  | Multifactorial aetiology                                                                    | Between and within-athlete differences                                        | Complex system                                | Includes time-varying and time-invariant variables                                                                                                                                    | Missing/unbalanced data (due to repeated measures)       | Repeated measure dependency                                                                                                               | Incorporates time in the analysis                              |                                      |
| <b>Regression (logistic, linear, multinomial)</b>                                                                                                                                                                                                                                                                                                                                                                                                                                            | 13 | O                                                                                           | X                                                                             | X                                             | X                                                                                                                                                                                     | X                                                        | X                                                                                                                                         | X                                                              |                                      |
| Arnason 2004 - Regular logistic<br>Bowen - 2016 - Regular logistic<br>Brink - 2010 - Regular multinomial<br>Colby - 2014 - Regular logistic<br>Duhig - 2016 - Regular logistic<br>Gabbett Domrow - 2007 - Regular linear<br>Hulin - 2014 - Regular logistic<br>Hulin - 2016 - Regular logistic<br>Hulin - 2016 - Regular logistic<br>Murray - 2016 - Regular logistic (Scand)<br>Owen - 2015 - Regular linear<br>Rogalski - 2013 - Regular logistic<br>Visnes Bahr - 2013 - Regular logistic |    | Some authors include multiple variables, others only single load measurements independently | Assume independent observations, so cannot examine within-athlete differences | None included interactions between predictors | Assumes 1 observation per unit<br><br>Becomes time invariant on aggregation<br><br>In this case, some authors have included both, but in doing so violate the independence assumption | No, assumes one observation per athlete or research unit | Assumes independence.<br><br>Visnes & Bahr (2013) do take it into account through logistic regression, but do not have the benefit of ILD | Assumes 1 observation per unit                                 |                                      |
| <b>Paired t-test</b>                                                                                                                                                                                                                                                                                                                                                                                                                                                                         | 2  | X                                                                                           | X                                                                             | X                                             | X                                                                                                                                                                                     | X                                                        | √                                                                                                                                         | √                                                              |                                      |
| Saw et al., 2011<br>Dennis et al., 2003                                                                                                                                                                                                                                                                                                                                                                                                                                                      |    | No, only one variable (before/after) and outcome (load)                                     | Only examines within-athlete differences                                      | No interactions between multiple predictors   | No - only time-varying variables                                                                                                                                                      | All subjects must have 2 'observations'                  | By definition, accounts for repeated measures through paired sample                                                                       | Time is incorporated as pre-injury and 'injury' blocks of time |                                      |

|                                                                                      |   | Themes of theoretical model                                                                                                                 |                                                                                                                            |                                             | Themes of temporal design: intensive longitudinal data  |                                                |                                                                         |                                                           | Statistical summary and typical uses                                                                                                                                                                                                                                                                                                                     |
|--------------------------------------------------------------------------------------|---|---------------------------------------------------------------------------------------------------------------------------------------------|----------------------------------------------------------------------------------------------------------------------------|---------------------------------------------|---------------------------------------------------------|------------------------------------------------|-------------------------------------------------------------------------|-----------------------------------------------------------|----------------------------------------------------------------------------------------------------------------------------------------------------------------------------------------------------------------------------------------------------------------------------------------------------------------------------------------------------------|
| Method                                                                               | n | Multifactorial aetiology                                                                                                                    | Between and within-athlete differences                                                                                     | Complex system                              | Includes time-varying and time-invariant variables      | Missing/unbalanced data (due to rep. measures) | Repeated measure dependency                                             | Incorporates time in the analysis                         |                                                                                                                                                                                                                                                                                                                                                          |
| Repeated measures ANOVA (One- or two-way ANOVA allowing for between- and within)     | 5 | O                                                                                                                                           | O                                                                                                                          | X                                           | O                                                       | X                                              | √                                                                       | √                                                         | Killen used 1-way ANOVA to compare the load in early pre-season compared to late pre-season, and used chi-square analyses to compare injury rate in the early and late pre-season. Uses the two separate analyses to tentatively link load leads to injury. Gabbett, 2004 performed a 2-way ANOVA comparing loads (season X month), so time is included. |
| Ehrman - 2016<br>Gabbett - 2004<br>Malisoux - 2013<br>Murray - 2016<br>Killen - 2011 |   | Murray (2016) compared part of season by training load group, Malisoux (2013) and Ehrmann (2016) only compared injury and pre-injury blocks | In some cases (Murray, 2016), a two-way repeated measures ANOVA can examine between and within athlete differences in risk | No interactions between multiple predictors | Murray (2013) compared load group by season period      | Assume sphericity                              | Yes, by definition                                                      | Yes, as season period, or as pre-injury and injury period |                                                                                                                                                                                                                                                                                                                                                          |
| Cox proportional hazards model                                                       | 1 | √                                                                                                                                           | X                                                                                                                          | X                                           | X                                                       | √                                              | √                                                                       | √                                                         |                                                                                                                                                                                                                                                                                                                                                          |
| Malisoux - 2013                                                                      |   | Included volume and intensity of training along with age and sex                                                                            | Cox PH conducted at the team/school level examined between-athlete differences                                             | No interactions between factors             | Only included average weekly load and average intensity | Can handle unbalanced data                     | By using time-to-event as the outcome, Cox-PH robust to this dependency | Uses time to event in analysis                            |                                                                                                                                                                                                                                                                                                                                                          |

|                                                                                                                 |   | Themes of theoretical model                                                                                                                       |                                                                                      |                                         | Themes of temporal design: intensive longitudinal data               |                                                         |                                                               |                                                                                                                    | Statistical summary and typical uses                                                                                                                                       |
|-----------------------------------------------------------------------------------------------------------------|---|---------------------------------------------------------------------------------------------------------------------------------------------------|--------------------------------------------------------------------------------------|-----------------------------------------|----------------------------------------------------------------------|---------------------------------------------------------|---------------------------------------------------------------|--------------------------------------------------------------------------------------------------------------------|----------------------------------------------------------------------------------------------------------------------------------------------------------------------------|
| Method                                                                                                          | n | Multifactorial aetiology                                                                                                                          | Between and within-athlete differences                                               | Complex system                          | Includes time-varying and time-invariant variables                   | Missing/unbalanced data (due to rep. measures)          | Repeated measure dependency                                   | Incorporates time in the analysis                                                                                  |                                                                                                                                                                            |
| <b>Generalised estimating equations (modeled through logistic and poisson regression)</b>                       | 6 | O                                                                                                                                                 | X                                                                                    | X                                       | O                                                                    | √                                                       | √                                                             | O                                                                                                                  | Most GEE approaches accounted for repeated measures, but Clausen et al (2014) used them to cluster players within teams), averaging exposure throughout the entire season. |
| Clausen - 2014<br>Cross - 2016<br>Dennis - 2004<br>Gabbett - 2010<br>Gabbett Domrow - 2007<br>Veugeleers - 2016 |   | Most authors used multiple variables with GEEs, although some only used GEE to account for repeated measures (Dennis, 2004, Gabbett Domrow, 2007) | Provides an 'average' effect for all athletes, but controls for the clustering       | No complex interactions between factors | Some authors only predicted injury (y/n) based on workload variables | GEEs handle unbalanced data well                        | GEE accounts for clustering                                   | Do not incorporate time explicitly into the modelling process, and none of the authors included time in the model. |                                                                                                                                                                            |
| <b>Multilevel Modeling</b>                                                                                      | 1 | √                                                                                                                                                 | √                                                                                    | X                                       | √                                                                    | √                                                       | √                                                             | X                                                                                                                  |                                                                                                                                                                            |
| Windt et al - 2016                                                                                              |   | Multiple physical outputs included and pre-season training                                                                                        | Within-athlete risks determined from level 1 variables, between-athlete from level 2 | No complex interactions between factors | Pre-season and player variables along with training variables        | Multilevel models are robust to missing/unbalanced data | Via random effects for each player                            | Analysed weekly risk and subsequent week risk; did not directly incorporate time                                   |                                                                                                                                                                            |
| <b>Frailty model</b>                                                                                            | 1 | √                                                                                                                                                 | √                                                                                    | X                                       | √                                                                    | √                                                       | √                                                             | √                                                                                                                  | Included a many physical output metrics that were dichotomised into high/low categories and calculated RRs. Multicollinearity was not considered                           |
| Gabbett Ullah - 2012                                                                                            |   | Yes, previous injury and physical outputs                                                                                                         | Unclear (I think yes due to the frailty term)                                        | No complex interactions between factors | Yes (injury history)                                                 | Yes (robust to unbalanced data)                         | Yes (frailty model allows for dependency of recurrent events) | Yes, since this is a time-to-event analysis.                                                                       |                                                                                                                                                                            |
